# Supplementary material
Source: publisher site journal article supplement (https://www.dovepress.com/article/supplementary_file/515649/Supplementary%20File_1.xlsx)
Supplement: Supplementary file 1 [file Supplementary%20File_1.xlsx]

## Sheet: Supplementary File 1
Experimental Raw Data
Year.x	seqn	sdmvpsu.x	sdmvstra.x	PIR	insurance	cancer	Year.y	sdmvpsu.y	sdmvstra.y	age	sex	eth	marry	edu	Pregnant	COPD	LC9	LC9_count	score_hei	score_pa	score_smoke	score_sleep	score_bmi	score_non.hdl	score_glucose	score_bp	score_PHQ9	wtdrd1
2007-2008	41475	1	60	1.83	No	No	2007-2008	1	60	62	Female	Other Race - Including Multi-Racial	Married	High School Grad/GED or Equivalent		no	44.4444	9	0	0	100	70	0	40	60	55	75	53942.2
2007-2008	41476	1	70	5	Yes		2007-2008	1	70	6	Female	Other Race - Including Multi-Racial		Never Attended / Kindergarten Only														20558.4
2007-2008	41477	1	67	1.5	Yes	No	2007-2008	1	67	71	Male	Non-Hispanic White	Married	High School Grad/GED or Equivalent		no	42.2222	9	0	0	75	100	30	60	10	5	100	9050.13
2007-2008	41478	2	59	0.66	Yes		2007-2008	2	59	1	Female	Non-Hispanic White																32343.2
2007-2008	41479	1	70	2.2	No	No	2007-2008	1	70	52	Male	Mexican American	Married	Less Than 9th Grade		no	76.1111	9	25	100	100	70	70	60	60	100	100	5078.44
2007-2008	41480	2	69	0.85	Yes		2007-2008	2	69	6	Male	Mexican American		Never Attended / Kindergarten Only														3723.88
2007-2008	41481	2	68	1.63	No	No	2007-2008	2	68	21	Male	Non-Hispanic Black	Never married	High School Grad/GED or Equivalent		no	66.1111	7	25	100	100	70	100			100	100	12871
2007-2008	41482	2	65	4.01	Yes	No	2007-2008	2	65	64	Male	Mexican American	Married	9-11th Grade (Includes 12th grade with no diploma)		no												7517.69
2007-2008	41483	2	66	1.14	Yes	No	2007-2008	2	66	66	Male	Non-Hispanic Black	Married	Some College or AA degree		no	51.6667	9	25	0	100	40	0	80	40	80	100	7180.61
2007-2008	41484	2	59	0.52	Yes		2007-2008	2	59	0	Male	Non-Hispanic White																6641.98
2007-2008	41485	2	71	1.01	No	No	2007-2008	2	71	30	Female	Other Hispanic	Married	9-11th Grade (Includes 12th grade with no diploma)	no	no	74.4444	9	0	100	100	40	70	60	100	100	100	38644.9
2007-2008	41486	1	73	1.75	No	Yes	2007-2008	1	73	61	Female	Mexican American	Married	Less Than 9th Grade		no	60.5556	9	100	0	100	40	30	60	60	55	100	3522.44
2007-2008	41487	1	59	5	Yes	No	2007-2008	1	59	27	Male	Other Race - Including Multi-Racial	Never married	College Graduate or above		no	81.6667	9	25	100	100	100	100	60	100	50	100	52595.1
2007-2008	41488	1	68	1.4	No		2007-2008	1	68	5	Male	Mexican American																18956.9
2007-2008	41489	1	66	2.15	Yes	No	2007-2008	1	66	40	Female	Mexican American	Married	High School Grad/GED or Equivalent	no	no	67.7778	9	25	0	100	70	15	100	100	100	100	14249.8
2007-2008	41490	1	63	4.09	Yes	No	2007-2008	1	63	66	Female	Non-Hispanic Black	Married	Some College or AA degree		no	62.7778	9	50	0	75	100	70	60	60	50	100	9558.7
2007-2008	41491	2	59	0.83	Yes		2007-2008	2	59	11	Female	Non-Hispanic White		4th Grade		no												13327
2007-2008	41492	1	62	1.02	Yes	No	2007-2008	1	62	72	Male	Non-Hispanic White	Married	Less Than 9th Grade		no	91.1111	9	100	100	100	100	70	100	100	50	100	8361.12
2007-2008	41493	2	60	1.57	Yes	Yes	2007-2008	2	60	77	Female	Non-Hispanic White	Widowed	9-11th Grade (Includes 12th grade with no diploma)		yes	57.2222	9	0	60	0	100	100	40	60	80	75	78473.7
2007-2008	41494	1	65	1.3	No	No	2007-2008	1	65	40	Male	Mexican American	Married	High School Grad/GED or Equivalent		no												8305.46
2007-2008	41495	2	66	5	Yes	No	2007-2008	2	66	61	Male	Non-Hispanic White	Married	College Graduate or above		no	73.8889	9	50	90	50	100	70	80	100	100	25	96206.2
2007-2008	41496	1	71	0.59	Yes	No	2007-2008	1	71	64	Female	Mexican American	Separated	Less Than 9th Grade		no	57.2222	9	50	0	100	90	70	40	40	50	75	8077.13
2007-2008	41497	1	62	4.66	Yes		2007-2008	1	62	2	Female	Other Race - Including Multi-Racial																19581
2007-2008	41498	1	72	1.63	Yes	No	2007-2008	1	72	68	Male	Non-Hispanic Black	Living with partner	Less Than 9th Grade		no												7551.42
2007-2008	41499	2	72	1.65	Yes		2007-2008	2	72	17	Female	Mexican American		11th Grade														8855.09
2007-2008	41500	2	71	1.36	No		2007-2008	2	71	14	Female	Mexican American		8th Grade														7922.95
2007-2008	41501	1	59	4.6	Yes	Yes	2007-2008	1	59	70	Male	Non-Hispanic White	Never married	Less Than 9th Grade		no	57.7778	9	25	80	75	100	15	80	40	5	100	27913
2007-2008	41502	2	71	3.41	No	No	2007-2008	2	71	29	Male	Mexican American	Married	High School Grad/GED or Equivalent		no	77.2222	9	50	100	0	100	70	100	100	100	75	15175.4
2007-2008	41503	1	64		No		2007-2008	1	64	18	Male	Non-Hispanic White		High School Graduate														42482.7
2007-2008	41504	1	68	3.29	Yes	No	2007-2008	1	68	63	Male	Non-Hispanic White	Married	College Graduate or above		no	73.3333	9	0	100	75	100	100	80	100	5	100	51977.2
2007-2008	41505	2	73	1.74	No		2007-2008	2	73	1	Male	Mexican American																4325.37
2007-2008	41506	1	60	4.38	Yes	Yes	2007-2008	1	60	77	Male	Non-Hispanic White	Married	Some College or AA degree		no												28178.8
2007-2008	41507	2	67	5	Yes		2007-2008	2	67	6	Female	Non-Hispanic Black		Never Attended / Kindergarten Only														19291.1
2007-2008	41508	2	68	0.73	Yes		2007-2008	2	68	1	Male	Other Hispanic																6032.49
2007-2008	41509	2	67	1.14	Yes	No	2007-2008	2	67	48	Male	Other Hispanic	Married	Some College or AA degree		no	49.4444	8	80	100	0	70	30	40		50	75	47906.7
2007-2008	41510	2	59		No	No	2007-2008	2	59	33	Female	Non-Hispanic White	Living with partner	Some College or AA degree	no	no	72.7778	9	0	100	30	100	100	100	100	50	75	18386.5
2007-2008	41511	1	65	5	No	No	2007-2008	1	65	35	Male	Mexican American	Married	College Graduate or above		no												12804.3
2007-2008	41512	1	64	1.24	Yes	No	2007-2008	1	64	80	Female	Non-Hispanic White	Widowed	Some College or AA degree		yes												24324.2
2007-2008	41513	2	71	1.34	Yes	No	2007-2008	2	71	80	Female	Other Hispanic	Never married	Less Than 9th Grade		no
2007-2008	41514	2	63	4.33	Yes	No	2007-2008	2	63	70	Male	Non-Hispanic White	Never married	College Graduate or above		no												29400.3
2007-2008	41515	1	66	1.16	Yes		2007-2008	1	66	5	Female	Mexican American																26562.3
2007-2008	41516	1	61	1.68	Yes	Yes	2007-2008	1	61	74	Female	Non-Hispanic White	Married	Less Than 9th Grade		no	40.5556	9	0	0	75	70	15	40	40	75	50	30639.3
2007-2008	41517	2	66	4.55	Yes		2007-2008	2	66	0	Male	Non-Hispanic Black																6017.58
2007-2008	41518	2	60	5	Yes	No	2007-2008	2	60	50	Male	Non-Hispanic White	Married	College Graduate or above		no	81.1111	9	0	100	100	100	70	60	100	100	100	53202.4
2007-2008	41519	1	68	2.04	Yes	Yes	2007-2008	1	68	70	Male	Non-Hispanic Black	Married	High School Grad/GED or Equivalent		no
2007-2008	41520	2	70	2.04	Yes		2007-2008	2	70	4	Female	Non-Hispanic Black																7179.98
2007-2008	41521	1	68	5	Yes		2007-2008	1	68	1	Female	Non-Hispanic Black																8214.49
2007-2008	41522	2	72	1.21	Yes	No	2007-2008	2	72	72	Male	Non-Hispanic White	Married	Some College or AA degree		no	61.6667	9	0	80	100	100	70	40	60	5	100	16860.1
2007-2008	41523	2	65	4.48	Yes	No	2007-2008	2	65	28	Male	Non-Hispanic Black	Married	High School Grad/GED or Equivalent		no	56.6667	9	25	100	100	20	30	0	60	75	100	20697.3
2007-2008	41524	1	69	2.19	Yes	No	2007-2008	1	69	80	Female	Non-Hispanic White	Married	College Graduate or above		no	59.4444	8	80	80	75	70		60	40	30	100	32365
2007-2008	41525	2	68	2.84	Yes	No	2007-2008	2	68	51	Male	Non-Hispanic Black	Married	High School Grad/GED or Equivalent		yes	75	9	50	100	75	70	70	60	100	50	100	15031.2
2007-2008	41526	2	67	2.4	Yes	Yes	2007-2008	2	67	64	Female	Non-Hispanic White	Divorced	High School Grad/GED or Equivalent		no	69.4444	9	50	80	75	100	70	40	60	50	100	102166
2007-2008	41527	1	60	0.82	No	No	2007-2008	1	60	44	Male	Non-Hispanic White	Married	High School Grad/GED or Equivalent		no	69.4444	9	50	100	100	100	70	0	100	30	75	36451.9
2007-2008	41528	1	62		No	No	2007-2008	1	62	63	Male	Other Race - Including Multi-Racial	Divorced	9-11th Grade (Includes 12th grade with no diploma)		yes	28.3333	7	50	0	75	20	30			55	25	63753.2
2007-2008	41529	1	66	2.66	Yes	No	2007-2008	1	66	24	Male	Mexican American	Married	College Graduate or above		no
2007-2008	41530	1	70	2.25	No		2007-2008	1	70	16	Female	Mexican American		10th Grade
2007-2008	41531	2	61	1.81	Yes	No	2007-2008	2	61	43	Male	Other Hispanic	Married	9-11th Grade (Includes 12th grade with no diploma)		no	76.6667	9	50	100	100	70	70	40	60	100	100	41805.5
2007-2008	41532	2	68	0.89	Yes		2007-2008	2	68	8	Male	Non-Hispanic Black		Never Attended / Kindergarten Only														10378.3
2007-2008	41533	2	65	2.82	Yes		2007-2008	2	65	7	Female	Other Hispanic		Never Attended / Kindergarten Only														7496.46
2007-2008	41534	2	69	1.54	Yes	No	2007-2008	2	69	37	Female	Other Race - Including Multi-Racial	Never married	Some College or AA degree	no	no												27602.2
2007-2008	41535	2	66	0.05	Yes		2007-2008	2	66	0	Female	Mexican American																3609.04
2007-2008	41536	2	60	5	Yes	No	2007-2008	2	60	44	Female	Non-Hispanic White	Married	Some College or AA degree	no	no	64.4444	9	0	40	100	100	70	40	100	30	100	70156.4
2007-2008	41537	1	60	1.36	Yes		2007-2008	1	60	16	Female	Non-Hispanic White		8th Grade														18652.5
2007-2008	41538	2	68	1.44	Yes	No	2007-2008	2	68	28	Male	Non-Hispanic Black	Never married	Some College or AA degree		no
2007-2008	41539	2	68	3.85	Yes	No	2007-2008	2	68	37	Male	Non-Hispanic White	Never married	College Graduate or above		no												112747
2007-2008	41540	1	63	1.48	No		2007-2008	1	63	19	Male	Mexican American		10th Grade														23600.4
2007-2008	41541	2	63	4.72	Yes	No	2007-2008	2	63	43	Female	Non-Hispanic White	Married	College Graduate or above	no	no	58.3333	9	0	0	100	70	15	60	100	80	100	58891.8
2007-2008	41542	1	59	1.16	Yes	No	2007-2008	1	59	60	Female	Non-Hispanic Black	Married	High School Grad/GED or Equivalent		no	51.6667	8	0	0	100	100	30	80		55	100	17066.6
2007-2008	41543	2	68	2.12			2007-2008	2	68	0	Female	Non-Hispanic Black
2007-2008	41544	1	61	5	Yes	No	2007-2008	1	61	27	Female	Non-Hispanic White	Never married	College Graduate or above	no	no
2007-2008	41545	2	70	1.27	No	No	2007-2008	2	70	40	Female	Mexican American	Married	Less Than 9th Grade	no	no	65	9	50	90	0	100	70	40	60	100	75	45156.3
2007-2008	41546	1	69	4.95	Yes	No	2007-2008	1	69	45	Female	Non-Hispanic White	Divorced	Some College or AA degree		no	84.4444	9	50	80	100	100	30	100	100	100	100	171491
2007-2008	41547	1	60	4.24	Yes	No	2007-2008	1	60	49	Male	Non-Hispanic White	Married	Some College or AA degree		no	70.5556	9	0	100	80	70	30	100	100	55	100	174925
2007-2008	41548	1	61	0.7	Yes	No	2007-2008	1	61	24	Female	Non-Hispanic White	Never married	9-11th Grade (Includes 12th grade with no diploma)	yes	no												44871.6
2007-2008	41549	2	65	0.29	Yes	No	2007-2008	2	65	61	Female	Non-Hispanic Black	Divorced	High School Grad/GED or Equivalent		no	55.5556	9	0	100	100	40	15	40	100	5	100	16794.8
2007-2008	41550	2	61	0.47	Yes	No	2007-2008	2	61	45	Male	Mexican American	Never married	High School Grad/GED or Equivalent		no	78.8889	9	50	100	25	100	100	60	100	100	75	13160
2007-2008	41551	2	66	5	Yes		2007-2008	2	66	1	Male	Non-Hispanic White																22510.8
2007-2008	41552	2	60	0.73	Yes	Yes	2007-2008	2	60	54	Male	Non-Hispanic White	Separated	Some College or AA degree		yes
2007-2008	41553	1	68	3.62	Yes		2007-2008	1	68	15	Female	Non-Hispanic Black		9th Grade														16350.5
2007-2008	41554	1	60	3.91	Yes		2007-2008	1	60	1	Male	Mexican American																6975.66
2007-2008	41555	1	71	0.6	Yes	No	2007-2008	1	71	78	Female	Non-Hispanic Black	Widowed	Less Than 9th Grade		no	48.3333	9	0	0	80	100	15	40	100	0	100	27965.6
2007-2008	41556	1	61	1.24	Yes	No	2007-2008	1	61	38	Male	Non-Hispanic White	Married	9-11th Grade (Includes 12th grade with no diploma)		no	34.4444	8	0	100	0	70	15	20		5	100	13327.9
2007-2008	41557	2	63	0.92	Yes	No	2007-2008	2	63	80	Female	Non-Hispanic White	Widowed	Less Than 9th Grade		no
2007-2008	41558	2	67	1.22	Yes	No	2007-2008	2	67	50	Female	Non-Hispanic Black	Divorced	9-11th Grade (Includes 12th grade with no diploma)		no												47209.4
2007-2008	41559	1	69	5	Yes		2007-2008	1	69	12	Female	Non-Hispanic White		7th Grade														48582.7
2007-2008	41560	2	69	0.14	Yes		2007-2008	2	69	1	Female	Other Hispanic																4477.26
2007-2008	41561	2	67	3.11	Yes		2007-2008	2	67	6	Male	Non-Hispanic Black		Never Attended / Kindergarten Only														5799.75
2007-2008	41562	2	66	5	Yes	No	2007-2008	2	66	50	Male	Non-Hispanic White	Never married	Some College or AA degree		no	42.7778	8	50	0	100	70	15	0		50	100	171590
2007-2008	41563	2	68	5	Yes	No	2007-2008	2	68	46	Female	Non-Hispanic White	Married	College Graduate or above		no												55769
2007-2008	41564	2	68	0.61	No		2007-2008	2	68	3	Male	Other Race - Including Multi-Racial																16152.6
2007-2008	41565	1	60	1.46	Yes	No	2007-2008	1	60	72	Male	Non-Hispanic White	Married	High School Grad/GED or Equivalent		no	62.7778	9	25	80	0	100	100	60	100	0	100	9019.23
2007-2008	41566	1	65	0.91	Yes		2007-2008	1	65	4	Male	Mexican American																23433.8
2007-2008	41567	1	68	2.92	Yes	No	2007-2008	1	68	51	Male	Other Hispanic	Married	Some College or AA degree		no	68.8889	9	80	90	0	40	70	40	100	100	100	14787.2
2007-2008	41568	1	66	0.39	Yes		2007-2008	1	66	8	Male	Mexican American		1st Grade														8806.8
2007-2008	41569	2	64	1.14	Yes	No	2007-2008	2	64	54	Male	Non-Hispanic Black	Married	9-11th Grade (Includes 12th grade with no diploma)		no
2007-2008	41570	2	59	0.76	No	Yes	2007-2008	2	59	55	Male	Non-Hispanic White	Separated	Less Than 9th Grade		yes	38.8889	9	0	0	0	0	100	40	60	100	50	25650.8
2007-2008	41571	1	61	0.29	Yes		2007-2008	1	61	5	Female	Non-Hispanic Black																36632.5
2007-2008	41572	1	69	1.83	Yes		2007-2008	1	69	17	Male	Non-Hispanic White		11th Grade														35775.1
2007-2008	41573	2	71	1.69	Yes	No	2007-2008	2	71	32	Female	Mexican American	Married	High School Grad/GED or Equivalent	no	no	84.4444	9	80	100	100	40	100	40	100	100	100	10721.9
2007-2008	41574	2	63	5	Yes	No	2007-2008	2	63	57	Male	Non-Hispanic White	Married	Some College or AA degree		yes	41.1111	9	25	0	0	40	70	0	60	75	100	117092
2007-2008	41575	2	71	3.43	Yes	No	2007-2008	2	71	76	Male	Mexican American	Divorced	Less Than 9th Grade		no												7069.39
2007-2008	41576	2	67	3	Yes	Yes	2007-2008	2	67	68	Male	Non-Hispanic Black	Married	9-11th Grade (Includes 12th grade with no diploma)		yes												8305.51
2007-2008	41577	2	61	2.62	Yes	No	2007-2008	2	61	27	Female	Mexican American	Married	Some College or AA degree	no	no
2007-2008	41578	1	60	5	Yes	Yes	2007-2008	1	60	67	Female	Non-Hispanic White	Married	College Graduate or above		no	91.6667	9	80	90	100	100	100	100	100	55	100	72013.9
2007-2008	41579	2	60	3	Yes	No	2007-2008	2	60	71	Female	Non-Hispanic White	Married	High School Grad/GED or Equivalent		no	75	9	50	100	75	100	100	40	60	50	100	52370.3
2007-2008	41580	2	72	0.19	Yes		2007-2008	2	72	0	Female	Mexican American																14748.4
2007-2008	41581	1	59	2.77	Yes	No	2007-2008	1	59	60	Male	Non-Hispanic Black	Married	High School Grad/GED or Equivalent		no												4656.87
2007-2008	41582	2	61	0.66	Yes		2007-2008	2	61	2	Female	Other Hispanic																17916.4
2007-2008	41583	2	69		Yes	No	2007-2008	2	69	66	Female	Other Hispanic	Married	Less Than 9th Grade		no	53.3333	9	80	0	100	100	15	0	60	50	75	3153.3
2007-2008	41584	2	64	1.82	Yes		2007-2008	2	64	16	Female	Non-Hispanic White		10th Grade														74832.3
2007-2008	41585	1	71	0.61	Yes		2007-2008	1	71	0	Male	Mexican American																3992.35
2007-2008	41586	1	70	2.08	Yes		2007-2008	1	70	8	Female	Mexican American		2nd Grade
2007-2008	41587	2	68	0.86	Yes	No	2007-2008	2	68	44	Female	Non-Hispanic Black	Never married	Some College or AA degree	no	no	75.5556	9	50	0	100	100	70	60	100	100	100	23354
2007-2008	41588	2	63	1.23	Yes		2007-2008	2	63	11	Male	Non-Hispanic White		5th Grade														25405.9
2007-2008	41589	1	66	1.4	Yes	No	2007-2008	1	66	76	Male	Mexican American	Married	College Graduate or above		no												9489.22
2007-2008	41590	1	66	2.33	No	No	2007-2008	1	66	25	Male	Mexican American	Married	Some College or AA degree		no	81.1111	9	50	40	100	100	100	40	100	100	100	21036.1
2007-2008	41591	2	60	1.14	Yes		2007-2008	2	60	8	Male	Non-Hispanic White		2nd Grade														13871.7
2007-2008	41592	1	70	1.75	Yes	No	2007-2008	1	70	33	Female	Mexican American	Never married		no	no
2007-2008	41593	1	68	0.87	Yes		2007-2008	1	68	6	Female	Non-Hispanic Black		Never Attended / Kindergarten Only														21153.4
2007-2008	41594	2	69	5	Yes	No	2007-2008	2	69	38	Male	Non-Hispanic White	Never married	Some College or AA degree		no	73.8889	9	80	100	75	70	70	20	100	50	100	66964.4
2007-2008	41595	1	60	1.03	Yes	No	2007-2008	1	60	76	Female	Non-Hispanic White	Widowed	9-11th Grade (Includes 12th grade with no diploma)		no	74.4444	9	0	100	0	70	100	100	100	100	100	33101.8
2007-2008	41596	2	72	1.47			2007-2008	2	72	6	Male	Other Hispanic		Never Attended / Kindergarten Only														7616.03
2007-2008	41597	1	62	0.47	Yes	No	2007-2008	1	62	61	Male	Other Hispanic	Married	Less Than 9th Grade		no
2007-2008	41598	1	66		No		2007-2008	1	66	12	Male	Mexican American		5th Grade														13892.6
2007-2008	41599	2	65	2.64	Yes	No	2007-2008	2	65	52	Female	Other Hispanic	Married	Some College or AA degree		no	77.7778	9	80	100	100	70	30	20	100	100	100	39935.2
2007-2008	41600	2	67	1.45	Yes	No	2007-2008	2	67	29	Male	Other Hispanic	Married	9-11th Grade (Includes 12th grade with no diploma)		no	52.2222	7	0	100	0	100	70			100	100	49814.1
2007-2008	41601	1	68	1.99	Yes		2007-2008	1	68	7	Male	Non-Hispanic Black		Never Attended / Kindergarten Only														6374.44
2007-2008	41602	1	71	1.21	Yes		2007-2008	1	71	5	Male	Other Hispanic																11479.4
2007-2008	41603	1	70	0.7	Yes		2007-2008	1	70	7	Female	Mexican American		1st Grade														9614.17
2007-2008	41604	2	68	3.3	Yes		2007-2008	2	68	7	Female	Non-Hispanic Black		Never Attended / Kindergarten Only														5465.48
2007-2008	41605	2	59	0.6	No	No	2007-2008	2	59	36	Female	Non-Hispanic White	Married	Some College or AA degree	no	no	78.3333	9	25	100	100	100	70	60	100	50	100	29595.2
2007-2008	41606	2	63	5	Yes		2007-2008	2	63	8	Male	Non-Hispanic White		1st Grade
2007-2008	41607	2	64	5	Yes	No	2007-2008	2	64	46	Female	Non-Hispanic White	Married	High School Grad/GED or Equivalent		no	84.4444	9	80	100	75	100	70	60	100	75	100	151382
2007-2008	41608	2	59	3.77	Yes		2007-2008	2	59	17	Female	Non-Hispanic White		10th Grade														33980.3
2007-2008	41609	2	70		Yes		2007-2008	2	70	11	Male	Non-Hispanic Black		6th Grade														4454.62
2007-2008	41610	1	69	0.63	Yes	Yes	2007-2008	1	69	67	Female	Other Hispanic	Married	High School Grad/GED or Equivalent		no												5033.1
2007-2008	41611	1	65	0.8	Yes	Yes	2007-2008	1	65	75	Female	Non-Hispanic White	Widowed	High School Grad/GED or Equivalent		no	58.3333	7	80	100	75	70	70			30	100	26793.4
2007-2008	41612	2	60	2.14	Yes	No	2007-2008	2	60	80	Female	Non-Hispanic White	Married	9-11th Grade (Includes 12th grade with no diploma)		no	64.4444	9	50	0	100	100	70	0	60	100	100	31429.7
2007-2008	41613	2	70	5	Yes	No	2007-2008	2	70	71	Male	Non-Hispanic Black	Married	College Graduate or above		no	62.7778	9	50	0	75	90	30	80	40	100	100	5746.61
2007-2008	41614	2	65	5	Yes		2007-2008	2	65	2	Female	Non-Hispanic White																40913
2007-2008	41615	1	60	1.28	No		2007-2008	1	60	17	Female	Non-Hispanic White		10th Grade		no												18652.5
2007-2008	41616	2	67	1.11	Yes	No	2007-2008	2	67	67	Female	Non-Hispanic Black	Divorced	9-11th Grade (Includes 12th grade with no diploma)		no	75.5556	9	80	60	75	100	30	80	100	55	100	9506.47
2007-2008	41617	1	68	1.47	Yes		2007-2008	1	68	80	Female	Non-Hispanic White	Widowed	High School Grad/GED or Equivalent		no
2007-2008	41618	2	64	5	Yes	No	2007-2008	2	64	46	Female	Non-Hispanic White	Married	Some College or AA degree		no	57.7778	9	50	100	100	70	15	40	40	30	75	138706
2007-2008	41619	1	62	0.62	Yes	No	2007-2008	1	62	20	Male	Mexican American	Never married	9-11th Grade (Includes 12th grade with no diploma)		no	67.7778	9	50	100	100	90	0	40	100	80	50	12737.8
2007-2008	41620	1	59	1.01	Yes		2007-2008	1	59	9	Male	Non-Hispanic White		2nd Grade
2007-2008	41621	1	59	0.47	Yes		2007-2008	1	59	1	Female	Non-Hispanic Black																7442.14
2007-2008	41622	1	61	1.04	Yes	No	2007-2008	1	61	41	Female	Non-Hispanic White	Married	High School Grad/GED or Equivalent	no	no	66.6667	9	0	0	100	100	0	100	100	100	100	48341.4
2007-2008	41623	1	68	2.91	Yes	No	2007-2008	1	68	29	Male	Non-Hispanic Black	Married	College Graduate or above		no	85.5556	9	80	100	100	100	15	100	100	75	100	17111.4
2007-2008	41624	2	66	2.71	Yes	No	2007-2008	2	66	68	Female	Other Hispanic	Married	Less Than 9th Grade		no	75.5556	9	50	100	100	100	70	40	40	80	100	8387.98
2007-2008	41625	1	66	0.4	No	No	2007-2008	1	66	26	Female	Mexican American	Separated	Less Than 9th Grade	no	no	76.6667	9	0	100	100	100	30	60	100	100	100	11874.3
2007-2008	41626	2	68	4.44	Yes	No	2007-2008	2	68	24	Male	Other Hispanic	Never married	Some College or AA degree		no	75.5556	9	50	100	0	100	70	60	100	100	100	42298.4
2007-2008	41627	1	68	5	Yes	Yes	2007-2008	1	68	80	Female	Non-Hispanic White	Married	High School Grad/GED or Equivalent		no	87.2222	9	100	100	75	100	100	80	100	30	100	48726.5
2007-2008	41628	2	59	0.79	Yes	No	2007-2008	2	59	23	Female	Non-Hispanic White	Divorced	Some College or AA degree	no	no	86.1111	9	25	100	50	100	100	100	100	100	100	49998.4
2007-2008	41629	1	72		Yes	No	2007-2008	1	72	23	Female	Other Hispanic	Never married	9-11th Grade (Includes 12th grade with no diploma)	no	no												13483.3
2007-2008	41630	2	60	3.13	Yes		2007-2008	2	60	15	Male	Other Hispanic		9th Grade														7467.49
2007-2008	41631	1	59	0.46	Yes		2007-2008	1	59	2	Male	Non-Hispanic White
2007-2008	41632	2	71	3.3	Yes		2007-2008	2	71	0	Male	Mexican American																2489.74
2007-2008	41633	2	67	1.19	Yes		2007-2008	2	67	16	Male	Non-Hispanic Black		8th Grade														25064
2007-2008	41634	2	65	0.47	Yes		2007-2008	2	65	1	Male	Mexican American																6526.44
2007-2008	41635	1	65	1.21	No		2007-2008	1	65	19	Male	Mexican American		10th Grade														9141.65
2007-2008	41636	2	70	1.81	No	No	2007-2008	2	70	61	Female	Mexican American	Married	High School Grad/GED or Equivalent		no	70.5556	9	25	90	100	100	70	0	100	50	100	6141.92
2007-2008	41637	1	64		No	No	2007-2008	1	64	27	Male	Mexican American	Never married	High School Grad/GED or Equivalent		no	92.2222	9	80	100	80	100	70	100	100	100	100	12917
2007-2008	41638	1	69	2.49	Yes		2007-2008	1	69	8	Male	Other Hispanic		2nd Grade														5911.3
2007-2008	41639	1	66	2.21	Yes	No	2007-2008	1	66	37	Male	Mexican American	Separated	College Graduate or above		no	72.7778	9	25	0	100	100	30	100	100	100	100	22367.7
2007-2008	41640	2	61	0.17	Yes		2007-2008	2	61	13	Male	Non-Hispanic White		6th Grade		no												51593.2
2007-2008	41641	1	69		Yes	No	2007-2008	1	69	80	Female	Non-Hispanic White	Widowed	Some College or AA degree		no	77.7778	9	80	100	100	100	30	40	100	50	100	38905.5
2007-2008	41642	1	63	1.57	Yes	No	2007-2008	1	63	73	Female	Non-Hispanic White	Widowed	High School Grad/GED or Equivalent		no	80	9	100	100	100	100	70	40	60	50	100	32678.6
2007-2008	41643	2	67	1.73	No		2007-2008	2	67	19	Female	Non-Hispanic White		More than high school														51227
2007-2008	41644	1	64	1.4	Yes		2007-2008	1	64	13	Female	Non-Hispanic Black		7th Grade														9870.68
2007-2008	41645	2	60	0.34	Yes		2007-2008	2	60	0	Male	Non-Hispanic White																32195.3
2007-2008	41646	2	72	0.7	No		2007-2008	2	72	4	Male	Mexican American																10329.6
2007-2008	41647	2	68	0.44	Yes		2007-2008	2	68	0	Female	Mexican American																3125.26
2007-2008	41648	2	61	5	Yes	No	2007-2008	2	61	58	Male	Non-Hispanic White	Married	High School Grad/GED or Equivalent		no	69.4444	9	0	100	100	70	70	80	100	5	100	96647.5
2007-2008	41649	2	67	1.65	Yes		2007-2008	2	67	0	Female	Other Race - Including Multi-Racial																16838.5
2007-2008	41650	1	61	1.45	Yes		2007-2008	1	61	11	Female	Non-Hispanic White		5th Grade														74625.4
2007-2008	41651	1	63	1.28	Yes		2007-2008	1	63	3	Female	Mexican American																8238.95
2007-2008	41652	2	67	3.21	Yes	No	2007-2008	2	67	70	Female	Other Race - Including Multi-Racial	Married	College Graduate or above		no	84.4444	9	100	100	100	100	70	60	100	30	100	38748.5
2007-2008	41653	1	70	5	Yes		2007-2008	1	70	19	Male	Other Race - Including Multi-Racial		High School Graduate														140549
2007-2008	41654	2	74	3.93	Yes	No	2007-2008	2	74	80	Female	Non-Hispanic White	Widowed	Less Than 9th Grade		no												28798.8
2007-2008	41655	1	61	0.58	Yes		2007-2008	1	61	2	Female	Non-Hispanic White																8332.13
2007-2008	41656	2	72	0.03	Yes		2007-2008	2	72	14	Female	Mexican American		8th Grade														6735.17
2007-2008	41657	2	63	2.02	Yes		2007-2008	2	63	8	Male	Non-Hispanic White		1st Grade														65603
2007-2008	41658	2	69	2.19	Yes		2007-2008	2	69	1	Male	Other Race - Including Multi-Racial																19074.5
2007-2008	41659	2	67	2.46	Yes		2007-2008	2	67	15	Female	Non-Hispanic White		9th Grade														67218.6
2007-2008	41660	2	68		Yes		2007-2008	2	68	8	Female	Other Race - Including Multi-Racial		1st Grade		no
2007-2008	41661	1	68	1.11	Yes		2007-2008	1	68	1	Female	Non-Hispanic Black																15262
2007-2008	41662	2	72	0.65	No		2007-2008	2	72	1	Male	Mexican American																4965.08
2007-2008	41663	1	66	1.57	No	No	2007-2008	1	66	32	Female	Mexican American	Married	9-11th Grade (Includes 12th grade with no diploma)	no	no	78.8889	9	50	80	80	70	70	60	100	100	100	54259.1
2007-2008	41664	1	61	1.27	Yes	No	2007-2008	1	61	64	Male	Non-Hispanic White	Divorced	Some College or AA degree		no												45558.8
2007-2008	41665	2	64	1.13			2007-2008	2	64	0	Male	Other Race - Including Multi-Racial																4503.68
2007-2008	41666	1	59	2.9	Yes	No	2007-2008	1	59	43	Female	Non-Hispanic White	Married	Some College or AA degree	no	no	58.8889	9	0	100	75	100	30	20	100	30	75	125745
2007-2008	41667	1	67	1.16	No		2007-2008	1	67	2	Male	Non-Hispanic White																12510.9
2007-2008	41668	2	62	5	Yes	No	2007-2008	2	62	66	Male	Non-Hispanic Black	Married	College Graduate or above		no	81.1111	9	50	100	100	70	70	80	60	100	100	9316.24
2007-2008	41669	1	59	4.31	Yes	No	2007-2008	1	59	22	Male	Non-Hispanic Black	Never married	Some College or AA degree		no
2007-2008	41670	1	65	1.37	No	No	2007-2008	1	65	27	Male	Non-Hispanic Black	Living with partner	9-11th Grade (Includes 12th grade with no diploma)		no	57.7778	9	0	100	0	40	30	100	100	100	50	30061.7
2007-2008	41671	2	60	1.92	Yes	Yes	2007-2008	2	60	80	Male	Non-Hispanic White	Divorced	High School Grad/GED or Equivalent		no	60	9	50	0	100	40	70	20	60	100	100	25945.1
2007-2008	41672	2	70	2.56	Yes	No	2007-2008	2	70	63	Female	Mexican American	Married	9-11th Grade (Includes 12th grade with no diploma)		no	72.2222	9	80	100	100	40	100	40	60	30	100	7556.11
2007-2008	41673	1	72	3.55	Yes		2007-2008	1	72	3	Male	Other Race - Including Multi-Racial
2007-2008	41674	2	74	2.69	No	No	2007-2008	2	74	25	Male	Non-Hispanic Black	Married	Some College or AA degree		no												15119.5
2007-2008	41675	2	59	1.15	Yes	Yes	2007-2008	2	59	71	Female	Non-Hispanic White	Widowed	High School Grad/GED or Equivalent		no	46.1111	9	0	0	0	70	100	100	40	80	25	20906.5
2007-2008	41676	2	63	1.96	Yes	No	2007-2008	2	63	61	Female	Non-Hispanic White	Living with partner	Some College or AA degree		no	78.8889	9	50	100	75	100	100	60	100	25	100	50294.4
2007-2008	41677	2	68	3.02	Yes	No	2007-2008	2	68	71	Male	Non-Hispanic White	Married	High School Grad/GED or Equivalent		no	53.8889	9	25	80	80	100	15	20	60	5	100	27224.5
2007-2008	41678	2	64	0.34	Yes		2007-2008	2	64	17	Male	Non-Hispanic Black		11th Grade														12693.5
2007-2008	41679	1	61	1.97	No	No	2007-2008	1	61	21	Male	Non-Hispanic White	Never married	9-11th Grade (Includes 12th grade with no diploma)		no	63.8889	9	25	0	50	90	100	60	100	50	100	55315.2
2007-2008	41680	1	67	1.24	Yes	No	2007-2008	1	67	63	Male	Non-Hispanic Black	Married	High School Grad/GED or Equivalent		no	63.8889	9	80	100	100	70	0	80	40	5	100	13151
2007-2008	41681	1	60	0.81	No		2007-2008	1	60	14	Female	Non-Hispanic White		8th Grade														52685.8
2007-2008	41682	1	63		Yes	No	2007-2008	1	63	44	Female	Non-Hispanic White	Married	College Graduate or above	no	no	82.7778	9	80	60	75	100	70	60	100	100	100	57634
2007-2008	41683	2	62	5	Yes	Yes	2007-2008	2	62	72	Male	Non-Hispanic White	Married	Some College or AA degree		yes	77.7778	9	80	100	80	90	70	40	60	80	100	38237.5
2007-2008	41684	2	62	2.04	Yes		2007-2008	2	62	10	Female	Other Hispanic		4th Grade														4496.38
2007-2008	41685	1	61	0.94	No	No	2007-2008	1	61	25	Male	Non-Hispanic White	Never married	High School Grad/GED or Equivalent		no	86.6667	9	0	100	80	100	100	100	100	100	100	26146.7
2007-2008	41686	2	67	4.01	Yes		2007-2008	2	67	5	Female	Non-Hispanic White																39224.1
2007-2008	41687	2	70	1.81	No	No	2007-2008	2	70	31	Male	Mexican American	Married	9-11th Grade (Includes 12th grade with no diploma)		no	68.3333	9	0	0	100	100	100	40	100	100	75	86481.9
2007-2008	41688	1	67	1.9	No	No	2007-2008	1	67	49	Male	Non-Hispanic White	Married	9-11th Grade (Includes 12th grade with no diploma)		no	65.5556	9	25	100	0	100	70	20	100	75	100	55874.4
2007-2008	41689	1	66	1.09	Yes		2007-2008	1	66	12	Male	Mexican American		6th Grade														28473.5
2007-2008	41690	2	65	5	Yes	No	2007-2008	2	65	52	Male	Mexican American	Married	College Graduate or above		no	73.8889	9	0	100	75	100	30	100	60	100	100	20704.6
2007-2008	41691	2	63	5	Yes	No	2007-2008	2	63	60	Male	Non-Hispanic White	Married	High School Grad/GED or Equivalent		no	69.4444	9	25	100	100	100	30	40	100	30	100	80731.5
2007-2008	41692	1	73	5	Yes		2007-2008	1	73	5	Female	Mexican American																9030.76
2007-2008	41693	1	74	5	Yes	No	2007-2008	1	74	50	Male	Non-Hispanic Black	Widowed	Some College or AA degree		no	55	9	0	100	0	70	15	60	100	50	100	10700.2
2007-2008	41694	2	61		No	No	2007-2008	2	61	60	Female	Other Hispanic	Divorced	Some College or AA degree		no	79.4444	9	80	100	75	70	70	20	100	100	100	8866.76
2007-2008	41695	2	64	1.4	Yes		2007-2008	2	64	4	Female	Non-Hispanic White																9948.33
2007-2008	41696	2	66	4.58	Yes		2007-2008	2	66	12	Male	Mexican American		6th Grade														12253.3
2007-2008	41697	2	69		Yes	No	2007-2008	2	69	28	Female	Other Hispanic	Married	Less Than 9th Grade	no	no	88.3333	9	25	100	100	100	70	100	100	100	100	7502
2007-2008	41698	1	69	4.14	Yes	No	2007-2008	1	69	42	Male	Non-Hispanic White	Married	Some College or AA degree		no	53.3333	9	25	0	100	100	30	40	60	50	75	102299
2007-2008	41699	1	65	4.75	Yes	No	2007-2008	1	65	51	Male	Non-Hispanic Black	Married	Some College or AA degree		no												15863.5
2007-2008	41700	1	67	1.28	Yes	No	2007-2008	1	67	55	Male	Non-Hispanic White	Living with partner	9-11th Grade (Includes 12th grade with no diploma)		no	61.6667	9	0	100	0	70	70	60	100	80	75	13365.1
2007-2008	41701	1	64	1.94	Yes		2007-2008	1	64	13	Female	Non-Hispanic Black		5th Grade														39620.8
2007-2008	41702	1	59	3.43	Yes	No	2007-2008	1	59	55	Female	Non-Hispanic Black	Divorced	High School Grad/GED or Equivalent		no	42.2222	9	0	0	100	100	0	20	60	25	75	32574.3
2007-2008	41703	2	61	0.28	Yes		2007-2008	2	61	0	Female	Other Hispanic																2906.33
2007-2008	41704	2	66	3.68	Yes		2007-2008	2	66	16	Male	Mexican American		10th Grade														3898.5
2007-2008	41705	2	59	2.42	Yes	No	2007-2008	2	59	62	Male	Non-Hispanic Black	Married	High School Grad/GED or Equivalent		yes	61.1111	9	25	100	0	100	100	40	60	25	100	13459.6
2007-2008	41706	2	65	1.94	Yes		2007-2008	2	65	8	Male	Non-Hispanic Black		1st Grade
2007-2008	41707	2	72		Yes	No	2007-2008	2	72	51	Male	Mexican American		High School Grad/GED or Equivalent		no
2007-2008	41708	2	63	4.72	Yes	No	2007-2008	2	63	37	Female	Non-Hispanic White	Married	Some College or AA degree	no	no	71.1111	9	0	100	100	70	70	100	100	50	50	141025
2007-2008	41709	2	63	2.97	Yes		2007-2008	2	63	10	Male	Non-Hispanic White		4th Grade
2007-2008	41710	1	70	1.47	No	No	2007-2008	1	70	23	Male	Mexican American	Married	Some College or AA degree		no	66.6667	7	0	100	100	100	100			100	100	20325
2007-2008	41711	1	71	3.65	Yes	No	2007-2008	1	71	73	Female	Non-Hispanic White	Married	High School Grad/GED or Equivalent		no	78.8889	9	25	100	100	100	70	60	100	55	100	43783.5
2007-2008	41712	1	72	2.35	Yes		2007-2008	1	72	0	Female	Non-Hispanic Black
2007-2008	41713	1	60	1.28	No	No	2007-2008	1	60	42	Male	Non-Hispanic White	Married	Some College or AA degree		no	73.3333	9	0	100	0	100	100	60	100	100	100	13353.2
2007-2008	41714	1	63	1.81	Yes		2007-2008	1	63	7	Female	Non-Hispanic Black		1st Grade														4972.93
2007-2008	41715	1	62	1.46	Yes	No	2007-2008	1	62	74	Female	Non-Hispanic White	Married	High School Grad/GED or Equivalent		yes	88.3333	9	80	100	100	100	100	60	100	55	100	34621.2
2007-2008	41716	2	62	0.71	Yes		2007-2008	2	62	0	Male	Non-Hispanic White																32128.5
2007-2008	41717	1	67	2.34	Yes	No	2007-2008	1	67	72	Female	Non-Hispanic White	Married	9-11th Grade (Includes 12th grade with no diploma)		no	73.8889	9	80	100	75	100	100	80	30	0	100	44296.9
2007-2008	41718	1	66	0.64	No	No	2007-2008	1	66	50	Female	Mexican American	Married	Less Than 9th Grade		no	60.5556	9	80	0	100	100	15	40	60	50	100	9565.13
2007-2008	41719	1	66	1.46	Yes		2007-2008	1	66	18	Male	Mexican American		11th Grade														33878.8
2007-2008	41720	1	71	1.34	Yes		2007-2008	1	71	8	Female	Mexican American		2nd Grade		no												6447.81
2007-2008	41721	1	64	0.84	No	No	2007-2008	1	64	37	Male	Non-Hispanic White	Married	9-11th Grade (Includes 12th grade with no diploma)		no	64.4444	9	0	100	0	70	70	40	100	100	100	13540.5
2007-2008	41722	1	73	1.21	Yes		2007-2008	1	73	15	Male	Other Hispanic		9th Grade														6428.84
2007-2008	41723	1	68	0.41	Yes		2007-2008	1	68	1	Male	Non-Hispanic Black																5222.96
2007-2008	41724	2	68	1.63	Yes	No	2007-2008	2	68	27	Male	Non-Hispanic Black	Never married	College Graduate or above		no	61.6667	9	0	80	100	70	30	0	100	75	100	45127.9
2007-2008	41725	1	66	1.05	Yes	No	2007-2008	1	66	77	Female	Non-Hispanic White	Widowed	High School Grad/GED or Equivalent		no	78.8889	9	80	100	100	100	70	60	100	25	75	25250.8
2007-2008	41726	2	65	1.41	Yes		2007-2008	2	65	8	Female	Other Hispanic		1st Grade														20182.9
2007-2008	41727	1	69	4.95	Yes	No	2007-2008	1	69	22	Female	Non-Hispanic White	Never married	College Graduate or above	no	no	72.2222	9	50	100	100	100	30	40	100	80	50	212011
2007-2008	41728	2	65	5	Yes	No	2007-2008	2	65	47	Female	Non-Hispanic White	Married	College Graduate or above		no	100	9	100	100	100	100	100	100	100	100	100	87517.3
2007-2008	41729	2	63	5	Yes	No	2007-2008	2	63	53	Male	Non-Hispanic White	Married	9-11th Grade (Includes 12th grade with no diploma)		no	51.1111	9	25	40	50	100	15	40	60	30	100	77380.2
2007-2008	41730	1	70	1.16	No	No	2007-2008	1	70	35	Male	Mexican American	Married	9-11th Grade (Includes 12th grade with no diploma)		no	62.7778	9	25	100	0	100	70	20	100	100	50	22797.2
2007-2008	41731	2	71	0.51	Yes	No	2007-2008	2	71	46	Female	Mexican American	Never married	High School Grad/GED or Equivalent		no												37209.9
2007-2008	41732	1	66	1.16	Yes		2007-2008	1	66	12	Female	Mexican American		5th Grade														47065.9
2007-2008	41733	1	61	5	Yes	No	2007-2008	1	61	38	Male	Non-Hispanic White	Never married	High School Grad/GED or Equivalent		no	68.3333	9	25	100	100	70	30	60	100	30	100	73615.7
2007-2008	41734	2	71	2.02	Yes		2007-2008	2	71	14	Female	Mexican American		8th Grade														12918.7
2007-2008	41735	2	62	5	Yes	Yes	2007-2008	2	62	64	Female	Non-Hispanic White	Married	College Graduate or above		no	78.8889	9	25	100	100	100	70	60	100	55	100	68681.7
2007-2008	41736	1	67	1.1	Yes		2007-2008	1	67	14	Male	Non-Hispanic White		9th Grade														28088.1
2007-2008	41737	1	69	3.79	Yes	No	2007-2008	1	69	28	Female	Non-Hispanic Black	Separated	9-11th Grade (Includes 12th grade with no diploma)	no	no	76.6667	9	25	40	100	100	100	100	100	75	50	52526.4
2007-2008	41738	2	72	4.48	Yes		2007-2008	2	72	1	Female	Non-Hispanic Black																8698.49
2007-2008	41739	1	72	0.99	Yes	No	2007-2008	1	72	69	Male	Non-Hispanic Black	Never married	Less Than 9th Grade		no	47.7778	9	25	0	100	20	30	60	40	55	100	7467.24
2007-2008	41740	2	68	2.88	Yes	Yes	2007-2008	2	68	79	Male	Non-Hispanic Black	Separated	College Graduate or above		no	67.7778	9	100	100	100	40	70	40	60	0	100	7462.92
2007-2008	41741	1	69	2.45	Yes	No	2007-2008	1	69	67	Female	Non-Hispanic White	Widowed	College Graduate or above		no
2007-2008	41742	2	61	0.42	Yes		2007-2008	2	61	5	Male	Other Hispanic																10290.1
2007-2008	41743	1	62	2.52	No	No	2007-2008	1	62	28	Male	Mexican American	Never married	High School Grad/GED or Equivalent		no												21599.9
2007-2008	41744	2	74	1.36	Yes		2007-2008	2	74	0	Female	Mexican American																3231.19
2007-2008	41745	2	72	1.06	Yes		2007-2008	2	72	3	Female	Non-Hispanic White																15744.6
2007-2008	41746	2	71	2.5	Yes		2007-2008	2	71	3	Female	Non-Hispanic Black																9124.4
2007-2008	41747	2	60	2.17	Yes		2007-2008	2	60	11	Female	Non-Hispanic Black		5th Grade														4642.07
2007-2008	41748	1	66	0.73	Yes	Yes	2007-2008	1	66	62	Female	Mexican American	Divorced	High School Grad/GED or Equivalent		no
2007-2008	41749	1	65	2.1	Yes	No	2007-2008	1	65	28	Female	Mexican American	Married	Some College or AA degree	no	no												8369.07
2007-2008	41750	2	73	5	Yes	No	2007-2008	2	73	34	Male	Non-Hispanic Black	Never married	Some College or AA degree		no												20586.4
2007-2008	41751	2	59	2.56	Yes	No	2007-2008	2	59	73	Female	Non-Hispanic White	Married	High School Grad/GED or Equivalent		no	71.1111	9	100	100	100	90	0	80	40	30	100	20157.7
2007-2008	41752	1	68	1.34	Yes		2007-2008	1	68	8	Female	Non-Hispanic Black		1st Grade														4910.47
2007-2008	41753	2	60	2.88	Yes	No	2007-2008	2	60	78	Male	Non-Hispanic White	Widowed	Some College or AA degree		no												59676.8
2007-2008	41754	2	63	3.77	Yes	No	2007-2008	2	63	32	Male	Non-Hispanic White	Married	9-11th Grade (Includes 12th grade with no diploma)		no												16053.5
2007-2008	41755	1	67	1.76	Yes	No	2007-2008	1	67	79	Female	Non-Hispanic White	Widowed	9-11th Grade (Includes 12th grade with no diploma)		no	59.4444	9	80	0	75	100	70	20	60	55	75	29441.9
2007-2008	41756	2	65	2.27	Yes	No	2007-2008	2	65	60	Female	Mexican American	Married	Less Than 9th Grade		no												5806.65
2007-2008	41757	2	67	0.87	Yes		2007-2008	2	67	18	Male	Non-Hispanic Black		More than high school														7727.98
2007-2008	41758	2	64		No	No	2007-2008	2	64	28	Male	Mexican American	Never married	Less Than 9th Grade		no	75.5556	9	80	100	0	100	100	40	60	100	100	13430.2
2007-2008	41759	2	59	1.01	No	No	2007-2008	2	59	41	Male	Non-Hispanic White	Married	9-11th Grade (Includes 12th grade with no diploma)		no												43024
2007-2008	41760	1	67	1.57	Yes	No	2007-2008	1	67	73	Female	Non-Hispanic White	Widowed	High School Grad/GED or Equivalent		no	76.6667	9	25	100	100	100	70	40	100	55	100	52495.2
2007-2008	41761	2	70	5	Yes	No	2007-2008	2	70	54	Female	Non-Hispanic White	Married	College Graduate or above		no	93.3333	9	80	100	100	100	100	60	100	100	100	69666.8
2007-2008	41762	2	68	5	Yes	No	2007-2008	2	68	32	Male	Non-Hispanic White	Never married	College Graduate or above		yes	60.5556	9	25	0	80	100	30	60	100	75	75	133653
2007-2008	41763	1	66	1.16	Yes		2007-2008	1	66	6	Male	Mexican American		Never Attended / Kindergarten Only		no												15624
2007-2008	41764	1	60	4.84	Yes	No	2007-2008	1	60	54	Male	Non-Hispanic White	Married	College Graduate or above		no	80.5556	9	80	100	75	100	70	60	60	80	100	113019
2007-2008	41765	1	66	2.66	Yes	No	2007-2008	1	66	23	Female	Mexican American	Married	College Graduate or above	no	no
2007-2008	41766	1	65	0.31	Yes		2007-2008	1	65	0	Female	Mexican American																7837.83
2007-2008	41767	2	71	0.48	No	No	2007-2008	2	71	21	Male	Mexican American	Never married	9-11th Grade (Includes 12th grade with no diploma)		no	91.6667	9	50	100	100	100	100	100	100	75	100	58107.8
2007-2008	41768	1	65	5	Yes	No	2007-2008	1	65	57	Female	Mexican American	Married	College Graduate or above		no	72.7778	9	25	0	100	100	70	80	100	80	100	12456.5
2007-2008	41769	1	65	0.12	Yes		2007-2008	1	65	1	Male	Non-Hispanic White																6307.04
2007-2008	41770	1	72	1.24	Yes	No	2007-2008	1	72	71	Female	Other Hispanic	Widowed	Less Than 9th Grade		no	52.2222	9	50	0	100	40	30	20	100	30	100	6211.94
2007-2008	41771	1	62	2.45	Yes	No	2007-2008	1	62	80	Female	Other Hispanic	Widowed	9-11th Grade (Includes 12th grade with no diploma)		no	71.1111	9	50	100	100	100	70	20	100	0	100	8082.61
2007-2008	41772	2	61	2.86	Yes	No	2007-2008	2	61	69	Male	Other Hispanic	Married	9-11th Grade (Includes 12th grade with no diploma)		no												15197.8
2007-2008	41773	2	59	0.66	Yes		2007-2008	2	59	4	Female	Non-Hispanic White																46227.2
2007-2008	41774	1	68	5	Yes		2007-2008	1	68	11	Male	Non-Hispanic Black		5th Grade														23328.3
2007-2008	41775	1	68	1.39	No	No	2007-2008	1	68	61	Female	Non-Hispanic Black	Never married	9-11th Grade (Includes 12th grade with no diploma)		no	52.7778	9	0	0	100	100	30	40	100	5	100	8981.56
2007-2008	41776	2	71	1.64	Yes	No	2007-2008	2	71	48	Female	Mexican American	Married	Some College or AA degree		no	66.1111	9	0	0	100	100	100	20	100	75	100	12051.6
2007-2008	41777	1	60	3.91	Yes		2007-2008	1	60	11	Female	Mexican American		5th Grade														12442.3
2007-2008	41778	1	63	2.49	Yes		2007-2008	1	63	14	Female	Non-Hispanic Black		8th Grade														15816.5
2007-2008	41779	1	61	0.78	No		2007-2008	1	61	18	Female	Non-Hispanic White		GED or Equivalent														124679
2007-2008	41780	1	67	0.98	Yes	Yes	2007-2008	1	67	64	Female	Non-Hispanic White	Divorced	9-11th Grade (Includes 12th grade with no diploma)		no	39.4444	9	0	0	100	90	0	20	40	80	25	22049.8
2007-2008	41781	2	66	0.47	Yes		2007-2008	2	66	1	Male	Mexican American																7865.46
2007-2008	41782	1	61	4.38	Yes	No	2007-2008	1	61	66	Male	Non-Hispanic White	Married	High School Grad/GED or Equivalent		yes	42.7778	8	25	0	0	70	30	80		80	100	44804.9
2007-2008	41783	1	67	1.57	Yes	Yes	2007-2008	1	67	80	Female	Non-Hispanic White	Widowed	College Graduate or above		no	82.2222	9	80	100	100	100	70	60	100	30	100	31361.8
2007-2008	41784	1	70	0.39	Yes		2007-2008	1	70	4	Female	Mexican American																6607.13
2007-2008	41785	2	60	1.25	Yes	Yes	2007-2008	2	60	34	Female	Non-Hispanic White	Divorced	9-11th Grade (Includes 12th grade with no diploma)	no	no	50.5556	9	50	100	0	40	15	0	100	50	100	20655.3
2007-2008	41786	1	69	0.71	No	No	2007-2008	1	69	43	Male	Mexican American	Married	Less Than 9th Grade		no
2007-2008	41787	2	64	0.34	Yes		2007-2008	2	64	5	Female	Non-Hispanic Black																10792.3
2007-2008	41788	2	62	1.79	Yes	No	2007-2008	2	62	38	Female	Non-Hispanic White	Never married	9-11th Grade (Includes 12th grade with no diploma)	no	no	64.4444	9	25	0	100	40	100	60	100	80	75	179211
2007-2008	41789	1	68	1.34	Yes		2007-2008	1	68	11	Male	Non-Hispanic Black		4th Grade														5415.34
2007-2008	41790	1	64	1.09	Yes		2007-2008	1	64	7	Male	Non-Hispanic White		2nd Grade
2007-2008	41791	1	67	2.56	Yes	Yes	2007-2008	1	67	78	Male	Non-Hispanic White	Married	9-11th Grade (Includes 12th grade with no diploma)		yes	70.5556	9	25	100	75	100	15	80	60	80	100	26153.3
2007-2008	41792	2	65		Yes		2007-2008	2	65	14	Male	Other Hispanic		7th Grade														10259.8
2007-2008	41793	1	65	1.18	Yes	No	2007-2008	1	65	43	Male	Non-Hispanic White	Never married	High School Grad/GED or Equivalent		no	71.1111	9	0	100	100	100	15	100	100	25	100	25827
2007-2008	41794	1	61	1.61	No	No	2007-2008	1	61	44	Male	Non-Hispanic White	Married	High School Grad/GED or Equivalent		no												29537.3
2007-2008	41795	1	66	0.32	No		2007-2008	1	66	7	Male	Mexican American		1st Grade														11376.6
2007-2008	41796	2	60	1.35	Yes	No	2007-2008	2	60	60	Female	Non-Hispanic Black	Widowed	High School Grad/GED or Equivalent		no	44.4444	8	100	0	100	20		40	10	80	50	14015.8
2007-2008	41797	1	60	2.08	Yes	Yes	2007-2008	1	60	69	Male	Non-Hispanic White	Married	High School Grad/GED or Equivalent		no	71.1111	9	50	100	75	70	70	20	100	55	100	48500.2
2007-2008	41798	1	74	3.23	Yes		2007-2008	1	74	16	Male	Non-Hispanic Black		10th Grade														6493.28
2007-2008	41799	1	73	2.18	Yes		2007-2008	1	73	6	Female	Mexican American		1st Grade														4279.4
2007-2008	41800	2	63	3.87	Yes		2007-2008	2	63	5	Male	Non-Hispanic White																116856
2007-2008	41801	1	72	3.63	Yes		2007-2008	1	72	18	Female	Non-Hispanic Black		More than high school		no												8452.78
2007-2008	41802	2	60	2.82	Yes	No	2007-2008	2	60	30	Female	Non-Hispanic White	Married	High School Grad/GED or Equivalent	no	no												45298.6
2007-2008	41803	1	72	1.02	Yes	Yes	2007-2008	1	72	74	Male	Non-Hispanic Black	Married	High School Grad/GED or Equivalent		no
2007-2008	41804	1	65	1.45	No		2007-2008	1	65	14	Female	Mexican American		8th Grade														5514.98
2007-2008	41805	2	63	1.23	Yes		2007-2008	2	63	9	Female	Non-Hispanic White		3rd Grade														26521.5
2007-2008	41806	2	67	5	Yes	Yes	2007-2008	2	67	61	Male	Non-Hispanic Black	Separated	Some College or AA degree		no												7573.55
2007-2008	41807	2	62	1.97	Yes		2007-2008	2	62	8	Male	Non-Hispanic White		2nd Grade														37598.1
2007-2008	41808	1	60	3.65	Yes	No	2007-2008	1	60	68	Female	Non-Hispanic White	Married	High School Grad/GED or Equivalent		no	76.6667	9	80	0	100	100	100	60	100	50	100	58237.7
2007-2008	41809	2	70	1.09	Yes	No	2007-2008	2	70	35	Male	Mexican American	Married	High School Grad/GED or Equivalent		no	35	9	0	0	0	70	0	60	60	50	75	19408.8
2007-2008	41810	2	69	2.02	Yes	No	2007-2008	2	69	80	Female	Other Race - Including Multi-Racial	Widowed	Less Than 9th Grade		no
2007-2008	41811	1	66	3.2	Yes	No	2007-2008	1	66	36	Female	Mexican American	Married	College Graduate or above	no	no												14022
2007-2008	41812	1	72	1.16	No		2007-2008	1	72	15	Male	Other Hispanic		8th Grade														21815.8
2007-2008	41813	2	68	0.47	No	No	2007-2008	2	68	28	Male	Mexican American	Living with partner	Less Than 9th Grade		no	95	9	80	100	100	100	100	100	100	100	75	24501.8
2007-2008	41814	2	60	1.44	Yes	No	2007-2008	2	60	80	Male	Non-Hispanic White	Widowed	9-11th Grade (Includes 12th grade with no diploma)		no												13903.9
2007-2008	41815	1	62	0.49	No		2007-2008	1	62	19	Male	Other Hispanic		11th Grade														27918.5
2007-2008	41816	1	66	0.66	Yes		2007-2008	1	66	5	Female	Mexican American																11499.2
2007-2008	41817	2	72	1.88	Yes		2007-2008	2	72	0	Male	Other Hispanic																4517.01
2007-2008	41818	1	70	3.49	Yes		2007-2008	1	70	16	Female	Mexican American		10th Grade														5842.42
2007-2008	41819	2	68	0.61	No	No	2007-2008	2	68	25	Male	Non-Hispanic Black	Never married	High School Grad/GED or Equivalent		no	71.6667	9	0	100	0	100	70	100	100	75	100	49624.9
2007-2008	41820	1	70	1.33	Yes	No	2007-2008	1	70	79	Female	Mexican American	Widowed	Less Than 9th Grade		no												5538.21
2007-2008	41821	1	66	1.11	No		2007-2008	1	66	16	Female	Mexican American		9th Grade														17184.7
2007-2008	41822	2	71	2.82	Yes	No	2007-2008	2	71	21	Male	Other Hispanic	Never married	Some College or AA degree		no	75.5556	9	25	80	100	100	15	60	100	100	100	15449.8
2007-2008	41823	1	74	1.21	Yes		2007-2008	1	74	19	Female	Non-Hispanic Black		More than high school														14466.6
2007-2008	41824	2	61	0.6	Yes		2007-2008	2	61	15	Female	Other Hispanic		8th Grade														6766.15
2007-2008	41825	1	63	2.06	Yes	No	2007-2008	1	63	63	Female	Non-Hispanic Black	Widowed	College Graduate or above		no												7110.55
2007-2008	41826	2	59	3.54	Yes		2007-2008	2	59	13	Male	Non-Hispanic White		6th Grade														34815.2
2007-2008	41827	1	63	4.38	Yes	Yes	2007-2008	1	63	78	Male	Non-Hispanic White	Married	College Graduate or above		no	53.8889	9	0	0	100	90	70	0	100	25	100	26666.7
2007-2008	41828	2	74		No		2007-2008	2	74	15	Female	Mexican American		7th Grade														22712.1
2007-2008	41829	1	61	3.11	Yes		2007-2008	1	61	7	Male	Non-Hispanic White		1st Grade														40582.9
2007-2008	41830	1	64	0.33	Yes		2007-2008	1	64	10	Male	Non-Hispanic Black		4th Grade														5417.9
2007-2008	41831	1	61	3.11	Yes		2007-2008	1	61	9	Female	Non-Hispanic White		4th Grade														42365
2007-2008	41832	2	60	4.46	Yes		2007-2008	2	60	7	Male	Non-Hispanic White		1st Grade		no												37406.7
2007-2008	41833	1	64	3.94	Yes		2007-2008	1	64	7	Female	Non-Hispanic Black		3rd Grade		no												4642.07
2007-2008	41834	1	70	5	Yes	No	2007-2008	1	70	43	Male	Non-Hispanic White	Married	College Graduate or above		no	80	9	50	100	0	100	70	100	100	100	100	46350.1
2007-2008	41835	1	62	3.38	Yes		2007-2008	1	62	7	Male	Other Race - Including Multi-Racial		1st Grade
2007-2008	41836	2	66	0.89	No		2007-2008	2	66	1	Female	Non-Hispanic White																9520.16
2007-2008	41837	2	70	5	Yes		2007-2008	2	70	15	Male	Non-Hispanic White		9th Grade														45871.2
2007-2008	41838	2	62	1.18	No	No	2007-2008	2	62	58	Female	Non-Hispanic White	Married	Less Than 9th Grade		no	56.6667	8	25	100	100	100	15	40		30	100	54826.9
2007-2008	41839	2	70	0.63	Yes	No	2007-2008	2	70	43	Female	Mexican American	Never married	9-11th Grade (Includes 12th grade with no diploma)	no	no	85.5556	9	50	80	100	70	70	100	100	100	100	11625
2007-2008	41840	2	63	1.2	Yes	No	2007-2008	2	63	75	Female	Non-Hispanic White	Married	9-11th Grade (Includes 12th grade with no diploma)		no	64.4444	9	25	100	100	100	30	80	40	30	75	46336.1
2007-2008	41841	1	61	4.38	Yes	No	2007-2008	1	61	70	Female	Non-Hispanic White	Married	College Graduate or above		yes												50551.3
2007-2008	41842	1	69	4.24	Yes	No	2007-2008	1	69	21	Male	Mexican American	Never married	Some College or AA degree		no	91.1111	9	50	100	100	100	70	100	100	100	100	66255
2007-2008	41843	1	69	1.03	No	No	2007-2008	1	69	25	Female	Mexican American	Married	9-11th Grade (Includes 12th grade with no diploma)	no	no	68.3333	9	0	0	100	100	15	100	100	100	100	11957.1
2007-2008	41844	2	60	1.14	Yes	No	2007-2008	2	60	36	Female	Non-Hispanic White	Never married	High School Grad/GED or Equivalent	no	no	42.7778	9	50	0	0	20	30	80	100	80	25	20074.8
2007-2008	41845	1	70	0	No		2007-2008	1	70	8	Male	Mexican American		2nd Grade
2007-2008	41846	2	64	0.97	Yes		2007-2008	2	64	14	Female	Non-Hispanic White		8th Grade														85668.4
2007-2008	41847	1	72	0.11	Yes		2007-2008	1	72	9	Female	Non-Hispanic Black		3rd Grade														6349.26
2007-2008	41848	2	63	2.14	Yes	Yes	2007-2008	2	63	76	Male	Non-Hispanic White	Married	Some College or AA degree		no												42359.9
2007-2008	41849	1	59	0.45	Yes		2007-2008	1	59	1	Male	Non-Hispanic Black																7026.68
2007-2008	41850	2	60	4.38	Yes		2007-2008	2	60	19	Male	Mexican American		More than high school														21691
2007-2008	41851	1	69	0.64	No		2007-2008	1	69	1	Male	Non-Hispanic White																7288.17
2007-2008	41852	2	59	1.79	Yes	No	2007-2008	2	59	65	Male	Non-Hispanic White	Married	High School Grad/GED or Equivalent		no	70	9	0	100	75	100	70	100	60	25	100	14932.5
2007-2008	41853	1	61		Yes	No	2007-2008	1	61	52	Male	Non-Hispanic White	Never married	Some College or AA degree		no	82.2222	9	25	100	100	100	100	40	100	75	100	169710
2007-2008	41854	1	61		Yes		2007-2008	1	61	8	Female	Non-Hispanic White		1st Grade														29721.1
2007-2008	41855	2	67	0.38	Yes	No	2007-2008	2	67	21	Male	Non-Hispanic White	Never married	Some College or AA degree		no	88.3333	9	50	100	100	70	100	100	100	75	100	26642.7
2007-2008	41856	2	64	3.32	Yes	No	2007-2008	2	64	69	Male	Non-Hispanic Black	Married	High School Grad/GED or Equivalent		no												11413
2007-2008	41857	2	62	4.84	Yes	No	2007-2008	2	62	30	Female	Non-Hispanic White	Married	Some College or AA degree	no	no	70.5556	9	25	100	0	40	70	100	100	100	100	131507
2007-2008	41858	2	60	0.19	Yes	Yes	2007-2008	2	60	60	Male	Non-Hispanic White	Never married	Some College or AA degree		yes	56.1111	8	0	100	0	70	100	60		100	75	57545
2007-2008	41859	2	61	5	Yes		2007-2008	2	61	7	Female	Non-Hispanic White		1st Grade														132448
2007-2008	41860	1	65	2.07	Yes		2007-2008	1	65	1	Male	Non-Hispanic Black
2007-2008	41861	1	64		Yes		2007-2008	1	64	17	Female	Non-Hispanic Black		High School Graduate														33744
2007-2008	41862	2	67	0.1	Yes		2007-2008	2	67	0	Female	Other Race - Including Multi-Racial																15838.9
2007-2008	41863	2	65	3.22	Yes	No	2007-2008	2	65	48	Female	Non-Hispanic Black	Divorced	High School Grad/GED or Equivalent		no	78.3333	9	80	0	75	100	70	80	100	100	100	32148.4
2007-2008	41864	2	71	2.95	Yes	No	2007-2008	2	71	44	Male	Mexican American	Divorced	Some College or AA degree		no	65	9	50	100	100	100	30	0	100	5	100	23403.9
2007-2008	41865	2	69	5	Yes	No	2007-2008	2	69	76	Male	Non-Hispanic Black	Married	College Graduate or above		no	60.5556	9	80	100	75	40	70	40	60	5	75	16264.3
2007-2008	41866	1	59	5	Yes		2007-2008	1	59	14	Female	Non-Hispanic White		7th Grade														98208.9
2007-2008	41867	2	59	1.94	No	No	2007-2008	2	59	35	Male	Non-Hispanic White	Married	9-11th Grade (Includes 12th grade with no diploma)		no	44.4444	9	0	0	100	20	15	100	40	50	75	11540.2
2007-2008	41868	2	60	1.61	Yes	No	2007-2008	2	60	78	Male	Non-Hispanic White	Married	Less Than 9th Grade		yes	62.2222	9	0	80	75	40	70	80	60	55	100	46874.8
2007-2008	41869	1	59	5	Yes	No	2007-2008	1	59	28	Male	Non-Hispanic White	Married	College Graduate or above		no	79.4444	9	50	100	100	100	30	60	100	75	100	173540
2007-2008	41870	1	71	0.91	Yes	No	2007-2008	1	71	59	Male	Mexican American	Divorced	9-11th Grade (Includes 12th grade with no diploma)		no	48.3333	8	80	0	75	40		100	40	0	100	32872
2007-2008	41871	2	62		Yes	No	2007-2008	2	62	65	Female	Non-Hispanic White	Married	Some College or AA degree		no	82.7778	9	25	100	100	40	100	100	100	80	100	53434.9
2007-2008	41872	2	63	2.02	Yes		2007-2008	2	63	3	Male	Non-Hispanic White																35607.1
2007-2008	41873	2	70	5	Yes	No	2007-2008	2	70	78	Female	Non-Hispanic White	Married	High School Grad/GED or Equivalent		no	56.1111	7	0	100	100	100	100			5	100	40593.5
2007-2008	41874	1	63	5	Yes		2007-2008	1	63	9	Female	Non-Hispanic White		3rd Grade														96709.3
2007-2008	41875	1	72	2.34	No	No	2007-2008	1	72	51	Female	Other Hispanic	Married	9-11th Grade (Includes 12th grade with no diploma)		no	58.3333	9	80	0	100	100	30	40	0	100	75	8722.27
2007-2008	41876	1	68	1.47	No	No	2007-2008	1	68	44	Male	Non-Hispanic Black	Divorced	9-11th Grade (Includes 12th grade with no diploma)		no
2007-2008	41877	1	59	2.19	No	No	2007-2008	1	59	42	Female	Non-Hispanic Black	Never married	Some College or AA degree	no	no	94.4444	9	50	100	100	100	100	100	100	100	100	23138.2
2007-2008	41878	2	60	1.19	Yes	Yes	2007-2008	2	60	46	Female	Non-Hispanic White	Separated	High School Grad/GED or Equivalent		no												20265.8
2007-2008	41879	1	60	1.31	Yes	Yes	2007-2008	1	60	80	Female	Non-Hispanic White	Married	Some College or AA degree		no	55	9	0	0	75	90	30	80	40	80	100	25419.2
2007-2008	41880	2	70	0.56	Yes		2007-2008	2	70	4	Male	Other Hispanic																6879.46
2007-2008	41881	2	60	5	Yes	Yes	2007-2008	2	60	70	Male	Non-Hispanic White	Married	High School Grad/GED or Equivalent		no	81.1111	9	50	100	75	100	70	80	100	55	100	30773.5
2007-2008	41882	2	71	1.58	Yes	No	2007-2008	2	71	59	Female	Mexican American	Never married	Less Than 9th Grade		no	56.6667	8	25	0	75	100	30	80		100	100	6828.57
2007-2008	41883	2	69	2.84	Yes	No	2007-2008	2	69	42	Female	Other Hispanic	Never married	Some College or AA degree	no	no												8014.84
2007-2008	41884	2	72	2.5	No		2007-2008	2	72	0	Female	Mexican American																9715.95
2007-2008	41885	1	65	4.12	Yes		2007-2008	1	65	0	Female	Mexican American																2236.74
2007-2008	41886	2	59	0.81	Yes		2007-2008	2	59	10	Male	Non-Hispanic White		3rd Grade														40873.6
2007-2008	41887	1	66	1.57	Yes		2007-2008	1	66	12	Male	Mexican American		6th Grade														32836.1
2007-2008	41888	1	66	1.18	Yes	No	2007-2008	1	66	71	Male	Non-Hispanic White	Living with partner	High School Grad/GED or Equivalent		yes	55.5556	9	25	100	0	100	70	40	60	30	75	55150.6
2007-2008	41889	2	66	1.56	No	No	2007-2008	2	66	32	Male	Mexican American	Divorced	High School Grad/GED or Equivalent		no	78.3333	9	25	100	100	70	100	60	100	50	100	67369.5
2007-2008	41890	2	59	0.48	Yes		2007-2008	2	59	10	Female	Other Race - Including Multi-Racial		3rd Grade														8969.8
2007-2008	41891	1	64	1.16	Yes		2007-2008	1	64	5	Male	Non-Hispanic Black																14112.9
2007-2008	41892	2	69		Yes		2007-2008	2	69	11	Female	Other Race - Including Multi-Racial		4th Grade														55949.3
2007-2008	41893	2	71		Yes		2007-2008	2	71	18	Male	Non-Hispanic Black		High School Graduate														25641.2
2007-2008	41894	1	70	0.87	Yes		2007-2008	1	70	1	Female	Mexican American																4437.37
2007-2008	41895	2	65	0.92	No	No	2007-2008	2	65	47	Female	Mexican American	Married	College Graduate or above		no	61.6667	9	0	0	25	70	100	100	60	100	100	15606
2007-2008	41896	2	59	0.48	Yes	Yes	2007-2008	2	59	53	Male	Non-Hispanic White	Married	High School Grad/GED or Equivalent		no	51.1111	8	0	90	0		100	20	100	75	75	19314.3
2007-2008	41897	2	66	1.65	Yes	Yes	2007-2008	2	66	77	Male	Non-Hispanic White	Married	College Graduate or above		no	73.3333	9	80	90	75	90	30	40	100	55	100	47256
2007-2008	41898	2	65	5	Yes	No	2007-2008	2	65	54	Female	Non-Hispanic Black	Divorced	College Graduate or above		no												30013.1
2007-2008	41899	1	71	0.71	No	No	2007-2008	1	71	35	Male	Mexican American	Married	Less Than 9th Grade		no	83.8889	9	50	100	100	100	70	60	100	75	100	19290.4
2007-2008	41900	1	64	0.47	Yes		2007-2008	1	64	1	Female	Non-Hispanic Black																7347.32
2007-2008	41901	2	68	1.43	Yes	No	2007-2008	2	68	68	Male	Non-Hispanic Black	Widowed	Less Than 9th Grade		no
2007-2008	41902	1	63	1.14	No	No	2007-2008	1	63	36	Male	Non-Hispanic Black	Married	High School Grad/GED or Equivalent		no												13187.7
2007-2008	41903	2	65	3.22	Yes	No	2007-2008	2	65	33	Male	Non-Hispanic Black	Living with partner	High School Grad/GED or Equivalent		no												19009.2
2007-2008	41904	2	62	3.71	Yes	Yes	2007-2008	2	62	70	Female	Non-Hispanic White	Married	High School Grad/GED or Equivalent		no	68.8889	9	80	100	75	100	15	80	40	30	100	38127.2
2007-2008	41905	2	63	3.77	Yes		2007-2008	2	63	5	Male	Non-Hispanic White																9020.84
2007-2008	41906	2	65	0.31	Yes		2007-2008	2	65	6	Male	Mexican American		Never Attended / Kindergarten Only														52784.2
2007-2008	41907	2	61	0.66	Yes	No	2007-2008	2	61	23	Female	Other Hispanic	Living with partner	9-11th Grade (Includes 12th grade with no diploma)	no	no
2007-2008	41908	1	66	2.56	Yes	No	2007-2008	1	66	55	Female	Mexican American	Married	Less Than 9th Grade		no	66.6667	9	80	40	100	100	30	60	40	50	100	18432.2
2007-2008	41909	1	59	0.8	Yes	Yes	2007-2008	1	59	69	Male	Mexican American	Married	Less Than 9th Grade		no												4423.18
2007-2008	41910	1	70	1.09	Yes		2007-2008	1	70	16	Male	Mexican American		10th Grade														4127.05
2007-2008	41911	2	68	1.35	Yes		2007-2008	2	68	19	Female	Other Hispanic		More than high school														6322.05
2007-2008	41912	2	65	4.13	Yes	No	2007-2008	2	65	56	Female	Non-Hispanic Black	Divorced	College Graduate or above		no	45.5556	9	25	0	100	40	0	60	60	50	75	20118
2007-2008	41913	2	70	5	Yes		2007-2008	2	70	18	Male	Other Hispanic		High School Graduate
2007-2008	41914	2	59	0.52	Yes	No	2007-2008	2	59	25	Male	Non-Hispanic White	Married	9-11th Grade (Includes 12th grade with no diploma)		no												25830.9
2007-2008	41915	2	62	3.93	Yes	No	2007-2008	2	62	63	Female	Non-Hispanic White	Married	College Graduate or above		no	69.4444	9	50	0	75	70	70	60	100	100	100	75680.4
2007-2008	41916	2	63	1.18	Yes		2007-2008	2	63	5	Male	Non-Hispanic White																23367.3
2007-2008	41917	2	61	1.81	Yes		2007-2008	2	61	9	Male	Other Hispanic		3rd Grade		no												30347.2
2007-2008	41918	1	67	0.9	No	No	2007-2008	1	67	53	Female	Non-Hispanic White	Married	9-11th Grade (Includes 12th grade with no diploma)		no												18165
2007-2008	41919	1	66	4.09	Yes	No	2007-2008	1	66	53	Female	Mexican American	Married	Some College or AA degree		no	83.8889	9	80	0	100	100	100	100	100	75	100	28356.8
2007-2008	41920	1	69	0.7	Yes		2007-2008	1	69	6	Female	Non-Hispanic White		Never Attended / Kindergarten Only														16829.4
2007-2008	41921	1	73	0	No	No	2007-2008	1	73	60	Male	Other Hispanic	Separated	Less Than 9th Grade		no	75	9	80	100	100	100	70	0	100	25	100	9272.46
2007-2008	41922	2	63	5	Yes	No	2007-2008	2	63	33	Female	Non-Hispanic White	Married	College Graduate or above	no	no	94.4444	9	50	100	100	100	100	100	100	100	100	43485.3
2007-2008	41923	1	63	3.92	Yes		2007-2008	1	63	60	Female	Non-Hispanic White	Divorced	College Graduate or above		no	84.4444	9	50	100	100	100	70	60	100	80	100	51794.4
2007-2008	41924	2	68	2.45	No	No	2007-2008	2	68	35	Male	Non-Hispanic Black		Some College or AA degree		no	64.4444	7	80	100	0	100	100			100	100	12807.4
2007-2008	41925	1	69	5	Yes		2007-2008	1	69	17	Male	Non-Hispanic White		11th Grade														37118.4
2007-2008	41926	1	70	5	Yes	No	2007-2008	1	70	49	Male	Non-Hispanic White	Divorced	High School Grad/GED or Equivalent		no												72282.1
2007-2008	41927	2	62	3.57	No	No	2007-2008	2	62	38	Male	Non-Hispanic White	Married	Some College or AA degree		no	88.3333	9	50	100	100	70	100	100	100	100	75	65570.4
2007-2008	41928	2	64		Yes		2007-2008	2	64	2	Female	Non-Hispanic Black																7216.48
2007-2008	41929	2	68	5	No	No	2007-2008	2	68	44	Female	Non-Hispanic Black	Divorced	Some College or AA degree	no	no	62.7778	9	25	100	0	100	0	100	60	80	100	57052.1
2007-2008	41930	2	71	1.48	Yes		2007-2008	2	71	12	Male	Mexican American		6th Grade		no
2007-2008	41931	1	67	1.1	Yes		2007-2008	1	67	15	Male	Non-Hispanic White		9th Grade														50973.4
2007-2008	41932	1	65	1.45	No		2007-2008	1	65	0	Female	Mexican American																6519.65
2007-2008	41933	2	72		No	No	2007-2008	2	72	50	Female	Mexican American	Married	Some College or AA degree		no
2007-2008	41934	1	61	0.88	No	No	2007-2008	1	61	41	Male	Non-Hispanic Black	Never married	Some College or AA degree		no												19919.1
2007-2008	41935	2	60	2.83	Yes		2007-2008	2	60	9	Female	Non-Hispanic White		3rd Grade														47330.1
2007-2008	41936	2	74		No		2007-2008	2	74	16	Male	Mexican American		11th Grade														21893.9
2007-2008	41937	2	73	1.99	Yes		2007-2008	2	73	0	Female	Non-Hispanic White																35047.2
2007-2008	41938	1	70	5	Yes		2007-2008	1	70	11	Male	Other Race - Including Multi-Racial		5th Grade														5649.74
2007-2008	41939	1	64	4.36	Yes		2007-2008	1	64	2	Female	Non-Hispanic Black																6871.23
2007-2008	41940	2	62	2.42	Yes		2007-2008	2	62	10	Female	Other Hispanic		3rd Grade		no												4101.98
2007-2008	41941	1	70	4.6	Yes		2007-2008	1	70	13	Male	Mexican American		7th Grade														18256.2
2007-2008	41942	2	63	3.77	Yes	No	2007-2008	2	63	44	Female	Non-Hispanic White	Married	Some College or AA degree	no	no	73.3333	9	0	100	0	100	100	60	100	100	100	51232.4
2007-2008	41943	2	65	3.23	Yes		2007-2008	2	65	8	Male	Non-Hispanic White		2nd Grade														33648.7
2007-2008	41944	1	67	0	No	No	2007-2008	1	67	39	Female	Non-Hispanic White	Living with partner	9-11th Grade (Includes 12th grade with no diploma)	no	no	67.7778	9	0	100	0	100	70	40	100	100	100	121880
2007-2008	41945	2	64		Yes		2007-2008	2	64	1	Male	Non-Hispanic Black																6969.06
2007-2008	41946	2	64	1.83	Yes	No	2007-2008	2	64	65	Female	Non-Hispanic Black	Widowed	High School Grad/GED or Equivalent		no	63.3333	9	25	100	75	40	30	60	60	80	100	7557.97
2007-2008	41947	1	61	0.73	Yes	No	2007-2008	1	61	31	Male	Non-Hispanic White	Divorced	High School Grad/GED or Equivalent		yes	62.7778	9	25	100	0	20	70	100	100	50	100	13432.4
2007-2008	41948	2	62	0.62	Yes	No	2007-2008	2	62	27	Male	Non-Hispanic White	Never married	High School Grad/GED or Equivalent		no
2007-2008	41949	2	66	2.26	Yes		2007-2008	2	66	18	Female	Mexican American		12th Grade, No Diploma														4196.02
2007-2008	41950	1	61	0.93	Yes		2007-2008	1	61	5	Female	Non-Hispanic White																9924.4
2007-2008	41951	1	66		No		2007-2008	1	66	19	Male	Mexican American		High School Graduate														7886.52
2007-2008	41952	1	70	5	Yes	Yes	2007-2008	1	70	71	Female	Non-Hispanic White	Married	College Graduate or above		no	59.4444	8	0	80	75	90	30	60	100		100	21247.1
2007-2008	41953	2	65	5	Yes	No	2007-2008	2	65	80	Female	Non-Hispanic White	Married	Some College or AA degree		no												41084.7
2007-2008	41954	1	64	5	Yes		2007-2008	1	64	9	Male	Non-Hispanic Black		4th Grade														59822.2
2007-2008	41955	2	70	1.41	No		2007-2008	2	70	17	Male	Mexican American		11th Grade														27351.9
2007-2008	41956	1	65	5	Yes		2007-2008	1	65	1	Female	Non-Hispanic Black																6154.05
2007-2008	41957	2	65	1.79	Yes		2007-2008	2	65	7	Male	Other Hispanic		1st Grade														9742.31
2007-2008	41958	1	64		No	No	2007-2008	1	64	26	Male	Mexican American	Never married	High School Grad/GED or Equivalent		no	80.5556	9	0	100	80	70	100	100	100	100	75	12917
2007-2008	41959	1	73	1.46	Yes		2007-2008	1	73	16	Male	Non-Hispanic Black		10th Grade														6190.64
2007-2008	41960	2	62	5	Yes	No	2007-2008	2	62	80	Female	Non-Hispanic White	Widowed	High School Grad/GED or Equivalent		no	68.8889	9	25	100	100	100	70	60	60	5	100	44628.7
2007-2008	41961	2	66	4.72	Yes	No	2007-2008	2	66	46	Male	Non-Hispanic White	Married	High School Grad/GED or Equivalent		no	65	9	25	100	100	70	30	80	30	50	100	69661.4
2007-2008	41962	1	63	5	Yes	No	2007-2008	1	63	48	Male	Non-Hispanic White	Married	High School Grad/GED or Equivalent		no	78.8889	9	25	100	100	100	70	60	100	55	100	53646
2007-2008	41963	1	66	0.06	Yes	No	2007-2008	1	66	66	Male	Mexican American	Married	9-11th Grade (Includes 12th grade with no diploma)		no												12906.3
2007-2008	41964	1	69	1.96	Yes	No	2007-2008	1	69	42	Male	Non-Hispanic White	Separated	Some College or AA degree		no	51.6667	9	0	0	55	100	15	20	100	75	100	21863.8
2007-2008	41965	1	70	2.17	Yes	No	2007-2008	1	70	37	Female	Other Race - Including Multi-Racial	Married	High School Grad/GED or Equivalent	yes	no												32812.1
2007-2008	41966	2	69	2.05	Yes	No	2007-2008	2	69	62	Male	Other Race - Including Multi-Racial	Married	High School Grad/GED or Equivalent		no												59798
2007-2008	41967	2	70	1.27	Yes		2007-2008	2	70	2	Male	Non-Hispanic White
2007-2008	41968	2	59	0.77	No	No	2007-2008	2	59	26	Male	Non-Hispanic White	Living with partner	9-11th Grade (Includes 12th grade with no diploma)		yes	61.6667	9	0	100	0	40	100	40	100	75	100	21999.4
2007-2008	41969	2	62	2.71	Yes	No	2007-2008	2	62	61	Female	Non-Hispanic White	Married	High School Grad/GED or Equivalent		no	66.6667	9	50	0	100	100	30	40	100	80	100	67996.8
2007-2008	41970	2	61		Yes		2007-2008	2	61	0	Male	Other Hispanic																3143.62
2007-2008	41971	1	67	0.88	Yes	No	2007-2008	1	67	66	Male	Non-Hispanic Black	Married	High School Grad/GED or Equivalent		no	66.6667	8	80	90	0	70	100	80		80	100	5939.25
2007-2008	41972	2	63	1.18	Yes	No	2007-2008	2	63	26	Female	Non-Hispanic White	Living with partner	Some College or AA degree	no	no
2007-2008	41973	1	60	2.35	Yes	No	2007-2008	1	60	71	Male	Non-Hispanic White	Divorced	Some College or AA degree		no	53.3333	9	50	0	0	100	30	80	40	80	100	28178.8
2007-2008	41974	2	70	1.65	Yes		2007-2008	2	70	7	Male	Mexican American		1st Grade														6841.8
2007-2008	41975	2	64	1.4	Yes		2007-2008	2	64	2	Female	Non-Hispanic White																6960.42
2007-2008	41976	2	67	1.77	Yes		2007-2008	2	67	0	Female	Mexican American																4410.6
2007-2008	41977	1	68	0.83	Yes		2007-2008	1	68	11	Male	Non-Hispanic Black		4th Grade		no
2007-2008	41978	2	72	1.18	Yes		2007-2008	2	72	1	Female	Non-Hispanic White																7533.18
2007-2008	41979	1	71	0.71	Yes		2007-2008	1	71	6	Male	Mexican American		Never Attended / Kindergarten Only														6969.65
2007-2008	41980	2	63	2.97	Yes		2007-2008	2	63	8	Female	Non-Hispanic White		2nd Grade
2007-2008	41981	1	65	5	Yes	No	2007-2008	1	65	55	Female	Mexican American	Divorced	College Graduate or above		no												6128.55
2007-2008	41982	2	62		Yes	No	2007-2008	2	62	34	Female	Non-Hispanic White	Married	High School Grad/GED or Equivalent	no	no	58.8889	7	50	100	100	100	30			100	50	119222
2007-2008	41983	1	59	1.02	Yes	No	2007-2008	1	59	71	Female	Non-Hispanic White	Married	High School Grad/GED or Equivalent		no												19972.8
2007-2008	41984	1	72	0.8	Yes	No	2007-2008	1	72	78	Female	Other Hispanic	Never married	Some College or AA degree		no												13050.6
2007-2008	41985	2	70	0.63	Yes		2007-2008	2	70	16	Male	Mexican American		10th Grade														7146.48
2007-2008	41986	2	59	1.26	Yes		2007-2008	2	59	5	Male	Non-Hispanic White																11395.2
2007-2008	41987	1	66	1.36	Yes		2007-2008	1	66	9	Male	Mexican American		3rd Grade
2007-2008	41988	2	64	0.97	Yes	No	2007-2008	2	64	52	Female	Non-Hispanic White	Married	9-11th Grade (Includes 12th grade with no diploma)		no	65	9	0	100	0	70	100	40	100	75	100	50429.2
2007-2008	41989	1	68	0.87	Yes		2007-2008	1	68	13	Male	Non-Hispanic Black		7th Grade														31829.5
2007-2008	41990	2	65	1.99	No	No	2007-2008	2	65	45	Male	Mexican American	Never married	Less Than 9th Grade		no	66.1111	9	80	100	50	100	15	40	60	50	100	16735.5
2007-2008	41991	2	66	0.35	No	No	2007-2008	2	66	66	Male	Mexican American	Married	Less Than 9th Grade		no	47.2222	8	0	100	25	40	70	40		50	100	13826.7
2007-2008	41992	1	69	2.66	Yes		2007-2008	1	69	2	Female	Mexican American																14112.1
2007-2008	41993	2	62	5	Yes	No	2007-2008	2	62	59	Female	Non-Hispanic White	Married	College Graduate or above		yes												158176
2007-2008	41994	2	61	4.26	Yes		2007-2008	2	61	17	Male	Non-Hispanic White		11th Grade														38791.1
2007-2008	41995	2	62	1.41	Yes		2007-2008	2	62	5	Female	Non-Hispanic White																12484.5
2007-2008	41996	2	67	3.3	Yes		2007-2008	2	67	2	Male	Other Race - Including Multi-Racial																78155.9
2007-2008	41997	2	66	1.81	No		2007-2008	2	66	12	Male	Mexican American		5th Grade														8991.64
2007-2008	41998	1	63	1.24	No	No	2007-2008	1	63	20	Male	Non-Hispanic Black	Never married	High School Grad/GED or Equivalent		no												15706.5
2007-2008	41999	2	60	1.42	Yes		2007-2008	2	60	3	Male	Non-Hispanic White																10776.2
2007-2008	42000	1	68	5	Yes	No	2007-2008	1	68	51	Male	Non-Hispanic White	Married	College Graduate or above		no	82.2222	9	50	100	75	100	100	40	100	75	100	60223.2
2007-2008	42001	2	62	3.69	Yes	No	2007-2008	2	62	22	Male	Non-Hispanic White	Never married	High School Grad/GED or Equivalent		no												52619.4
2007-2008	42002	1	63	5	Yes	No	2007-2008	1	63	52	Male	Non-Hispanic Black	Divorced	College Graduate or above		no	57.7778	9	25	100	100	40	30	20	100	30	75	11627
2007-2008	42003	1	66	0.33	Yes	No	2007-2008	1	66	68	Male	Mexican American	Widowed	Less Than 9th Grade		no												15094.6
2007-2008	42004	1	71	5	Yes	No	2007-2008	1	71	52	Male	Mexican American	Married	High School Grad/GED or Equivalent		no	67.2222	9	25	100	100	100	30	20	100	30	100	9217.23
2007-2008	42005	1	67	4.9	Yes	Yes	2007-2008	1	67	80	Male	Non-Hispanic White	Widowed	Some College or AA degree		no	53.3333	9	0	0	0	90	70	80	60	80	100	26605.6
2007-2008	42006	2	70	1.41	Yes		2007-2008	2	70	9	Male	Mexican American		3rd Grade														31679.7
2007-2008	42007	2	61	0.65	Yes		2007-2008	2	61	2	Male	Non-Hispanic White																14127.8
2007-2008	42008	2	68	1.56	Yes		2007-2008	2	68	1	Male	Non-Hispanic Black																8897.97
2007-2008	42009	2	59	0.57	Yes	No	2007-2008	2	59	38	Female	Non-Hispanic White	Divorced	High School Grad/GED or Equivalent	no	no	69.4444	9	25	100	75	70	30	100	100	25	100	18116.4
2007-2008	42010	2	64	1.43	Yes	No	2007-2008	2	64	24	Male	Mexican American	Never married	9-11th Grade (Includes 12th grade with no diploma)		no
2007-2008	42011	1	59	0.44	Yes		2007-2008	1	59	12	Male	Non-Hispanic Black		4th Grade														9378.8
2007-2008	42012	2	68	3.41	No		2007-2008	2	68	11	Female	Other Race - Including Multi-Racial		4th Grade
2007-2008	42013	1	73	4.71	No		2007-2008	1	73	0	Female	Mexican American																6743.63
2007-2008	42014	1	68	1.46	Yes	No	2007-2008	1	68	50	Male	Non-Hispanic White	Never married	Some College or AA degree		no
2007-2008	42015	2	60	3.75	Yes	No	2007-2008	2	60	79	Female	Non-Hispanic White	Married	Some College or AA degree		no	82.7778	9	50	100	100	100	100	80	60	55	100	24291.3
2007-2008	42016	1	73	2.64	No	No	2007-2008	1	73	24	Male	Non-Hispanic White	Living with partner	College Graduate or above		no	84.4444	9	50	100	100	100	70	40	100	100	100	79389.4
2007-2008	42017	1	67	0.58	Yes		2007-2008	1	67	5	Female	Other Race - Including Multi-Racial
2007-2008	42018	1	70	1.01	No	No	2007-2008	1	70	62	Male	Mexican American	Living with partner	Less Than 9th Grade		no												5839.22
2007-2008	42019	1	61	1.41	Yes		2007-2008	1	61	4	Male	Non-Hispanic White																28710.4
2007-2008	42020	2	60	1.13	Yes		2007-2008	2	60	3	Female	Non-Hispanic White																9728.26
2007-2008	42021	1	73	1.74	Yes	No	2007-2008	1	73	44	Male	Mexican American	Married	Less Than 9th Grade		no	81.1111	9	80	100	55	70	70	100	100	55	100	29698.9
2007-2008	42022	2	62	0.36	No		2007-2008	2	62	14	Female	Other Hispanic		7th Grade		no												6913.25
2007-2008	42023	1	71	0.3	Yes	No	2007-2008	1	71	30	Female	Mexican American	Separated	9-11th Grade (Includes 12th grade with no diploma)	no	no	74.4444	9	50	100	0	70	100	100	100	50	100	47099.6
2007-2008	42024	1	61	3.15	Yes	No	2007-2008	1	61	36	Male	Non-Hispanic White	Married	9-11th Grade (Includes 12th grade with no diploma)		no	76.1111	9	0	100	75	100	100	60	100	50	100	44988.8
2007-2008	42025	1	64	1.93	Yes	No	2007-2008	1	64	43	Female	Non-Hispanic Black	Never married	High School Grad/GED or Equivalent	no	no												22904.7
2007-2008	42026	1	62	4.37	Yes	No	2007-2008	1	62	71	Male	Non-Hispanic White	Married	Less Than 9th Grade		no	72.7778	9	80	100	100	100	15	60	100	0	100	31059.9
2007-2008	42027	1	70	2.25	No		2007-2008	1	70	9	Female	Mexican American		3rd Grade														3883.57
2007-2008	42028	2	72	3.38	Yes	No	2007-2008	2	72	45	Male	Non-Hispanic Black	Never married	High School Grad/GED or Equivalent		no	88.8889	9	80	100	100	40	100	100	100	80	100	16801.1
2007-2008	42029	2	62	1.25	Yes	No	2007-2008	2	62	71	Female	Non-Hispanic White	Widowed	9-11th Grade (Includes 12th grade with no diploma)		no	59.4444	9	25	100	100	100	70	0	60	30	50	29733.7
2007-2008	42030	1	67	5	Yes	No	2007-2008	1	67	33	Female	Non-Hispanic White	Married	Some College or AA degree	no	no												42313.9
2007-2008	42031	2	66	1.76	No		2007-2008	2	66	6	Male	Non-Hispanic White		Never Attended / Kindergarten Only														14554.5
2007-2008	42032	1	60	2.57	Yes		2007-2008	1	60	2	Female	Non-Hispanic White																19402.8
2007-2008	42033	2	68	0.1	Yes	No	2007-2008	2	68	63	Male	Non-Hispanic Black	Widowed	Less Than 9th Grade		no	49.4444	7	50	0	100	100	15			80	100	6549.06
2007-2008	42034	1	62		No	No	2007-2008	1	62	29	Male	Other Race - Including Multi-Racial	Married	9-11th Grade (Includes 12th grade with no diploma)		no												20289.8
2007-2008	42035	2	61	1.13	Yes	No	2007-2008	2	61	51	Male	Other Hispanic	Married	College Graduate or above		no	63.8889	8	50	100	100	70	30	100		25	100	9590.61
2007-2008	42036	2	65	1.79	Yes		2007-2008	2	65	5	Male	Other Hispanic																10643.1
2007-2008	42037	1	61		Yes	Yes	2007-2008	1	61	75	Male	Non-Hispanic White	Never married	College Graduate or above		no	53.3333	8	25	0	100	100		60	40	80	75	42634.9
2007-2008	42038	2	62	5	Yes		2007-2008	2	62	6	Male	Other Race - Including Multi-Racial		Never Attended / Kindergarten Only														19064.6
2007-2008	42039	2	63		Yes		2007-2008	2	63	0	Male	Non-Hispanic White																13658.1
2007-2008	42040	2	61	3.42	No		2007-2008	2	61	19	Male	Other Hispanic		High School Graduate														17320.8
2007-2008	42041	2	70	1.31	Yes	No	2007-2008	2	70	80	Male	Non-Hispanic White	Married	Less Than 9th Grade		no	78.8889	9	80	0	100	100	100	100	100	30	100	11254.8
2007-2008	42042	2	62	1.7	Yes	No	2007-2008	2	62	76	Male	Other Hispanic	Widowed	Less Than 9th Grade		no												11650.3
2007-2008	42043	2	61	0.96	Yes		2007-2008	2	61	38	Male	Mexican American	Married	9-11th Grade (Includes 12th grade with no diploma)			67.7778	8	80	100		100	30	40	60	100	100	21517.8
2007-2008	42044	1	62	1.45	Yes		2007-2008	1	62	13	Female	Other Hispanic		6th Grade														20116
2007-2008	42045	1	69	5	Yes	No	2007-2008	1	69	53	Male	Non-Hispanic White	Divorced	Some College or AA degree		no												190494
2007-2008	42046	2	61	2.62	Yes		2007-2008	2	61	1	Male	Mexican American
2007-2008	42047	2	62	3.69	Yes	No	2007-2008	2	62	52	Female	Non-Hispanic White	Married	High School Grad/GED or Equivalent		no	72.7778	9	80	90	80	100	15	60	100	80	50	68736.7
2007-2008	42048	1	62	0.98	No	No	2007-2008	1	62	50	Male	Other Race - Including Multi-Racial	Married	High School Grad/GED or Equivalent		no
2007-2008	42049	2	64	5	Yes	No	2007-2008	2	64	44	Male	Non-Hispanic White	Married	Some College or AA degree		no	65	9	25	0	100	100	70	40	100	50	100	160628
2007-2008	42050	1	71	5	Yes	No	2007-2008	1	71	52	Male	Non-Hispanic White	Divorced	College Graduate or above		no	82.2222	9	100	100	100	100	70	40	30	100	100	101290
2007-2008	42051	1	61	1.99	Yes		2007-2008	1	61	16	Female	Non-Hispanic Black		9th Grade														29328
2007-2008	42052	1	70	0.39	Yes	No	2007-2008	1	70	33	Female	Mexican American	Separated	High School Grad/GED or Equivalent	no	no												8534.36
2007-2008	42053	2	65	5	Yes	No	2007-2008	2	65	38	Female	Mexican American	Married	College Graduate or above	no	no	91.6667	9	25	100	100	100	100	100	100	100	100	16947.7
2007-2008	42054	2	62	0.18	Yes		2007-2008	2	62	6	Female	Non-Hispanic Black		Never Attended / Kindergarten Only														4670.74
2007-2008	42055	1	71	0.18	Yes	No	2007-2008	1	71	27	Female	Mexican American	Living with partner	Less Than 9th Grade	no	no	50.5556	9	25	100	0	20	0	60	100	100	50	50146.5
2007-2008	42056	2	64	1.29	Yes	No	2007-2008	2	64	57	Female	Non-Hispanic White	Married	Some College or AA degree		no	65	9	25	60	75	100	30	20	100	75	100	26396.7
2007-2008	42057	1	61	0.58	Yes	No	2007-2008	1	61	37	Male	Non-Hispanic White	Married	High School Grad/GED or Equivalent		no	39.4444	9	0	60	0	40	0	20	60	100	75	22406.4
2007-2008	42058	2	59	0.74	No	No	2007-2008	2	59	33	Female	Non-Hispanic White	Never married	Some College or AA degree	no	no	73.3333	9	50	100	75	100	0	100	60	75	100	20588
2007-2008	42059	1	69	5	Yes	No	2007-2008	1	69	46	Male	Non-Hispanic White	Married	Some College or AA degree		no	68.3333	9	25	100	100	70	100	20	100	25	75	111766
2007-2008	42060	2	60	1.13	Yes		2007-2008	2	60	1	Male	Non-Hispanic White																5495.13
2007-2008	42061	2	69	0.41	No	No	2007-2008	2	69	23	Female	Mexican American	Divorced	9-11th Grade (Includes 12th grade with no diploma)	no	no	58.8889	9	25	100	0	100	15	40	100	100	50	7327.63
2007-2008	42062	1	61	5	Yes	No	2007-2008	1	61	30	Male	Non-Hispanic White	Married	High School Grad/GED or Equivalent		no	67.7778	9	25	100	0	70	100	40	100	75	100	148688
2007-2008	42063	1	70	1.45	Yes		2007-2008	1	70	2	Male	Mexican American																3254.08
2007-2008	42064	2	67	1.71	Yes	No	2007-2008	2	67	48	Female	Non-Hispanic Black	Never married	Some College or AA degree		no	66.6667	9	0	90	100	70	30	80	100	30	100	24764.9
2007-2008	42065	1	66	5	Yes	No	2007-2008	1	66	59	Female	Mexican American	Married	High School Grad/GED or Equivalent		no												28356.8
2007-2008	42066	1	74	0.99	Yes	No	2007-2008	1	74	38	Female	Non-Hispanic White	Married	Some College or AA degree	no	no	77.7778	9	80	100	0	100	70	100	100	50	100	19241.6
2007-2008	42067	2	60	1	Yes	No	2007-2008	2	60	63	Male	Non-Hispanic White	Married	Some College or AA degree		no												32957.4
2007-2008	42068	1	69	2.97	Yes		2007-2008	1	69	16	Male	Non-Hispanic Black		9th Grade														8133.96
2007-2008	42069	1	59	0.91	Yes	No	2007-2008	1	59	36	Female	Non-Hispanic White	Married	Some College or AA degree	no	no	72.7778	9	80	0	0	100	100	100	100	100	75	17742.1
2007-2008	42070	1	70	1.16	Yes		2007-2008	1	70	7	Male	Mexican American		1st Grade
2007-2008	42071	1	67	1.99	Yes	No	2007-2008	1	67	44	Female	Non-Hispanic White	Married	High School Grad/GED or Equivalent	no	no	58.3333	9	25	100	0	70	70	80	100	80	0	54528.8
2007-2008	42072	2	70	0.4	No		2007-2008	2	70	19	Male	Non-Hispanic Black		12th Grade, No Diploma														18154.9
2007-2008	42073	2	71	1.93	Yes	No	2007-2008	2	71	42	Male	Mexican American	Living with partner	9-11th Grade (Includes 12th grade with no diploma)		no	80	9	50	60	100	100	70	40	100	100	100	40072.3
2007-2008	42074	1	60		Yes	Yes	2007-2008	1	60	77	Male	Non-Hispanic White	Married	College Graduate or above		no	82.7778	9	80	100	75	100	70	100	40	80	100	28617.5
2007-2008	42075	2	63	3.77	Yes	No	2007-2008	2	63	46	Male	Non-Hispanic White	Married	High School Grad/GED or Equivalent		yes	40.5556	8	50	0	0	100	30	80		30	75	61597.4
2007-2008	42076	1	66	1.1	No		2007-2008	1	66	6	Female	Mexican American		Never Attended / Kindergarten Only														5876.26
2007-2008	42077	1	59	5	Yes	No	2007-2008	1	59	49	Male	Non-Hispanic White	Never married	High School Grad/GED or Equivalent		no	61.1111	9	0	100	0	100	70	20	60	100	100	18009.1
2007-2008	42078	1	74	0.53	Yes		2007-2008	1	74	11	Female	Non-Hispanic Black		5th Grade														4576.53
2007-2008	42079	1	65	3.65	Yes	No	2007-2008	1	65	80	Male	Non-Hispanic White	Married	College Graduate or above		yes	89.4444	9	50	100	75	100	100	100	100	80	100	18631
2007-2008	42080	1	61	0.87	Yes		2007-2008	1	61	16	Male	Non-Hispanic White		9th Grade
2007-2008	42081	2	71	2.27	No	No	2007-2008	2	71	39	Male	Non-Hispanic White	Never married	Some College or AA degree		no	52.7778	7	0	100	0	100	100			75	100	153287
2007-2008	42082	2	68	0.67	Yes	No	2007-2008	2	68	33	Male	Non-Hispanic Black	Living with partner	Some College or AA degree		no												51332.1
2007-2008	42083	1	68	1.47	No	No	2007-2008	1	68	34	Male	Non-Hispanic Black	Separated	High School Grad/GED or Equivalent		no	66.6667	9	25	20	25	100	30	100	100	100	100	21257.6
2007-2008	42084	1	61	0.51	Yes		2007-2008	1	61	1	Female	Non-Hispanic Black																7256.78
2007-2008	42085	2	71	0.43	No	No	2007-2008	2	71	57	Female	Non-Hispanic White	Divorced	9-11th Grade (Includes 12th grade with no diploma)		no	65	9	0	100	0	70	100	40	100	100	75	22001.6
2007-2008	42086	2	69	4.25	Yes		2007-2008	2	69	0	Female	Other Race - Including Multi-Racial																11284.7
2007-2008	42087	2	67	3.37	Yes	No	2007-2008	2	67	32	Female	Non-Hispanic Black	Never married	College Graduate or above	no	no	81.1111	9	50	100	100	100	0	100	100	80	100	16377.3
2007-2008	42088	1	64	0.87	Yes		2007-2008	1	64	0	Female	Mexican American																2972.99
2007-2008	42089	2	60	4.01	Yes		2007-2008	2	60	10	Male	Non-Hispanic White		4th Grade		no												111214
2007-2008	42090	1	67	0.83	Yes		2007-2008	1	67	0	Female	Non-Hispanic White																7450.53
2007-2008	42091	2	62	3.18	Yes	No	2007-2008	2	62	22	Male	Non-Hispanic White	Married	High School Grad/GED or Equivalent		no	82.7778	9	0	100	100	70	100	100	100	75	100	133955
2007-2008	42092	2	72	0.64	No		2007-2008	2	72	1	Male	Non-Hispanic Black																6065.72
2007-2008	42093	2	65	5	Yes		2007-2008	2	65	4	Male	Non-Hispanic White																90727.6
2007-2008	42094	1	65	0.77	Yes	No	2007-2008	1	65	55	Female	Non-Hispanic Black	Divorced	9-11th Grade (Includes 12th grade with no diploma)		no	57.7778	8	0	100	100		30	60	100	30	100	29378.5
2007-2008	42095	1	71	1.29	Yes		2007-2008	1	71	3	Female	Other Hispanic																7881.29
2007-2008	42096	2	67	3.3	Yes	No	2007-2008	2	67	35	Male	Other Race - Including Multi-Racial	Married	College Graduate or above		no	77.7778	9	50	100	100	100	70	20	60	100	100	127079
2007-2008	42097	1	70	1.14	No		2007-2008	1	70	13	Male	Mexican American		5th Grade														4791.67
2007-2008	42098	2	68	2.18	Yes		2007-2008	2	68	13	Male	Non-Hispanic Black		6th Grade		no												6640.71
2007-2008	42099	1	67	4.38	Yes	No	2007-2008	1	67	66	Male	Non-Hispanic White	Married	College Graduate or above		no	70	9	50	100	75	70	15	80	60	80	100	37037.1
2007-2008	42100	1	62	1.93	Yes	No	2007-2008	1	62	32	Male	Other Hispanic	Never married	Less Than 9th Grade		no
2007-2008	42101	2	73	4.14	Yes		2007-2008	2	73	15	Male	Other Race - Including Multi-Racial		8th Grade														28250.3
2007-2008	42102	2	67	2.43	No	No	2007-2008	2	67	58	Female	Non-Hispanic Black	Married	9-11th Grade (Includes 12th grade with no diploma)		no	38.8889	7	0	0	100	70	30			50	100	14854.6
2007-2008	42103	1	63	3.07	Yes	No	2007-2008	1	63	67	Female	Non-Hispanic Black	Married	High School Grad/GED or Equivalent		no	76.6667	9	50	90	75	100	70	100	100	5	100	7079.92
2007-2008	42104	2	69	2.14	Yes	No	2007-2008	2	69	71	Female	Non-Hispanic White	Widowed	Some College or AA degree		no	82.2222	9	50	80	100	100	70	40	100	100	100	37614.4
2007-2008	42105	1	61	3.79	Yes		2007-2008	1	61	13	Male	Non-Hispanic White		6th Grade														100984
2007-2008	42106	2	71	5	Yes	No	2007-2008	2	71	46	Male	Non-Hispanic Black	Married	College Graduate or above		no	55	9	50	60	100	70	30	0	60	25	100	23376
2007-2008	42107	1	69	4.38	Yes	Yes	2007-2008	1	69	78	Male	Non-Hispanic White	Married	College Graduate or above		no	69.4444	9	50	100	75	100	70	40	60	30	100	49806.6
2007-2008	42108	2	62	0.79	Yes	No	2007-2008	2	62	44	Female	Non-Hispanic White	Married	High School Grad/GED or Equivalent	no	yes	46.1111	9	80	0	0	100	30	20	30	80	75	41578
2007-2008	42109	2	62	3.57	No	No	2007-2008	2	62	29	Female	Other Race - Including Multi-Racial	Married	Some College or AA degree	no	no	96.6667	9	80	100	100	90	100	100	100	100	100	81745.1
2007-2008	42110	2	69	3.57	Yes	No	2007-2008	2	69	52	Female	Other Hispanic	Married	9-11th Grade (Includes 12th grade with no diploma)		no												15328.1
2007-2008	42111	2	59	2.45	Yes	No	2007-2008	2	59	30	Male	Non-Hispanic White	Married	High School Grad/GED or Equivalent		no	68.3333	9	0	100	0	70	70	100	100	75	100	49392.8
2007-2008	42112	1	69	4.36	Yes		2007-2008	1	69	11	Male	Non-Hispanic White		5th Grade														46733.8
2007-2008	42113	1	70	2.91	Yes		2007-2008	1	70	0	Female	Non-Hispanic Black																10444.3
2007-2008	42114	1	61	4.12	Yes		2007-2008	1	61	3	Male	Non-Hispanic White																63370.2
2007-2008	42115	1	69	2.33	Yes		2007-2008	1	69	0	Male	Non-Hispanic White																12707
2007-2008	42116	1	73	0.56	Yes		2007-2008	1	73	1	Female	Mexican American																4654.76
2007-2008	42117	2	61	1.13	Yes		2007-2008	2	61	6	Male	Other Hispanic		Never Attended / Kindergarten Only														6589.32
2007-2008	42118	2	62	2.5	No	No	2007-2008	2	62	23	Female	Non-Hispanic White	Married	Less Than 9th Grade	no	no												59904.2
2007-2008	42119	1	61	0.46	No	No	2007-2008	1	61	38	Female	Non-Hispanic White	Divorced	9-11th Grade (Includes 12th grade with no diploma)	no	no	40	9	0	0	0	100	15	20	100	50	75	92870.6
2007-2008	42120	1	62	5	Yes	No	2007-2008	1	62	72	Male	Other Race - Including Multi-Racial	Widowed	College Graduate or above		no	85.5556	9	80	100	100	100	100	80	60	50	100	12423
2007-2008	42121	1	60	2.18	Yes		2007-2008	1	60	16	Female	Non-Hispanic White		10th Grade														27197.4
2007-2008	42122	1	60	5	Yes		2007-2008	1	60	0	Female	Non-Hispanic White																14442
2007-2008	42123	1	71	1.25	Yes	No	2007-2008	1	71	61	Male	Other Hispanic	Married	Some College or AA degree		no	81.1111	9	100	100	100	70	70	60	100	30	100	5011.18
2007-2008	42124	2	71	5	Yes	No	2007-2008	2	71	66	Male	Non-Hispanic Black	Divorced	Some College or AA degree		no	77.7778	9	80	100	75	100	70	80	40	55	100	7086.55
2007-2008	42125	2	67	2.36	Yes	No	2007-2008	2	67	80	Male	Non-Hispanic Black	Married	Less Than 9th Grade		no												11151.9
2007-2008	42126	1	63	5	Yes	No	2007-2008	1	63	50	Male	Non-Hispanic White	Married	Some College or AA degree		no												80678.2
2007-2008	42127	1	60	1.26	Yes	No	2007-2008	1	60	60	Female	Other Hispanic	Married	9-11th Grade (Includes 12th grade with no diploma)		no	67.2222	9	0	90	80	100	70	60	100	55	50	5558.4
2007-2008	42128	1	61	4.12	Yes		2007-2008	1	61	11	Female	Non-Hispanic White		4th Grade		no												22297.7
2007-2008	42129	2	66	1.09	Yes		2007-2008	2	66	11	Female	Non-Hispanic White		4th Grade														29235.8
2007-2008	42130	2	62	5	Yes	No	2007-2008	2	62	41	Female	Non-Hispanic White	Married	High School Grad/GED or Equivalent	no	no												130135
2007-2008	42131	2	62	1.06	No	No	2007-2008	2	62	28	Male	Non-Hispanic White	Separated	High School Grad/GED or Equivalent		no	73.8889	9	25	100	0	40	100	100	100	100	100	62187.4
2007-2008	42132	2	72	1.08	Yes	No	2007-2008	2	72	37	Female	Non-Hispanic White	Divorced	College Graduate or above	no	no	53.8889	9	25	0	100	40	0	60	60	100	100	140414
2007-2008	42133	1	73	5	No	No	2007-2008	1	73	63	Female	Mexican American	Married	Some College or AA degree		no												9548.79
2007-2008	42134	1	64	1.31	No	No	2007-2008	1	64	27	Female	Mexican American	Married	High School Grad/GED or Equivalent	yes	no	81.1111	8	50	100	80	100	100	100		100	100	9617.06
2007-2008	42135	1	64	2.88	No	No	2007-2008	1	64	50	Male	Non-Hispanic White	Divorced	9-11th Grade (Includes 12th grade with no diploma)		no	55.5556	9	0	100	75	100	100	0	0	25	100	46264.6
2007-2008	42136	1	68	1.83	Yes		2007-2008	1	68	10	Male	Non-Hispanic Black		3rd Grade														10967.9
2007-2008	42137	1	62	5	Yes	No	2007-2008	1	62	39	Male	Non-Hispanic White	Married	Some College or AA degree		no												58330.9
2007-2008	42138	1	59	0.33	No		2007-2008	1	59	19	Female	Non-Hispanic Black		High School Graduate														26930.5
2007-2008	42139	1	62	1.45	Yes		2007-2008	1	62	18	Male	Mexican American		11th Grade														4309.9
2007-2008	42140	1	61	2.06	Yes		2007-2008	1	61	2	Female	Non-Hispanic White																48395.5
2007-2008	42141	2	68	0.36	Yes		2007-2008	2	68	16	Female	Non-Hispanic Black		10th Grade														41150.4
2007-2008	42142	1	71	4.53	Yes		2007-2008	1	71	8	Female	Mexican American		2nd Grade														28581.6
2007-2008	42143	2	63	4.64	Yes	No	2007-2008	2	63	53	Female	Non-Hispanic White	Married	9-11th Grade (Includes 12th grade with no diploma)		no	54.4444	9	25	100	0	20	70	100	100	25	50	89175
2007-2008	42144	1	71	0.58	Yes	No	2007-2008	1	71	51	Female	Mexican American	Separated	9-11th Grade (Includes 12th grade with no diploma)		no	72.2222	9	50	100	0	100	100	0	100	100	100	34830.6
2007-2008	42145	2	70	2.42	Yes		2007-2008	2	70	16	Male	Non-Hispanic White		9th Grade														36461.1
2007-2008	42146	1	70		No	No	2007-2008	1	70	55	Male	Mexican American	Married	Less Than 9th Grade		no	80	9	80	100	50	100	100	40	100	100	50	4959.03
2007-2008	42147	1	66	0.61	No	No	2007-2008	1	66	72	Female	Mexican American	Widowed	Less Than 9th Grade		no	57.2222	9	50	0	100	100	0	40	100	25	100	23675.3
2007-2008	42148	1	68	4.25	Yes		2007-2008	1	68	3	Male	Other Hispanic
2007-2008	42149	1	63	4.97	Yes		2007-2008	1	63	2	Female	Non-Hispanic White
2007-2008	42150	1	61	3.11	Yes		2007-2008	1	61	12	Female	Non-Hispanic White		6th Grade														46832.9
2007-2008	42151	2	72	4.26	No	No	2007-2008	2	72	32	Female	Other Hispanic	Married	9-11th Grade (Includes 12th grade with no diploma)	no	no	82.2222	9	50	100	100	100	30	60	100	100	100	43478.9
2007-2008	42152	2	68	1.51	No	No	2007-2008	2	68	49	Female	Non-Hispanic Black	Separated	9-11th Grade (Includes 12th grade with no diploma)		no												19159.3
2007-2008	42153	1	74	0.3	Yes		2007-2008	1	74	11	Male	Non-Hispanic Black		4th Grade														17574.2
2007-2008	42154	2	59		Yes	No	2007-2008	2	59	75	Male	Non-Hispanic White	Married	Less Than 9th Grade		yes	57.2222	9	25	0	100	100	70	80	40	0	100	25496.4
2007-2008	42155	2	70	1.41	No		2007-2008	2	70	0	Male	Mexican American																12572.2
2007-2008	42156	2	67	0.68	Yes		2007-2008	2	67	6	Male	Mexican American		Never Attended / Kindergarten Only														6735.7
2007-2008	42157	1	61	5	Yes	No	2007-2008	1	61	67	Female	Non-Hispanic White	Widowed	College Graduate or above		no	87.7778	9	80	100	100	100	70	40	100	100	100	57925
2007-2008	42158	2	65	1.37	Yes		2007-2008	2	65	9	Female	Non-Hispanic Black		3rd Grade
2007-2008	42159	2	61	5	Yes	No	2007-2008	2	61	43	Female	Non-Hispanic White	Married	College Graduate or above	no	no	77.7778	9	50	100	100	100	100	40	60	75	75	64129.7
2007-2008	42160	2	72	0.03	No	Yes	2007-2008	2	72	43	Female	Mexican American	Divorced	Less Than 9th Grade	no	no	61.6667	8	0	80	100	70	30	100		100	75	9517.23
2007-2008	42161	2	59	0.81	Yes	Yes	2007-2008	2	59	72	Male	Non-Hispanic White	Divorced	High School Grad/GED or Equivalent		no	86.1111	9	100	100	100	70	70	60	100	75	100	9094.73
2007-2008	42162	2	67	1.13	Yes		2007-2008	2	67	2	Female	Mexican American																4191.28
2007-2008	42163	2	61	1.34	Yes	No	2007-2008	2	61	24	Male	Other Hispanic	Living with partner	High School Grad/GED or Equivalent		no
2007-2008	42164	1	60	1.18	No	No	2007-2008	1	60	60	Male	Mexican American	Divorced	Some College or AA degree		no	73.3333	9	25	100	55	100	70	100	60	50	100	5676.71
2007-2008	42165	1	59	0.71	Yes	No	2007-2008	1	59	67	Male	Non-Hispanic Black	Living with partner	Less Than 9th Grade		no	44.4444	9	25	100	0	20	15	100	60	5	75	7776.04
2007-2008	42166	1	68	3.32	No	No	2007-2008	1	68	22	Male	Non-Hispanic Black	Never married	Some College or AA degree		no	65.5556	9	0	0	100	40	100	100	100	100	50	53103.7
2007-2008	42167	1	60	2.84	Yes	Yes	2007-2008	1	60	80	Female	Non-Hispanic White	Divorced	High School Grad/GED or Equivalent		no	47.2222	8	50	0	75	100		60	60	5	75	37728.1
2007-2008	42168	2	68	0	No	No	2007-2008	2	68	23	Female	Other Hispanic	Never married	High School Grad/GED or Equivalent	no	no	71.1111	9	0	100	0	40	100	100	100	100	100	10055.8
2007-2008	42169	2	62	1.06	No		2007-2008	2	62	7	Male	Non-Hispanic White		Never Attended / Kindergarten Only														13340
2007-2008	42170	2	63	1.2	Yes	No	2007-2008	2	63	79	Male	Non-Hispanic White	Married	9-11th Grade (Includes 12th grade with no diploma)		no	65	9	25	0	100	70	70	80	60	80	100	39079.8
2007-2008	42171	2	72	2.36	No	No	2007-2008	2	72	41	Male	Other Hispanic	Married	High School Grad/GED or Equivalent		no
2007-2008	42172	2	67	3.65	Yes	No	2007-2008	2	67	71	Female	Non-Hispanic Black	Widowed	High School Grad/GED or Equivalent		no	76.6667	9	100	90	100	70	30	80	40	80	100	13517
2007-2008	42173	2	66	5	Yes	No	2007-2008	2	66	50	Male	Other Race - Including Multi-Racial	Married	College Graduate or above		no	80	9	80	100	100	100	70	80	60	30	100	69997
2007-2008	42174	1	72	0.67	Yes		2007-2008	1	72	11	Female	Non-Hispanic Black		5th Grade														5450.89
2007-2008	42175	1	61	5	Yes	No	2007-2008	1	61	31	Female	Non-Hispanic White	Married	Some College or AA degree	no	no	87.7778	9	25	90	75	100	100	100	100	100	100	70017.6
2007-2008	42176	2	64	0.95	Yes		2007-2008	2	64	11	Female	Non-Hispanic Black		5th Grade														5951.19
2007-2008	42177	2	72	3.69	Yes	No	2007-2008	2	72	34	Female	Mexican American	Married	Some College or AA degree	no	no	70	9	25	100	100	100	30	0	100	75	100	12162.2
2007-2008	42178	2	63	2.02	Yes		2007-2008	2	63	6	Female	Non-Hispanic White		Never Attended / Kindergarten Only														68483.8
2007-2008	42179	1	61	1.26	Yes	No	2007-2008	1	61	30	Male	Non-Hispanic White	Married	Some College or AA degree		no	57.2222	9	0	100	0	40	0	100	100	75	100	13800.6
2007-2008	42180	2	61	3.57	Yes	No	2007-2008	2	61	74	Male	Non-Hispanic White	Married	High School Grad/GED or Equivalent		no	63.3333	9	25	100	100	70	15	40	40	80	100	32406.1
2007-2008	42181	2	62		Yes	Yes	2007-2008	2	62	80	Male	Non-Hispanic White	Married	Less Than 9th Grade		no	74.4444	9	80	0	100	100	70	80	60	80	100	20666.5
2007-2008	42182	1	63	2.07	Yes		2007-2008	1	63	4	Male	Other Race - Including Multi-Racial																24277.7
2007-2008	42183	1	63	4.38	Yes	No	2007-2008	1	63	41	Female	Non-Hispanic White	Never married	High School Grad/GED or Equivalent	no	no	67.7778	9	50	100	0	70	70	60	60	100	100	143984
2007-2008	42184	2	68	2.18	Yes		2007-2008	2	68	2	Male	Non-Hispanic Black																4396.48
2007-2008	42185	1	63	1.96	Yes	Yes	2007-2008	1	63	57	Male	Non-Hispanic White	Never married	Some College or AA degree		no	80	9	80	100	75	70	70	100	100	50	75	41170.2
2007-2008	42186	1	61	0.51	Yes		2007-2008	1	61	7	Female	Non-Hispanic Black		1st Grade														4321.69
2007-2008	42187	1	64	1.96	Yes	No	2007-2008	1	64	52	Female	Non-Hispanic Black	Widowed	High School Grad/GED or Equivalent		no												32476.2
2007-2008	42188	2	61	1.65	Yes		2007-2008	2	61	4	Female	Non-Hispanic White																14050.1
2007-2008	42189	1	69	1.41	Yes	No	2007-2008	1	69	50	Male	Mexican American	Married	Less Than 9th Grade		no	70.5556	8	25	100	100	100	70	40		100	100	24149.7
2007-2008	42190	2	59	1.31	Yes	Yes	2007-2008	2	59	80	Male	Non-Hispanic White	Married	High School Grad/GED or Equivalent		no	63.8889	9	50	100	100	70	70	40	40	30	75	12208.2
2007-2008	42191	2	71	0.4	Yes		2007-2008	2	71	3	Male	Other Race - Including Multi-Racial																9135.86
2007-2008	42192	2	61	3.41	No		2007-2008	2	61	16	Female	Non-Hispanic Black		11th Grade														8732.1
2007-2008	42193	2	60	5	Yes	No	2007-2008	2	60	61	Male	Non-Hispanic White	Married	Some College or AA degree		no	46.6667	9	25	0	50	70	15	80	100	30	50	81442.2
2007-2008	42194	1	59	0.41	Yes		2007-2008	1	59	6	Female	Non-Hispanic Black		Never Attended / Kindergarten Only														16469.5
2007-2008	42195	2	64		Yes		2007-2008	2	64	4	Male	Mexican American																7931.65
2007-2008	42196	2	71	2.22	Yes		2007-2008	2	71	9	Female	Mexican American		3rd Grade														4807.33
2007-2008	42197	1	71	2.19	Yes	No	2007-2008	1	71	65	Male	Mexican American	Married	Some College or AA degree		no	73.3333	9	50	100	100	70	70	80	60	30	100	6774.61
2007-2008	42198	1	66	2.28	No	No	2007-2008	1	66	26	Female	Mexican American	Married	Some College or AA degree	no	no	77.7778	9	25	100	100	100	15	100	60	100	100	55025.9
2007-2008	42199	2	67	0.24	No	No	2007-2008	2	67	20	Female	Non-Hispanic White	Never married	Some College or AA degree	no	no	75	9	0	0	100	100	100	100	100	100	75	97176
2007-2008	42200	1	64	1.71	Yes	No	2007-2008	1	64	65	Male	Non-Hispanic White	Married	High School Grad/GED or Equivalent		no	63.8889	9	25	0	100	100	30	80	40	100	100	58136.1
2007-2008	42201	2	72		Yes	No	2007-2008	2	72	34	Male	Other Race - Including Multi-Racial	Married	College Graduate or above		no												47272
2007-2008	42202	1	69	5	Yes	No	2007-2008	1	69	30	Female	Non-Hispanic White	Married	College Graduate or above	no	no	91.6667	9	25	100	100	100	100	100	100	100	100	58437
2007-2008	42203	1	69	0.73	No		2007-2008	1	69	11	Female	Non-Hispanic White		6th Grade														82622.4
2007-2008	42204	2	70	5	Yes		2007-2008	2	70	17	Female	Mexican American		More than high school														6872.34
2007-2008	42205	1	67	2.42	Yes		2007-2008	1	67	13	Male	Non-Hispanic Black		7th Grade														40910.2
2007-2008	42206	1	66	1.24	No	No	2007-2008	1	66	56	Female	Mexican American	Married	Some College or AA degree		no												8704.95
2007-2008	42207	2	68	5	Yes		2007-2008	2	68	5	Female	Non-Hispanic White																43999.6
2007-2008	42208	2	70		Yes		2007-2008	2	70	14	Female	Mexican American		9th Grade														19168.3
2007-2008	42209	1	60	5	Yes		2007-2008	1	60	17	Female	Non-Hispanic White		10th Grade		no												27197.4
2007-2008	42210	1	61	0.23	Yes	No	2007-2008	1	61	25	Female	Non-Hispanic White	Living with partner	9-11th Grade (Includes 12th grade with no diploma)	no	no	51.1111	9	0	0	0	90	30	40	100	100	100	166849
2007-2008	42211	1	67	3.65	Yes	No	2007-2008	1	67	61	Female	Non-Hispanic White	Married	College Graduate or above		yes	74.4444	9	80	100	75	100	70	20	100	25	100	50532.5
2007-2008	42212	2	63	5	Yes	No	2007-2008	2	63	50	Male	Non-Hispanic White	Married	Some College or AA degree		no	56.6667	9	0	0	100	70	30	60	100	50	100	56494.8
2007-2008	42213	1	70	5	Yes		2007-2008	1	70	15	Female	Non-Hispanic White		9th Grade		no												31419.8
2007-2008	42214	2	66	4.29	Yes		2007-2008	2	66	16	Female	Non-Hispanic White		10th Grade														131720
2007-2008	42215	1	62	0.18	Yes	No	2007-2008	1	62	77	Male	Other Hispanic	Married	9-11th Grade (Includes 12th grade with no diploma)		yes	73.8889	9	80	100	75	70	30	100	60	75	75	4769.58
2007-2008	42216	2	62	2.5	No		2007-2008	2	62	2	Female	Non-Hispanic White																29905.1
2007-2008	42217	2	67	3.37	Yes	No	2007-2008	2	67	80	Female	Non-Hispanic White	Widowed	High School Grad/GED or Equivalent		no
2007-2008	42218	2	72	4.64	No		2007-2008	2	72	6	Male	Other Hispanic		Never Attended / Kindergarten Only														4909.12
2007-2008	42219	2	63	3.77	Yes		2007-2008	2	63	18	Female	Non-Hispanic White		High School Graduate
2007-2008	42220	1	60	1.61	Yes	Yes	2007-2008	1	60	69	Male	Non-Hispanic White	Married	Some College or AA degree		no	66.6667	9	25	100	75	100	70	40	10	80	100	54648.5
2007-2008	42221	1	74	0.99	Yes		2007-2008	1	74	4	Male	Non-Hispanic White
2007-2008	42222	2	62	1.09	Yes		2007-2008	2	62	10	Female	Other Race - Including Multi-Racial		3rd Grade														6061.84
2007-2008	42223	1	59	2.54	Yes		2007-2008	1	59	2	Male	Non-Hispanic Black																14542
2007-2008	42224	2	68	0.58	Yes	No	2007-2008	2	68	23	Male	Non-Hispanic White	Never married	Some College or AA degree		no	86.6667	9	50	100	100	100	70	60	100	100	100	48472.4
2007-2008	42225	1	65	1.92	No		2007-2008	1	65	0	Male	Mexican American																2014.01
2007-2008	42226	2	70	2.02	Yes		2007-2008	2	70	0	Female	Non-Hispanic White																14535.1
2007-2008	42227	2	62	5	Yes		2007-2008	2	62	12	Male	Non-Hispanic White		5th Grade		no												28475.6
2007-2008	42228	2	65	5	Yes		2007-2008	2	65	5	Male	Non-Hispanic White																81226.8
2007-2008	42229	2	67	3.3	Yes	No	2007-2008	2	67	25	Male	Non-Hispanic Black	Never married	High School Grad/GED or Equivalent		no												53480.7
2007-2008	42230	1	69	0.95	Yes		2007-2008	1	69	5	Female	Other Hispanic																19030.4
2007-2008	42231	2	68	1.42	Yes		2007-2008	2	68	0	Male	Non-Hispanic Black																12204.8
2007-2008	42232	1	62	1.36	Yes	No	2007-2008	1	62	61	Female	Other Hispanic	Married	Some College or AA degree		no	59.4444	9	80	0	100	100	30	0	100	50	75	4204.19
2007-2008	42233	1	73	3.23	No	No	2007-2008	1	73	52	Male	Other Hispanic	Never married	Less Than 9th Grade		no
2007-2008	42234	1	61	5	Yes	No	2007-2008	1	61	56	Male	Non-Hispanic White	Married	College Graduate or above		no
2007-2008	42235	2	72	1.47			2007-2008	2	72	4	Female	Other Hispanic																8427.96
2007-2008	42236	2	61	3.77	Yes		2007-2008	2	61	6	Male	Non-Hispanic White		Never Attended / Kindergarten Only														34871.9
2007-2008	42237	1	68	2.92	Yes	No	2007-2008	1	68	63	Male	Other Race - Including Multi-Racial	Married	College Graduate or above		no												65882.9
2007-2008	42238	2	61	3.52	Yes	No	2007-2008	2	61	30	Male	Non-Hispanic White	Married	Some College or AA degree		no	69.4444	9	0	100	100	90	100	80	0	80	75	51407.8
2007-2008	42239	2	61	5	Yes	No	2007-2008	2	61	58	Male	Non-Hispanic White	Married	College Graduate or above		no	72.2222	9	0	100	100	100	30	20	100	100	100	72303.2
2007-2008	42240	1	63	5	Yes	No	2007-2008	1	63	46	Female	Non-Hispanic White	Married	College Graduate or above		no
2007-2008	42241	2	66	1.08	Yes		2007-2008	2	66	0	Male	Mexican American																3000.98
2007-2008	42242	2	65	1.41	Yes		2007-2008	2	65	0	Male	Mexican American																3291.74
2007-2008	42243	1	62	3.11	Yes		2007-2008	1	62	11	Male	Other Hispanic		4th Grade														3170.58
2007-2008	42244	1	62	2.04	No	No	2007-2008	1	62	40	Male	Other Hispanic	Married	High School Grad/GED or Equivalent		no	71.1111	8	0	100	100	70	70	100	100		100	9174.67
2007-2008	42245	1	62	3.11	Yes		2007-2008	1	62	17	Female	Other Hispanic		High School Graduate														22833.6
2007-2008	42246	2	61	0.96	Yes	No	2007-2008	2	61	36	Female	Mexican American	Married	Less Than 9th Grade	no	no	77.7778	9	50	100	100	100	15	60	100	100	75	14248.6
2007-2008	42247	2	66	1.93	Yes		2007-2008	2	66	6	Female	Non-Hispanic White		Never Attended / Kindergarten Only														41113.5
2007-2008	42248	1	59	5	Yes	No	2007-2008	1	59	27	Female	Non-Hispanic White	Married	College Graduate or above	no	no	80	9	0	90	100	100	30	100	100	100	100	176251
2007-2008	42249	2	70	2.04	Yes	No	2007-2008	2	70	35	Male	Non-Hispanic Black	Married	Some College or AA degree		no												8455.75
2007-2008	42250	1	71	3.52	Yes		2007-2008	1	71	16	Male	Mexican American		9th Grade		no												7747.75
2007-2008	42251	2	72		Yes	No	2007-2008	2	72	43	Male	Mexican American	Married	Less Than 9th Grade		no	77.7778	9	50	100	100	70	70	60	100	50	100	10119
2007-2008	42252	1	59	1.16	Yes	No	2007-2008	1	59	21	Female	Non-Hispanic Black	Never married	Some College or AA degree	yes	no	54.4444	8	25	90	5	100	30	40		100	100	39236.3
2007-2008	42253	2	61	1.34	Yes		2007-2008	2	61	1	Female	Other Hispanic																19203.3
2007-2008	42254	2	74	1.89	Yes		2007-2008	2	74	2	Female	Mexican American
2007-2008	42255	1	61	1	Yes	No	2007-2008	1	61	68	Male	Non-Hispanic White	Divorced	High School Grad/GED or Equivalent		no	60.5556	9	50	0	55	100	70	20	100	50	100	21606.3
2007-2008	42256	2	61		Yes		2007-2008	2	61	0	Female	Non-Hispanic White																18361
2007-2008	42257	1	62	1.45	Yes		2007-2008	1	62	19	Male	Mexican American		12th Grade, No Diploma														16225.1
2007-2008	42258	1	64	0.99	Yes		2007-2008	1	64	2	Female	Non-Hispanic Black																6871.23
2007-2008	42259	1	71	2.1	Yes	No	2007-2008	1	71	80	Female	Mexican American	Widowed	Less Than 9th Grade		no
2007-2008	42260	2	60		Yes	Yes	2007-2008	2	60	59	Male	Non-Hispanic White	Married	Less Than 9th Grade		no	38.8889	9	25	0	75	0	30	60	60	100	0	53669.8
2007-2008	42261	2	63	2.42	Yes		2007-2008	2	63	2	Male	Non-Hispanic White
2007-2008	42262	2	61	5	Yes	Yes	2007-2008	2	61	50	Male	Non-Hispanic White	Married	High School Grad/GED or Equivalent		no	75	9	25	100	100	70	70	60	100	50	100	201183
2007-2008	42263	2	63	5	Yes	Yes	2007-2008	2	63	50	Female	Non-Hispanic White	Living with partner	Some College or AA degree		no												103684
2007-2008	42264	1	61	0.29	Yes		2007-2008	1	61	10	Female	Non-Hispanic Black		5th Grade														11911.3
2007-2008	42265	2	70	5	Yes	No	2007-2008	2	70	60	Male	Other Hispanic	Married	High School Grad/GED or Equivalent		no	53.3333	9	25	0	75	40	30	60	100	50	100	6723.21
2007-2008	42266	1	59	2.54	Yes		2007-2008	1	59	3	Female	Non-Hispanic Black																22309.3
2007-2008	42267	1	61	1.62	Yes		2007-2008	1	61	19	Male	Non-Hispanic White		More than high school														89765.7
2007-2008	42268	2	64	1.41	No	No	2007-2008	2	64	31	Male	Non-Hispanic White	Married	High School Grad/GED or Equivalent		no	75	9	50	100	25	70	70	60	100	100	100	20181.9
2007-2008	42269	1	65	2.43	Yes	No	2007-2008	1	65	69	Female	Other Hispanic	Widowed	Less Than 9th Grade		no	66.1111	9	80	90	100	100	70	40	10	5	100	8620.61
2007-2008	42270	1	62	4.08	Yes		2007-2008	1	62	0	Male	Other Hispanic																2960.03
2007-2008	42271	1	65	0.73	Yes		2007-2008	1	65	4	Male	Non-Hispanic Black																7756.96
2007-2008	42272	1	61	1.21	Yes		2007-2008	1	61	8	Male	Non-Hispanic Black		2nd Grade														17716.5
2007-2008	42273	2	69	0.57	No	No	2007-2008	2	69	37	Male	Other Race - Including Multi-Racial	Never married	Some College or AA degree		no	65	9	80	100	0	70	100	60	100	50	25	26767.2
2007-2008	42274	2	69	1.73	Yes	No	2007-2008	2	69	22	Female	Other Hispanic	Never married	Some College or AA degree	no	no	69.4444	9	50	100	0	0	100	100	100	100	75	16142.1
2007-2008	42275	1	72	1.02	No	No	2007-2008	1	72	63	Female	Other Hispanic	Never married	College Graduate or above		no	81.1111	9	80	100	100	100	70	40	60	80	100	6789.19
2007-2008	42276	2	72	1.06	Yes	No	2007-2008	2	72	67	Female	Non-Hispanic White	Widowed	9-11th Grade (Includes 12th grade with no diploma)		no
2007-2008	42277	2	62	1.17	Yes		2007-2008	2	62	0	Female	Non-Hispanic White																5161.87
2007-2008	42278	2	65	5	Yes		2007-2008	2	65	4	Male	Non-Hispanic White																164784
2007-2008	42279	1	63	5	Yes		2007-2008	1	63	8	Female	Non-Hispanic White		2nd Grade														96709.3
2007-2008	42280	2	60	3.65	Yes	No	2007-2008	2	60	58	Female	Non-Hispanic White	Never married	High School Grad/GED or Equivalent		no	81.6667	9	25	80	80	70	100	100	100	80	100	167371
2007-2008	42281	2	72	5	Yes	No	2007-2008	2	72	24	Female	Mexican American	Married	College Graduate or above	no	no	94.4444	9	50	100	100	100	100	100	100	100	100	12037.8
2007-2008	42282	1	61	0.29	Yes		2007-2008	1	61	9	Male	Non-Hispanic Black		3rd Grade														13136
2007-2008	42283	1	62		No	No	2007-2008	1	62	41	Female	Mexican American	Separated	High School Grad/GED or Equivalent	no	no	57.7778	8	50	100	75	90	30	0		100	75	29446.8
2007-2008	42284	2	65	3.4	No	No	2007-2008	2	65	51	Female	Mexican American	Married	Less Than 9th Grade		no	72.7778	9	50	100	0	70	100	60	100	100	75	10404.8
2007-2008	42285	1	72	1.66	No	No	2007-2008	1	72	61	Female	Other Hispanic	Divorced	College Graduate or above		no	86.1111	9	80	90	100	100	70	60	100	75	100	4410.2
2007-2008	42286	1	69	5	Yes		2007-2008	1	69	12	Male	Non-Hispanic White		6th Grade
2007-2008	42287	1	74	2.6	Yes	No	2007-2008	1	74	66	Female	Non-Hispanic Black	Divorced	Some College or AA degree		no	73.8889	9	50	100	0	100	100	80	60	100	75	9857.59
2007-2008	42288	1	62	5	Yes	No	2007-2008	1	62	51	Female	Other Hispanic	Married	9-11th Grade (Includes 12th grade with no diploma)		no	77.2222	9	80	80	0	100	100	60	100	75	100	22797.4
2007-2008	42289	1	62	1.31	Yes		2007-2008	1	62	9	Female	Non-Hispanic White		3rd Grade														10031.2
2007-2008	42290	2	72	0.18	Yes		2007-2008	2	72	4	Male	Mexican American																10902.2
2007-2008	42291	2	66	4.64	Yes	Yes	2007-2008	2	66	70	Female	Non-Hispanic White	Married	College Graduate or above		no	70.5556	9	100	100	100	70	15	40	60	50	100	39332.9
2007-2008	42292	1	70	5	Yes	No	2007-2008	1	70	60	Female	Non-Hispanic White	Married	College Graduate or above		no
2007-2008	42293	2	62	4.48	Yes		2007-2008	2	62	12	Male	Non-Hispanic White		5th Grade														97881
2007-2008	42294	2	72	1.71	Yes	Yes	2007-2008	2	72	63	Male	Mexican American	Divorced	Some College or AA degree		no												13058.8
2007-2008	42295	1	64	4.09	Yes	Yes	2007-2008	1	64	75	Female	Non-Hispanic Black	Married	High School Grad/GED or Equivalent		no												10553.1
2007-2008	42296	2	67		Yes	No	2007-2008	2	67	80	Female	Non-Hispanic White	Widowed	High School Grad/GED or Equivalent		no	84.4444	9	50	90	100	100	100	20	100	100	100	31371.1
2007-2008	42297	1	61	4.67	Yes	No	2007-2008	1	61	65	Female	Non-Hispanic White	Married	High School Grad/GED or Equivalent		no	79.4444	9	25	100	100	100	70	80	60	80	100	53243.9
2007-2008	42298	2	59	1.71	Yes	No	2007-2008	2	59	57	Female	Mexican American	Married	High School Grad/GED or Equivalent		no	72.2222	9	25	100	100	100	100	0	100	50	75	30702.3
2007-2008	42299	2	61	2.19	No	No	2007-2008	2	61	40	Male	Non-Hispanic Black	Living with partner	High School Grad/GED or Equivalent		no	76.6667	9	80	100	0	100	70	40	100	100	100	29271.6
2007-2008	42300	2	69	0.58	Yes	No	2007-2008	2	69	75	Female	Other Race - Including Multi-Racial	Separated	College Graduate or above		no	82.2222	9	100	100	100	100	70	60	60	50	100	33881.8
2007-2008	42301	1	70	1.04	No		2007-2008	1	70	12	Female	Mexican American		5th Grade														5124.59
2007-2008	42302	1	59	4.26	Yes		2007-2008	1	59	1	Male	Non-Hispanic Black																9274.37
2007-2008	42303	2	67	0.68	Yes		2007-2008	2	67	0	Female	Mexican American																2211.17
2007-2008	42304	2	62	0.62	Yes	No	2007-2008	2	62	26	Female	Non-Hispanic White	Never married	9-11th Grade (Includes 12th grade with no diploma)	no	no
2007-2008	42305	1	61	2.06	Yes		2007-2008	1	61	17	Male	Non-Hispanic White		12th Grade, No Diploma														98384.9
2007-2008	42306	1	68	2.78	Yes		2007-2008	1	68	12	Male	Non-Hispanic Black		5th Grade														14311.8
2007-2008	42307	2	60	1.71	Yes	No	2007-2008	2	60	66	Female	Non-Hispanic White	Married	High School Grad/GED or Equivalent		no	58.8889	9	0	100	75	100	30	80	20	75	50	67750.8
2007-2008	42308	2	64	1.39	No	No	2007-2008	2	64	23	Female	Non-Hispanic Black	Never married	High School Grad/GED or Equivalent	no	no	83.3333	9	50	0	100	100	100	100	100	100	100	17817.4
2007-2008	42309	2	74	3.13	No	No	2007-2008	2	74	58	Female	Mexican American	Married	High School Grad/GED or Equivalent		no	54.4444	9	50	0	100	100	30	40	40	80	50	6090.54
2007-2008	42310	2	70	5	Yes	Yes	2007-2008	2	70	53	Male	Non-Hispanic White	Married	College Graduate or above		no	77.2222	9	80	100	75	100	70	40	100	30	100	62129.6
2007-2008	42311	1	60	5	Yes	No	2007-2008	1	60	67	Female	Non-Hispanic White	Divorced	Some College or AA degree		no	82.7778	9	25	100	75	100	70	100	100	75	100	93330.6
2007-2008	42312	1	69	5	Yes	No	2007-2008	1	69	35	Female	Non-Hispanic Black	Married	High School Grad/GED or Equivalent	no	no	50	7	25	80	100	70	0			100	75	16906.3
2007-2008	42313	1	64	0.1	Yes		2007-2008	1	64	6	Male	Non-Hispanic Black		Never Attended / Kindergarten Only														6212.41
2007-2008	42314	1	74	2.12	Yes		2007-2008	1	74	3	Male	Non-Hispanic Black																17719.7
2007-2008	42315	1	67	1.84	No	No	2007-2008	1	67	33	Female	Non-Hispanic White	Married	Some College or AA degree	no	no
2007-2008	42316	1	59	0.46	Yes	No	2007-2008	1	59	59	Male	Non-Hispanic Black	Married	9-11th Grade (Includes 12th grade with no diploma)		no
2007-2008	42317	2	65	4.23	Yes		2007-2008	2	65	11	Female	Mexican American		5th Grade														34501
2007-2008	42318	1	61	0.93	No	No	2007-2008	1	61	38	Male	Non-Hispanic White	Never married	High School Grad/GED or Equivalent		yes	63.3333	9	0	100	0	100	100	60	60	50	100	12266
2007-2008	42319	1	67	0.99	Yes	No	2007-2008	1	67	79	Male	Non-Hispanic Black	Widowed	Less Than 9th Grade		no
2007-2008	42320	2	61	5	Yes		2007-2008	2	61	16	Female	Non-Hispanic White		10th Grade														38814.4
2007-2008	42321	1	65	4.95	Yes	No	2007-2008	1	65	62	Female	Non-Hispanic White	Widowed	Some College or AA degree		no	68.8889	9	80	0	100	100	70	100	40	30	100	51483.6
2007-2008	42322	1	60	0.81	No		2007-2008	1	60	9	Female	Non-Hispanic White		3rd Grade														102824
2007-2008	42323	2	62		Yes		2007-2008	2	62	13	Male	Non-Hispanic Black		8th Grade		no												36190.5
2007-2008	42324	1	67	5	Yes		2007-2008	1	67	8	Female	Non-Hispanic White		3rd Grade		no												27083.8
2007-2008	42325	1	64	1.94	Yes		2007-2008	1	64	13	Male	Non-Hispanic Black		5th Grade														38259
2007-2008	42326	2	70	2.82	Yes		2007-2008	2	70	6	Male	Mexican American		Never Attended / Kindergarten Only		no												18312.2
2007-2008	42327	1	59	0.14	Yes		2007-2008	1	59	0	Male	Non-Hispanic Black																20805.3
2007-2008	42328	2	60	4.01	Yes	No	2007-2008	2	60	35	Male	Non-Hispanic White	Married	9-11th Grade (Includes 12th grade with no diploma)		no	85.5556	9	50	100	100	100	70	100	100	50	100	42892.6
2007-2008	42329	2	59	0.96	Yes	No	2007-2008	2	59	80	Male	Non-Hispanic White	Widowed	High School Grad/GED or Equivalent		no	64.4444	9	25	0	100	70	100	100	60	25	100	12602.4
2007-2008	42330	1	62	5	Yes	No	2007-2008	1	62	80	Female	Non-Hispanic White	Widowed	9-11th Grade (Includes 12th grade with no diploma)		no	62.7778	9	25	0	75	100	70	40	100	80	75	24804.8
2007-2008	42331	1	66	2.45	Yes	No	2007-2008	1	66	31	Female	Mexican American	Married	Some College or AA degree	no	no												53311.8
2007-2008	42332	1	68	5	Yes	No	2007-2008	1	68	61	Female	Non-Hispanic Black	Married	Some College or AA degree		no	62.7778	9	50	100	80	40	70	60	60	5	100	20297.7
2007-2008	42333	2	60	2.42	Yes	No	2007-2008	2	60	31	Female	Non-Hispanic White	Married	Some College or AA degree	yes	no	65	8	25	100	50	70	100	40		100	100	18207.5
2007-2008	42334	2	64		Yes		2007-2008	2	64	6	Male	Non-Hispanic Black		1st Grade														21164
2007-2008	42335	2	65		Yes	No	2007-2008	2	65	28	Male	Non-Hispanic White	Married	High School Grad/GED or Equivalent		no	76.1111	9	0	100	25	100	100	100	60	100	100	79383.5
2007-2008	42336	1	66	1.07	No		2007-2008	1	66	2	Male	Mexican American																5999.73
2007-2008	42337	1	66	1.66	Yes		2007-2008	1	66	12	Female	Mexican American		6th Grade														10934.9
2007-2008	42338	2	68	2.14	Yes	No	2007-2008	2	68	64	Male	Non-Hispanic Black	Married	Some College or AA degree		no	35.5556	9	0	0	75	100	0	40	0	5	100	4604.77
2007-2008	42339	2	64	0.63	Yes		2007-2008	2	64	8	Female	Other Race - Including Multi-Racial		2nd Grade														8739.04
2007-2008	42340	1	66	0.87	No	No	2007-2008	1	66	60	Female	Mexican American	Separated	Less Than 9th Grade		no												7297.83
2007-2008	42341	1	62	0.47	No		2007-2008	1	62	11	Female	Other Hispanic		3rd Grade
2007-2008	42342	1	69	2.23	Yes	No	2007-2008	1	69	80	Male	Non-Hispanic White	Married	Some College or AA degree		no	64.4444	9	25	100	75	70	70	40	100	0	100	33775.7
2007-2008	42343	2	72	1.61	Yes		2007-2008	2	72	0	Male	Mexican American																3975.46
2007-2008	42344	1	70	5	No	No	2007-2008	1	70	20	Male	Non-Hispanic White	Never married	High School Grad/GED or Equivalent		no												68695.8
2007-2008	42345	1	65	1.45	Yes	No	2007-2008	1	65	35	Female	Non-Hispanic Black	Divorced	College Graduate or above	no	no	90	9	50	90	100	100	70	100	100	100	100	53959.4
2007-2008	42346	2	62	5	Yes	No	2007-2008	2	62	54	Male	Non-Hispanic White	Never married	High School Grad/GED or Equivalent		no	77.7778	9	50	100	100	100	30	80	60	80	100	46069.4
2007-2008	42347	1	68	3.59	Yes		2007-2008	1	68	6	Male	Non-Hispanic Black		Never Attended / Kindergarten Only														18020.6
2007-2008	42348	2	69	2.88	Yes	No	2007-2008	2	69	23	Male	Non-Hispanic Black	Never married	College Graduate or above		no
2007-2008	42349	1	73	0.15	Yes		2007-2008	1	73	19	Male	Other Race - Including Multi-Racial		More than high school														16471.7
2007-2008	42350	1	73	1.75	Yes	No	2007-2008	1	73	47	Female	Non-Hispanic White	Separated	Some College or AA degree		yes												17688.7
2007-2008	42351	2	59	3.77	Yes	No	2007-2008	2	59	42	Female	Non-Hispanic White	Married	College Graduate or above	no	no	67.2222	9	25	60	100	100	70	0	100	50	100	61057.9
2007-2008	42352	2	70		Yes	No	2007-2008	2	70	60	Male	Mexican American	Married	9-11th Grade (Includes 12th grade with no diploma)		no
2007-2008	42353	2	60	1.25	Yes		2007-2008	2	60	0	Male	Non-Hispanic White																12115.8
2007-2008	42354	2	63	0.9	Yes		2007-2008	2	63	2	Male	Non-Hispanic White																5967.46
2007-2008	42355	1	65	0.54	Yes		2007-2008	1	65	0	Male	Mexican American																2709.68
2007-2008	42356	2	65	5	Yes	No	2007-2008	2	65	35	Female	Non-Hispanic Black	Married	Some College or AA degree	no	no	61.6667	7	25	80	50	100	100			100	100	26829.2
2007-2008	42357	1	59	4.38	Yes	No	2007-2008	1	59	25	Female	Non-Hispanic White	Married	Some College or AA degree	no	no												53416.5
2007-2008	42358	2	70		Yes	No	2007-2008	2	70	64	Female	Mexican American	Married	Less Than 9th Grade		no	68.3333	9	50	60	75	70	30	80	100	100	50	5543.05
2007-2008	42359	1	63		Yes		2007-2008	1	63	14	Male	Non-Hispanic White		8th Grade														30319.4
2007-2008	42360	1	68	0.95	Yes		2007-2008	1	68	9	Female	Non-Hispanic Black		2nd Grade														5012.2
2007-2008	42361	1	69	1.16	Yes	No	2007-2008	1	69	38	Female	Non-Hispanic White	Divorced	Some College or AA degree	no	no	73.8889	9	25	100	0	90	100	100	100	100	50	85294.8
2007-2008	42362	1	69	0.73	No		2007-2008	1	69	16	Male	Non-Hispanic White		11th Grade														58650.5
2007-2008	42363	2	67		No		2007-2008	2	67	17	Male	Non-Hispanic Black		11th Grade														7884.86
2007-2008	42364	2	69	1.81	Yes	No	2007-2008	2	69	77	Male	Mexican American	Married	Less Than 9th Grade		no												11669.5
2007-2008	42365	2	72	3.86	Yes	Yes	2007-2008	2	72	58	Female	Non-Hispanic White	Married	Some College or AA degree		yes	62.2222	9	0	100	100	100	30	20	60	50	100	181414
2007-2008	42366	2	71	5	Yes	No	2007-2008	2	71	47	Female	Non-Hispanic White	Married	College Graduate or above		no	87.2222	9	80	100	100	70	100	60	100	100	75	55096.4
2007-2008	42367	1	71	0.7	Yes		2007-2008	1	71	1	Male	Mexican American																7780.54
2007-2008	42368	1	70	1.67	Yes	No	2007-2008	1	70	60	Male	Other Hispanic	Married	Less Than 9th Grade		no	61.1111	9	0	100	75	70	70	0	60	75	100	2679.45
2007-2008	42369	1	59	0.75	Yes	Yes	2007-2008	1	59	80	Female	Non-Hispanic Black	Widowed	Less Than 9th Grade		no	61.6667	9	80	0	100	0	100	60	60	55	100	11607.8
2007-2008	42370	1	73	0.2	Yes		2007-2008	1	73	19	Male	Non-Hispanic White		More than high school		no												16471.7
2007-2008	42371	2	61	2.56	Yes		2007-2008	2	61	10	Male	Non-Hispanic Black		4th Grade														5775.03
2007-2008	42372	2	59	2.86	Yes	No	2007-2008	2	59	62	Female	Non-Hispanic Black	Married	High School Grad/GED or Equivalent		no
2007-2008	42373	2	69	1.07	Yes	No	2007-2008	2	69	25	Female	Mexican American	Divorced	Some College or AA degree	no	no
2007-2008	42374	1	73	5	Yes		2007-2008	1	73	11	Female	Other Race - Including Multi-Racial		5th Grade														26804.9
2007-2008	42375	2	67	2.46	No	No	2007-2008	2	67	21	Male	Non-Hispanic White	Never married	High School Grad/GED or Equivalent		no	84.4444	9	50	100	100	100	70	40	100	100	100	84632.6
2007-2008	42376	1	68	0.52	Yes	No	2007-2008	1	68	21	Female	Other Race - Including Multi-Racial	Never married	High School Grad/GED or Equivalent	no	no	88.8889	9	0	100	100	100	100	100	100	100	100	99402.5
2007-2008	42377	2	67	5	Yes	No	2007-2008	2	67	36	Male	Non-Hispanic White	Married	High School Grad/GED or Equivalent		no	61.6667	9	0	0	25	100	70	60	100	100	100	45560.7
2007-2008	42378	1	72		Yes	No	2007-2008	1	72	78	Female	Other Hispanic	Widowed	Less Than 9th Grade		no
2007-2008	42379	2	68	1.23	No	No	2007-2008	2	68	62	Female	Other Hispanic	Married	Some College or AA degree		no	82.7778	9	80	100	100	100	70	20	100	75	100	4573.24
2007-2008	42380	2	67	2.22	Yes		2007-2008	2	67	3	Female	Non-Hispanic Black																9013.84
2007-2008	42381	1	61	0.46	Yes	No	2007-2008	1	61	24	Male	Non-Hispanic White	Never married	9-11th Grade (Includes 12th grade with no diploma)		yes	70	9	50	100	0	90	70	20	100	100	100	25407.2
2007-2008	42382	2	62	3.69	Yes	No	2007-2008	2	62	46	Female	Non-Hispanic White	Married	High School Grad/GED or Equivalent		no	77.7778	9	0	100	100	90	70	40	100	100	100	54277.5
2007-2008	42383	2	68	0.48	No	No	2007-2008	2	68	23	Male	Non-Hispanic White	Never married	College Graduate or above		no	86.1111	9	0	100	100	100	100	100	100	75	100	38695.6
2007-2008	42384	2	62	4.64	Yes	No	2007-2008	2	62	23	Male	Non-Hispanic White	Never married	Some College or AA degree		no	53.8889	9	0	100	0	70	70	60	60	25	100	77368.4
2007-2008	42385	2	72	0.81	Yes		2007-2008	2	72	5	Female	Non-Hispanic White																11181.2
2007-2008	42386	1	61	0.41			2007-2008	1	61	12	Male	Non-Hispanic Black		5th Grade		no												22017
2007-2008	42387	1	64	2.92	Yes	No	2007-2008	1	64	33	Male	Non-Hispanic White	Never married	High School Grad/GED or Equivalent		no												18022.8
2007-2008	42388	2	64	4.48	Yes		2007-2008	2	64	7	Male	Other Hispanic		1st Grade														37327.7
2007-2008	42389	2	63		Yes	No	2007-2008	2	63	64	Female	Non-Hispanic White	Married	High School Grad/GED or Equivalent		no	68.8889	9	25	100	0	100	100	60	60	75	100	82745.8
2007-2008	42390	2	65	0.41	Yes		2007-2008	2	65	1	Female	Other Hispanic																8478.18
2007-2008	42391	2	61	0.85	No	No	2007-2008	2	61	25	Male	Non-Hispanic Black	Never married	High School Grad/GED or Equivalent		no	77.2222	9	80	100	0	100	100	40	100	75	100	61697.4
2007-2008	42392	1	64	0.81	Yes	No	2007-2008	1	64	65	Female	Non-Hispanic Black	Divorced	9-11th Grade (Includes 12th grade with no diploma)		no	49.4444	9	25	0	100	100	0	40	100	5	75	8930.56
2007-2008	42393	1	67	1.84	No	No	2007-2008	1	67	37	Male	Non-Hispanic White	Married	High School Grad/GED or Equivalent		no	61.1111	9	50	0	30	100	70	0	100	100	100	34663.1
2007-2008	42394	2	60	1.71	Yes	Yes	2007-2008	2	60	80	Female	Non-Hispanic White	Widowed	High School Grad/GED or Equivalent		yes
2007-2008	42395	2	72		Yes	No	2007-2008	2	72	25	Female	Non-Hispanic Black	Never married	Some College or AA degree	no	no	82.2222	9	25	100	100	100	15	100	100	100	100	21271.8
2007-2008	42396	2	62	2.14	Yes	No	2007-2008	2	62	56	Male	Other Hispanic	Divorced	High School Grad/GED or Equivalent		no	52.2222	8	0	0	100	100	30	60		80	100	6115.37
2007-2008	42397	2	68	2.27	Yes		2007-2008	2	68	1	Female	Non-Hispanic Black
2007-2008	42398	2	70	1.85	Yes		2007-2008	2	70	10	Male	Non-Hispanic Black		4th Grade														4338.28
2007-2008	42399	1	62		No	No	2007-2008	1	62	54	Male	Other Race - Including Multi-Racial	Married	Less Than 9th Grade		no												13383.9
2007-2008	42400	2	63	5	Yes	No	2007-2008	2	63	39	Male	Non-Hispanic White	Married	High School Grad/GED or Equivalent		no	78.8889	9	80	100	50	100	70	60	100	50	100	50853.2
2007-2008	42401	2	67	0.53	Yes		2007-2008	2	67	7	Female	Other Race - Including Multi-Racial		1st Grade														13488.9
2007-2008	42402	2	72	2.5	No	No	2007-2008	2	72	61	Female	Mexican American	Married	Some College or AA degree		no	67.2222	9	50	0	100	70	100	60	100	25	100	5625.42
2007-2008	42403	1	74	0.51	Yes		2007-2008	1	74	11	Male	Non-Hispanic Black		4th Grade
2007-2008	42404	2	59	5	Yes	No	2007-2008	2	59	79	Male	Non-Hispanic White	Married	High School Grad/GED or Equivalent		no	62.7778	9	25	40	75	100	100	100	20	5	100	30318.5
2007-2008	42405	2	64	1.31	Yes	Yes	2007-2008	2	64	71	Female	Non-Hispanic White	Married	High School Grad/GED or Equivalent		no	74.4444	9	80	100	75	100	70	40	100	5	100	20771.6
2007-2008	42406	1	68	0.65	Yes	No	2007-2008	1	68	62	Male	Non-Hispanic Black	Married	High School Grad/GED or Equivalent		yes	67.7778	9	0	100	75	70	70	100	40	55	100	10450.9
2007-2008	42407	2	68	1.15	No	No	2007-2008	2	68	62	Female	Non-Hispanic Black	Widowed	9-11th Grade (Includes 12th grade with no diploma)		yes
2007-2008	42408	2	64	0.88	Yes		2007-2008	2	64	5	Male	Mexican American
2007-2008	42409	1	61	0.87	Yes		2007-2008	1	61	14	Female	Non-Hispanic White		8th Grade
2007-2008	42410	1	66	0.25	No		2007-2008	1	66	11	Female	Mexican American		4th Grade														12796.2
2007-2008	42411	2	73		Yes	No	2007-2008	2	73	28	Female	Other Hispanic	Never married	High School Grad/GED or Equivalent	no	no	61.1111	9	25	0	100	100	100	100	100	0	25	10461.1
2007-2008	42412	1	68	3.39	Yes		2007-2008	1	68	5	Male	Non-Hispanic Black																16457.5
2007-2008	42413	2	68		Yes	No	2007-2008	2	68	31	Female	Non-Hispanic Black	Married	College Graduate or above	no	no												11265.9
2007-2008	42414	1	65		Yes		2007-2008	1	65	6	Male	Mexican American		1st Grade														3989.05
2007-2008	42415	2	62	4.84	Yes	No	2007-2008	2	62	37	Male	Non-Hispanic White	Married	High School Grad/GED or Equivalent		no	50.5556	9	0	100	0	40	15	0	100	100	100	122790
2007-2008	42416	2	65	2.29	Yes	No	2007-2008	2	65	62	Male	Non-Hispanic Black	Divorced	Some College or AA degree		no	76.6667	9	80	100	75	100	15	60	60	100	100	9474.68
2007-2008	42417	2	72	0.56	Yes		2007-2008	2	72	9	Female	Mexican American		3rd Grade														5199.9
2007-2008	42418	2	72	1.47	Yes		2007-2008	2	72	11	Male	Other Hispanic		5th Grade														7616.03
2007-2008	42419	2	72	3.81	Yes		2007-2008	2	72	0	Female	Other Hispanic
2007-2008	42420	1	63	5	Yes	No	2007-2008	1	63	57	Male	Non-Hispanic White	Married	High School Grad/GED or Equivalent		yes	66.6667	9	0	100	0	100	100	40	60	100	100	140765
2007-2008	42421	1	65	1.83	No	No	2007-2008	1	65	55	Male	Mexican American	Married	High School Grad/GED or Equivalent		no	61.6667	9	50	0	100	100	70	40	40	55	100	32461.9
2007-2008	42422	2	74	2.26	No	No	2007-2008	2	74	51	Male	Mexican American	Divorced	Less Than 9th Grade		no	58.8889	9	50	100	75	100	100	0	0	5	100	5938.24
2007-2008	42423	2	67	5	Yes		2007-2008	2	67	7	Male	Non-Hispanic Black		Never Attended / Kindergarten Only														7156.66
2007-2008	42424	2	71	1.07	Yes	No	2007-2008	2	71	64	Female	Non-Hispanic Black	Married	Some College or AA degree		no	65	9	25	80	75	100	30	80	40	55	100	17256.6
2007-2008	42425	1	64	4.12	Yes	No	2007-2008	1	64	46	Female	Non-Hispanic White	Married	Some College or AA degree		no												76193.8
2007-2008	42426	2	71	1.86	Yes	No	2007-2008	2	71	73	Female	Non-Hispanic White	Married	Some College or AA degree		no	85	9	25	100	75	90	100	100	100	75	100	41156.8
2007-2008	42427	2	63	5	Yes	No	2007-2008	2	63	44	Female	Non-Hispanic White	Married	9-11th Grade (Includes 12th grade with no diploma)	no	no
2007-2008	42428	2	61		Yes	No	2007-2008	2	61	53	Male	Non-Hispanic White	Married	Some College or AA degree		no	76.6667	9	100	100	0	100	70	80	60	80	100	61974.2
2007-2008	42429	1	72	3.29	Yes	No	2007-2008	1	72	29	Male	Other Hispanic	Married	High School Grad/GED or Equivalent		no	72.2222	9	25	100	100	40	70	100	60	55	100	29777.3
2007-2008	42430	1	67	0.71	No	No	2007-2008	1	67	28	Male	Non-Hispanic White	Married	High School Grad/GED or Equivalent		yes	85.5556	9	0	100	100	70	100	100	100	100	100	26582.7
2007-2008	42431	1	70	0.96	Yes	No	2007-2008	1	70	42	Male	Non-Hispanic White	Never married	Less Than 9th Grade		no												42898.3
2007-2008	42432	2	69	1.14	No	No	2007-2008	2	69	23	Female	Mexican American	Married	9-11th Grade (Includes 12th grade with no diploma)	no	no	80.5556	9	25	100	100	100	0	100	100	100	100	7731.42
2007-2008	42433	1	66	0.73	Yes	No	2007-2008	1	66	53	Male	Mexican American	Married	Less Than 9th Grade		no	67.2222	9	25	100	0	100	70	80	100	55	75	9617.44
2007-2008	42434	1	62		Yes	No	2007-2008	1	62	22	Male	Mexican American	Never married	9-11th Grade (Includes 12th grade with no diploma)		no												11513.1
2007-2008	42435	1	71	1.18	No	No	2007-2008	1	71	34	Male	Mexican American	Married	9-11th Grade (Includes 12th grade with no diploma)		no												21737.6
2007-2008	42436	2	72		Yes	No	2007-2008	2	72	38	Female	Other Hispanic	Married	High School Grad/GED or Equivalent	no	no												10132
2007-2008	42437	1	64	0.55	Yes	No	2007-2008	1	64	52	Male	Non-Hispanic White	Married	High School Grad/GED or Equivalent		no	68.8889	9	100	100	100	70	0	60	60	30	100	40809.2
2007-2008	42438	2	72	1.14	Yes	No	2007-2008	2	72	67	Female	Mexican American	Divorced	High School Grad/GED or Equivalent		no	73.3333	9	80	80	30	100	70	40	60	100	100	12235.6
2007-2008	42439	1	62	0.39	No	No	2007-2008	1	62	28	Male	Mexican American	Separated	Some College or AA degree		no												44550.9
2007-2008	42440	2	69	5	Yes	No	2007-2008	2	69	31	Male	Non-Hispanic White	Never married	College Graduate or above		no												32683.4
2007-2008	42441	2	70	2.9	Yes	No	2007-2008	2	70	64	Male	Other Race - Including Multi-Racial	Married	High School Grad/GED or Equivalent		yes	47.7778	9	25	100	0	20	30	40	60	55	100	50804.3
2007-2008	42442	1	62	3.9	Yes		2007-2008	1	62	8	Male	Other Hispanic		2nd Grade														4668.96
2007-2008	42443	1	73		Yes		2007-2008	1	73	7	Male	Mexican American		1st Grade														12769.1
2007-2008	42444	1	60		Yes	Yes	2007-2008	1	60	68	Female	Non-Hispanic White	Married	High School Grad/GED or Equivalent		no	71.1111	9	0	100	100	70	70	60	60	80	100	45834.4
2007-2008	42445	2	67	4.01	Yes	No	2007-2008	2	67	36	Female	Non-Hispanic White	Married	Some College or AA degree	no	no	63.3333	9	0	80	100	100	30	60	100	75	25	51384.2
2007-2008	42446	2	65	0.31	No	No	2007-2008	2	65	21	Male	Mexican American	Never married	9-11th Grade (Includes 12th grade with no diploma)		no	70	9	0	0	100	100	70	60	100	100	100	68018.4
2007-2008	42447	1	59	4.31	Yes		2007-2008	1	59	4	Male	Non-Hispanic White
2007-2008	42448	2	74	1.85	Yes		2007-2008	2	74	4	Male	Non-Hispanic Black																24816.5
2007-2008	42449	1	59	0.69	No	No	2007-2008	1	59	80	Male	Non-Hispanic White	Widowed	Less Than 9th Grade		yes	73.3333	9	50	100	75	70	100	80	60	25	100	20088.9
2007-2008	42450	1	68	1.59	Yes	No	2007-2008	1	68	80	Female	Non-Hispanic Black	Widowed	9-11th Grade (Includes 12th grade with no diploma)		no
2007-2008	42451	2	66	3.77	Yes		2007-2008	2	66	17	Female	Non-Hispanic White		More than high school
2007-2008	42452	1	67	2.7	Yes	No	2007-2008	1	67	54	Male	Other Race - Including Multi-Racial	Married	Some College or AA degree		no	65.5556	9	50	100	75	20	30	40	100	75	100	53278.4
2007-2008	42453	2	63	1.06	Yes	No	2007-2008	2	63	74	Male	Non-Hispanic White	Living with partner	9-11th Grade (Includes 12th grade with no diploma)		no	56.6667	9	50	100	75	40	15	40	60	30	100	7118.25
2007-2008	42454	2	63	1.15	Yes	No	2007-2008	2	63	80	Female	Non-Hispanic White	Widowed	9-11th Grade (Includes 12th grade with no diploma)		no	71.6667	9	50	100	100	100	100	20	100	0	75	46114.5
2007-2008	42455	2	71	5	Yes		2007-2008	2	71	7	Male	Mexican American		1st Grade														6114.15
2007-2008	42456	1	61	0.34	Yes		2007-2008	1	61	2	Female	Non-Hispanic Black																24177.6
2007-2008	42457	1	62	1.76	No	No	2007-2008	1	62	27	Male	Mexican American	Never married	High School Grad/GED or Equivalent		no												44084.5
2007-2008	42458	1	63	2.37	Yes		2007-2008	1	63	7	Male	Non-Hispanic White		1st Grade														27320
2007-2008	42459	2	61	5	Yes	No	2007-2008	2	61	57	Female	Non-Hispanic White	Married	College Graduate or above		no	89.4444	9	80	100	100	100	70	80	100	75	100	111379
2007-2008	42460	1	65	5	Yes	No	2007-2008	1	65	59	Male	Non-Hispanic Black	Married	College Graduate or above		no	48.3333	9	50	0	100	100	0	40	40	5	100	10501
2007-2008	42461	2	64	1.41	No		2007-2008	2	64	8	Male	Non-Hispanic White		2nd Grade														13767.6
2007-2008	42462	1	70	2.17	Yes		2007-2008	1	70	11	Male	Other Race - Including Multi-Racial		5th Grade														19693.6
2007-2008	42463	1	70	5	Yes		2007-2008	1	70	1	Female	Non-Hispanic White																17834.5
2007-2008	42464	1	69	4.24	No	No	2007-2008	1	69	52	Female	Mexican American	Living with partner	College Graduate or above		no	71.6667	9	80	0	75	100	30	60	100	100	100	8404.38
2007-2008	42465	2	63		Yes		2007-2008	2	63	9	Male	Non-Hispanic White		3rd Grade		no												45972.3
2007-2008	42466	2	71		Yes		2007-2008	2	71	13	Female	Mexican American		6th Grade														40981.4
2007-2008	42467	1	73	5	Yes	No	2007-2008	1	73	27	Female	Non-Hispanic White	Living with partner	Some College or AA degree	no	no	74.4444	9	0	100	100	40	70	60	100	100	100	50031.2
2007-2008	42468	1	62		Yes	No	2007-2008	1	62	72	Female	Other Hispanic	Divorced	Some College or AA degree		no
2007-2008	42469	1	64	0.32	Yes		2007-2008	1	64	12	Male	Mexican American		5th Grade														29832.6
2007-2008	42470	1	65	2.07	Yes		2007-2008	1	65	0	Male	Mexican American																5180.98
2007-2008	42471	1	63	5	Yes	No	2007-2008	1	63	50	Male	Non-Hispanic White	Married	College Graduate or above		no	77.7778	9	100	100	100	100	70	40	60	30	100	154131
2007-2008	42472	2	72		Yes		2007-2008	2	72	1	Female	Non-Hispanic White																22232.6
2007-2008	42473	1	70	5	Yes	No	2007-2008	1	70	53	Male	Non-Hispanic White	Divorced	College Graduate or above		no	75.5556	9	50	100	100	40	100	40	100	50	100	40169.8
2007-2008	42474	2	70	2.5	Yes	No	2007-2008	2	70	47	Female	Mexican American	Living with partner	High School Grad/GED or Equivalent		no	64.4444	9	50	100	75	70	15	20	100	50	100	30683
2007-2008	42475	1	69	0.69	No	No	2007-2008	1	69	27	Male	Non-Hispanic White	Never married	College Graduate or above		no	85.5556	9	0	100	100	70	100	100	100	100	100	18578.2
2007-2008	42476	1	62	0.84	Yes		2007-2008	1	62	6	Female	Mexican American		Never Attended / Kindergarten Only														3808.44
2007-2008	42477	2	70	0.85	No	No	2007-2008	2	70	25	Male	Mexican American	Living with partner	Less Than 9th Grade		no	73.3333	9	50	100	0	100	70	40	100	100	100	65616.1
2007-2008	42478	1	61	4.32	Yes		2007-2008	1	61	0	Female	Non-Hispanic White																17837.8
2007-2008	42479	1	72	3.09	Yes	No	2007-2008	1	72	55	Female	Non-Hispanic Black	Divorced	High School Grad/GED or Equivalent		no	57.2222	9	50	100	100	100	0	20	40	5	100	16558.2
2007-2008	42480	2	72		Yes		2007-2008	2	72	0	Male	Mexican American																9089.52
2007-2008	42481	1	71	4.37	Yes	No	2007-2008	1	71	30	Female	Mexican American	Living with partner	College Graduate or above	no	no	86.6667	9	50	100	100	100	70	60	100	100	100	23400.1
2007-2008	42482	1	64	0.47	Yes	No	2007-2008	1	64	35	Female	Non-Hispanic Black	Never married	High School Grad/GED or Equivalent	no	no												47961.4
2007-2008	42483	1	71	4.38	Yes	No	2007-2008	1	71	59	Male	Mexican American	Married	Some College or AA degree		no	82.2222	9	50	100	75	70	70	100	100	75	100	9217.23
2007-2008	42484	2	61	5	Yes	No	2007-2008	2	61	72	Female	Non-Hispanic White	Married	Some College or AA degree		no	46.1111	9	0	0	100	100	0	80	30	30	75	32867.4
2007-2008	42485	2	62	2.02	Yes		2007-2008	2	62	8	Male	Non-Hispanic White		Never Attended / Kindergarten Only														33517.7
2007-2008	42486	1	66	0.68	No	No	2007-2008	1	66	32	Female	Mexican American	Separated	Some College or AA degree	no	no	81.6667	9	50	40	100	100	70	100	100	75	100	13806.1
2007-2008	42487	1	66	1.93	No		2007-2008	1	66	11	Male	Mexican American		6th Grade														13548.2
2007-2008	42488	2	64		Yes		2007-2008	2	64	12	Female	Non-Hispanic Black		7th Grade														6717.21
2007-2008	42489	2	67	0.68	No	No	2007-2008	2	67	28	Female	Mexican American	Married	High School Grad/GED or Equivalent	no	no	69.4444	9	25	0	100	70	70	60	100	100	100	9537.41
2007-2008	42490	2	60	1.25	Yes	No	2007-2008	2	60	46	Male	Non-Hispanic White	Married	College Graduate or above		no	50	8	0	100	100	70	30	0		50	100	45454.1
2007-2008	42491	2	69		No	No	2007-2008	2	69	60	Female	Other Hispanic	Divorced	Less Than 9th Grade		no												2997.82
2007-2008	42492	1	59	1.51	Yes	No	2007-2008	1	59	71	Male	Non-Hispanic Black	Married	Less Than 9th Grade		no	65.5556	9	25	40	100	100	70	40	60	55	100	9749.13
2007-2008	42493	1	60	5	Yes	No	2007-2008	1	60	57	Male	Non-Hispanic White	Divorced	College Graduate or above		no	70	9	0	100	0	100	70	60	100	100	100	133179
2007-2008	42494	1	66	0.58	No		2007-2008	1	66	7	Female	Other Hispanic		Never Attended / Kindergarten Only														7992.02
2007-2008	42495	2	67	4.29	Yes	No	2007-2008	2	67	48	Male	Non-Hispanic Black	Divorced	High School Grad/GED or Equivalent		no	46.6667	9	25	100	0	20	30	80	60	5	100	44865.5
2007-2008	42496	2	70	2.5	No	No	2007-2008	2	70	43	Male	Mexican American	Living with partner	High School Grad/GED or Equivalent		no	71.1111	9	80	100	0	70	30	60	100	100	100	8609.21
2007-2008	42497	1	67	1.08	Yes	No	2007-2008	1	67	41	Male	Other Race - Including Multi-Racial	Divorced	Less Than 9th Grade		no	69.4444	9	25	100	0	70	100	80	100	100	50	18754.2
2007-2008	42498	1	65	2.66	Yes		2007-2008	1	65	2	Male	Mexican American																4290.97
2007-2008	42499	2	61	0.65	Yes		2007-2008	2	61	8	Female	Non-Hispanic White		3rd Grade		no												53742.8
2007-2008	42500	2	66	2.11	Yes		2007-2008	2	66	10	Female	Non-Hispanic Black		3rd Grade														2760.07
2007-2008	42501	1	64	2.19	Yes		2007-2008	1	64	19	Female	Non-Hispanic Black		More than high school														14824
2007-2008	42502	2	66	5	Yes	No	2007-2008	2	66	64	Male	Other Hispanic	Married	Some College or AA degree		no	67.7778	9	80	0	100	100	15	60	100	55	100	14223.2
2007-2008	42503	2	67	5	Yes	No	2007-2008	2	67	39	Male	Mexican American	Married	College Graduate or above		no	81.1111	9	25	100	100	100	70	60	100	75	100	32630.8
2007-2008	42504	2	67	2.5	Yes	No	2007-2008	2	67	63	Male	Non-Hispanic White	Married	9-11th Grade (Includes 12th grade with no diploma)		no
2007-2008	42505	2	60	0.14	Yes		2007-2008	2	60	2	Female	Non-Hispanic White																7096.24
2007-2008	42506	1	73	0.04	No	No	2007-2008	1	73	45	Female	Mexican American	Married	9-11th Grade (Includes 12th grade with no diploma)		no	73.3333	9	0	100	75	40	70	100	100	100	75	20697.9
2007-2008	42507	1	67	0.71	No	No	2007-2008	1	67	31	Female	Non-Hispanic White	Married	9-11th Grade (Includes 12th grade with no diploma)	no	no	58.3333	9	0	100	0	70	70	60	100	100	25	21187.2
2007-2008	42508	2	64	2.42	Yes		2007-2008	2	64	13	Male	Other Race - Including Multi-Racial		7th Grade														31150
2007-2008	42509	2	74	3.63	Yes	No	2007-2008	2	74	39	Male	Mexican American	Married	High School Grad/GED or Equivalent		no	62.2222	9	25	100	55	70	0	60	100	75	75	14792.6
2007-2008	42510	2	61	1.89	Yes	No	2007-2008	2	61	38	Male	Non-Hispanic White	Married	Some College or AA degree		no	50	9	0	60	0	70	30	40	100	50	100	284667
2007-2008	42511	2	63	1.09	Yes		2007-2008	2	63	2	Female	Non-Hispanic White																8618.36
2007-2008	42512	1	68	1.69	Yes		2007-2008	1	68	17	Male	Non-Hispanic Black		10th Grade														23680.1
2007-2008	42513	2	59	1.01	Yes		2007-2008	2	59	9	Female	Non-Hispanic White		1st Grade														74461.1
2007-2008	42514	2	64		Yes		2007-2008	2	64	2	Male	Mexican American																3658.22
2007-2008	42515	1	65	2.1	Yes		2007-2008	1	65	8	Female	Mexican American		1st Grade		no
2007-2008	42516	1	65	4.41	Yes	No	2007-2008	1	65	25	Male	Non-Hispanic White	Never married	Some College or AA degree		no	65	9	25	100	0	100	70	100	40	50	100	46998.9
2007-2008	42517	1	68	5	Yes	No	2007-2008	1	68	60	Female	Non-Hispanic Black	Divorced	College Graduate or above		no	83.3333	9	80	100	75	100	70	100	100	25	100	10323
2007-2008	42518	1	66	1.99	Yes	No	2007-2008	1	66	35	Male	Mexican American	Married	High School Grad/GED or Equivalent		no												18167.2
2007-2008	42519	2	72	2.5	No	No	2007-2008	2	72	62	Male	Mexican American	Married	Less Than 9th Grade		no	69.4444	9	50	80	0	100	100	20	100	75	100	10100
2007-2008	42520	1	71		Yes		2007-2008	1	71	19	Female	Other Hispanic		More than high school														9310.65
2007-2008	42521	2	65	4.29	No	No	2007-2008	2	65	43	Female	Mexican American	Married	College Graduate or above	no	no	80	9	50	60	100	90	70	100	100	100	50	29870.4
2007-2008	42522	1	70	0.7	Yes		2007-2008	1	70	9	Female	Mexican American		3rd Grade														9614.17
2007-2008	42523	2	70	1.07	Yes	No	2007-2008	2	70	40	Female	Non-Hispanic Black	Married	Some College or AA degree	no	no	57.7778	8	50	0	100	40	70	60		100	100	31313.1
2007-2008	42524	1	61	4.67	Yes	No	2007-2008	1	61	64	Male	Non-Hispanic White	Married	High School Grad/GED or Equivalent		no	79.4444	9	50	100	75	100	70	40	100	80	100	45927.5
2007-2008	42525	1	62	0.47	Yes		2007-2008	1	62	19	Male	Other Hispanic		10th Grade														15393.3
2007-2008	42526	2	60	3.41	Yes	No	2007-2008	2	60	65	Male	Non-Hispanic White	Married	Some College or AA degree		no	73.3333	9	0	100	100	100	70	40	100	50	100	102433
2007-2008	42527	2	73		No	No	2007-2008	2	73	53	Female	Other Hispanic	Married	9-11th Grade (Includes 12th grade with no diploma)		no	67.7778	9	80	100	100	90	30	20	60	30	100	5925.81
2007-2008	42528	1	71	2.19	No	No	2007-2008	1	71	41	Female	Non-Hispanic White	Divorced	9-11th Grade (Includes 12th grade with no diploma)	no	no												35047.6
2007-2008	42529	2	62	2.5	Yes	Yes	2007-2008	2	62	71	Male	Non-Hispanic White	Divorced	9-11th Grade (Includes 12th grade with no diploma)		no	55	9	80	0	0	100	15	100	20	80	100	33374.9
2007-2008	42530	2	60	2.32	Yes		2007-2008	2	60	0	Male	Non-Hispanic White																14192.2
2007-2008	42531	1	67	0.98	Yes	No	2007-2008	1	67	63	Female	Non-Hispanic Black	Widowed	College Graduate or above		no	42.2222	8	50	0	75	100		40	40	0	75	8981.18
2007-2008	42532	2	72	2.61	Yes	No	2007-2008	2	72	67	Female	Mexican American	Married	High School Grad/GED or Equivalent		no	70	9	80	100	0	100	70	60	40	80	100	6738.59
2007-2008	42533	1	68	4.65	Yes	No	2007-2008	1	68	66	Female	Non-Hispanic White	Divorced	9-11th Grade (Includes 12th grade with no diploma)		yes	78.3333	9	25	0	100	100	100	100	100	80	100	60328.7
2007-2008	42534	1	61	1.03	Yes		2007-2008	1	61	12	Male	Non-Hispanic White		5th Grade														18781.5
2007-2008	42535	1	60	0	Yes	No	2007-2008	1	60	30	Female	Non-Hispanic Black	Living with partner	9-11th Grade (Includes 12th grade with no diploma)	no	no	48.8889	9	0	40	0	20	100	100	100	30	50	39529.4
2007-2008	42536	2	63	0.52	No	No	2007-2008	2	63	31	Male	Non-Hispanic White	Never married	Some College or AA degree		no	72.7778	9	25	100	0	100	70	60	100	100	100	15599.5
2007-2008	42537	1	59	2.19	Yes	No	2007-2008	1	59	62	Female	Non-Hispanic Black	Married	Some College or AA degree		no	76.1111	9	50	80	100	70	70	60	100	55	100	18025.5
2007-2008	42538	2	61	1.21	Yes		2007-2008	2	61	13	Male	Other Hispanic		7th Grade														10568.9
2007-2008	42539	2	68	5	Yes	No	2007-2008	2	68	50	Male	Non-Hispanic White	Married	College Graduate or above		no												53684.8
2007-2008	42540	1	62	5	Yes		2007-2008	1	62	7	Female	Non-Hispanic Black		1st Grade														8932.03
2007-2008	42541	2	65	3.82	Yes	No	2007-2008	2	65	72	Female	Mexican American	Widowed	Less Than 9th Grade		yes	53.3333	9	80	0	100	100	0	40	30	55	75	11287.7
2007-2008	42542	1	61	1.63	Yes	No	2007-2008	1	61	39	Female	Non-Hispanic Black	Divorced	Some College or AA degree	no	no	37.7778	9	0	0	100	20	15	0	100	80	25	17225.6
2007-2008	42543	1	69	1.96	Yes	No	2007-2008	1	69	45	Male	Non-Hispanic White	Never married	College Graduate or above		no												209683
2007-2008	42544	1	71	2.19	Yes	No	2007-2008	1	71	67	Female	Mexican American	Married	Less Than 9th Grade		no	64.4444	9	25	100	100	70	15	80	60	30	100	6542.81
2007-2008	42545	1	59	3.65	Yes	No	2007-2008	1	59	74	Female	Non-Hispanic White	Married	High School Grad/GED or Equivalent		no	59.4444	9	25	60	100	40	15	40	100	80	75	32456.2
2007-2008	42546	1	67	2.48	Yes	No	2007-2008	1	67	51	Male	Non-Hispanic White	Married	9-11th Grade (Includes 12th grade with no diploma)		no	63.8889	9	50	100	75	70	0	100	100	80	0	43764.1
2007-2008	42547	1	62	2.18	Yes	No	2007-2008	1	62	79	Female	Non-Hispanic White	Widowed	High School Grad/GED or Equivalent		no	79.4444	9	50	100	100	70	100	80	60	55	100	26678
2007-2008	42548	1	65	0.75	No		2007-2008	1	65	8	Female	Non-Hispanic White		2nd Grade		no												28047.6
2007-2008	42549	1	65	0.34	No		2007-2008	1	65	0	Female	Mexican American																7775.81
2007-2008	42550	1	67	4.19	Yes		2007-2008	1	67	18	Female	Non-Hispanic White		11th Grade														55589.6
2007-2008	42551	2	68	4.01	Yes		2007-2008	2	68	2	Male	Non-Hispanic Black
2007-2008	42552	1	64	1.11	Yes		2007-2008	1	64	7	Male	Non-Hispanic Black		1st Grade														11233.4
2007-2008	42553	2	70	0.5	Yes		2007-2008	2	70	7	Female	Non-Hispanic White		Never Attended / Kindergarten Only														31397.7
2007-2008	42554	1	63	5	Yes	No	2007-2008	1	63	20	Female	Non-Hispanic Black	Never married	Some College or AA degree	no	no	58.8889	9	0	0	100	100	15	40	100	75	100	51386.6
2007-2008	42555	1	71	2.62	Yes		2007-2008	1	71	2	Female	Mexican American																7240.87
2007-2008	42556	2	64	1.09	Yes		2007-2008	2	64	12	Female	Non-Hispanic White		5th Grade														16760.4
2007-2008	42557	1	61	1.1	Yes	No	2007-2008	1	61	68	Female	Non-Hispanic White	Married	High School Grad/GED or Equivalent		no	51.6667	9	80	0	100	70	0	80	30	5	100	91615.3
2007-2008	42558	1	70	5	Yes	No	2007-2008	1	70	79	Male	Non-Hispanic White	Married	Some College or AA degree		no	62.7778	9	100	0	75	100	70	20	100	0	100	17919.8
2007-2008	42559	1	67	2.56	No	No	2007-2008	1	67	41	Female	Non-Hispanic White	Married	College Graduate or above	no	no	80.5556	9	50	40	100	100	100	60	100	100	75	56428.2
2007-2008	42560	1	60	1.76	Yes	No	2007-2008	1	60	59	Male	Non-Hispanic White	Never married	Some College or AA degree		no	57.7778	9	25	60	0	70	100	60	100	30	75	48946
2007-2008	42561	2	63	1.03	Yes		2007-2008	2	63	2	Male	Non-Hispanic White
2007-2008	42562	1	71	3.94	Yes		2007-2008	1	71	10	Male	Mexican American		4th Grade														7093.28
2007-2008	42563	2	67	1.08	No	No	2007-2008	2	67	48	Female	Other Race - Including Multi-Racial	Married	9-11th Grade (Includes 12th grade with no diploma)		no												21516.4
2007-2008	42564	1	60	0.87	Yes		2007-2008	1	60	0	Female	Non-Hispanic White																11026.7
2007-2008	42565	2	67	0.68	Yes		2007-2008	2	67	0	Male	Non-Hispanic Black																6374.41
2007-2008	42566	1	63	5	Yes	No	2007-2008	1	63	32	Male	Non-Hispanic White	Married	Some College or AA degree		no	52.2222	9	0	100	50	40	30	0	100	50	100	116131
2007-2008	42567	2	59	4.55	Yes	No	2007-2008	2	59	62	Male	Non-Hispanic White	Married	9-11th Grade (Includes 12th grade with no diploma)		no	68.8889	9	100	0	100	100	30	40	100	50	100	60900.3
2007-2008	42568	2	61	2.12	Yes	No	2007-2008	2	61	42	Male	Other Hispanic	Living with partner	Some College or AA degree		no
2007-2008	42569	2	59	0.93	Yes		2007-2008	2	59	2	Male	Non-Hispanic White																7107.03
2007-2008	42570	1	65	1.45	Yes		2007-2008	1	65	10	Female	Mexican American		4th Grade														3909.18
2007-2008	42571	1	66	1.24	No	No	2007-2008	1	66	24	Female	Mexican American	Never married	High School Grad/GED or Equivalent	no	no	66.6667	9	25	100	80	70	15	100	60	100	50	14034.1
2007-2008	42572	1	67	2.49	Yes		2007-2008	1	67	17	Male	Non-Hispanic White		11th Grade														110964
2007-2008	42573	2	70	1.09	Yes		2007-2008	2	70	7	Female	Mexican American		1st Grade														4469.65
2007-2008	42574	1	68	0.58	Yes		2007-2008	1	68	15	Male	Non-Hispanic Black		8th Grade														43110.6
2007-2008	42575	2	62	3.77	Yes	No	2007-2008	2	62	41	Female	Non-Hispanic White	Married	High School Grad/GED or Equivalent	no	no	68.8889	9	0	100	0	100	70	100	100	100	50	142028
2007-2008	42576	2	67	1.13	No	No	2007-2008	2	67	28	Male	Mexican American	Living with partner	Less Than 9th Grade		no												13009.4
2007-2008	42577	2	74	1.85	Yes	No	2007-2008	2	74	29	Female	Non-Hispanic Black	Married	Some College or AA degree	no	no	48.8889	9	0	100	100	20	15	40	60	5	100	45210.8
2007-2008	42578	1	62	1.28	Yes	No	2007-2008	1	62	69	Female	Non-Hispanic Black	Never married	Less Than 9th Grade		no	71.6667	9	80	80	100	100	30	60	40	55	100	13403.3
2007-2008	42579	2	67	5	Yes		2007-2008	2	67	5	Male	Non-Hispanic Black																14978.6
2007-2008	42580	1	63	2.35	Yes	No	2007-2008	1	63	80	Female	Non-Hispanic White	Widowed	High School Grad/GED or Equivalent		no	62.7778	9	50	0	100	40	100	60	60	55	100	32661.4
2007-2008	42581	1	74		Yes	No	2007-2008	1	74	44	Female	Non-Hispanic Black	Separated	High School Grad/GED or Equivalent	no	no	82.7778	9	0	100	75	100	70	100	100	100	100	35155.8
2007-2008	42582	1	62	2.67	Yes	No	2007-2008	1	62	61	Female	Non-Hispanic White	Divorced	High School Grad/GED or Equivalent		no
2007-2008	42583	1	65	1.45	Yes		2007-2008	1	65	15	Female	Non-Hispanic Black		8th Grade														21987.4
2007-2008	42584	1	61	5	No	No	2007-2008	1	61	48	Male	Non-Hispanic White	Divorced	High School Grad/GED or Equivalent		no	42.7778	9	0	0	75	0	70	60	100	30	50	60969.8
2007-2008	42585	2	64		Yes		2007-2008	2	64	4	Male	Non-Hispanic Black																18693.7
2007-2008	42586	2	62	4.48	Yes	No	2007-2008	2	62	52	Male	Non-Hispanic White	Married	College Graduate or above		no	81.6667	9	100	100	75	70	70	40	100	80	100	127771
2007-2008	42587	1	62		Yes	No	2007-2008	1	62	48	Female	Non-Hispanic White	Married	College Graduate or above		no												42698
2007-2008	42588	2	71	1.97	Yes		2007-2008	2	71	10	Female	Mexican American		4th Grade		no												5524.96
2007-2008	42589	1	73		Yes		2007-2008	1	73	16	Female	Other Hispanic		10th Grade														6030.75
2007-2008	42590	1	71	1.46	Yes	No	2007-2008	1	71	59	Male	Non-Hispanic White	Married	Some College or AA degree		yes	38.8889	9	50	100	0	40	0	40	40	5	75	53352.5
2007-2008	42591	1	72	4.38	Yes	No	2007-2008	1	72	68	Female	Non-Hispanic Black	Divorced	College Graduate or above		no	78.3333	9	80	90	100	100	100	20	60	55	100	8671.71
2007-2008	42592	1	66	2.04	No	No	2007-2008	1	66	53	Female	Mexican American	Married	High School Grad/GED or Equivalent		no	52.7778	9	25	0	0	100	70	20	60	100	100	9469.56
2007-2008	42593	1	74	0.99	Yes		2007-2008	1	74	6	Male	Non-Hispanic White		Never Attended / Kindergarten Only
2007-2008	42594	2	63	4.64	Yes	No	2007-2008	2	63	64	Male	Non-Hispanic White	Married	High School Grad/GED or Equivalent		no	71.1111	9	80	100	75	100	30	40	60	55	100	70202.9
2007-2008	42595	1	67	0.58	Yes		2007-2008	1	67	18	Male	Non-Hispanic White		11th Grade														46198.9
2007-2008	42596	2	72	1.47	No	No	2007-2008	2	72	59	Female	Other Hispanic	Widowed	Less Than 9th Grade		no	62.7778	9	50	0	100	70	30	40	100	75	100	7120.39
2007-2008	42597	1	71	0.72	Yes		2007-2008	1	71	8	Female	Mexican American		1st Grade														11123.7
2007-2008	42598	2	61	1.81	Yes		2007-2008	2	61	13	Male	Other Hispanic		7th Grade														46363.5
2007-2008	42599	2	60	2.14	Yes	No	2007-2008	2	60	67	Female	Non-Hispanic White	Married	High School Grad/GED or Equivalent		no	74.4444	9	25	60	75	100	70	40	100	100	100	65186.5
2007-2008	42600	2	66	0.91	No	No	2007-2008	2	66	44	Female	Other Hispanic	Married	Less Than 9th Grade	no	no	90	9	80	100	100	100	70	60	100	100	100	10470.5
2007-2008	42601	2	66	0.81	Yes		2007-2008	2	66	0	Male	Mexican American																8012.78
2007-2008	42602	1	60	1.16	Yes		2007-2008	1	60	2	Female	Mexican American																4311.47
2007-2008	42603	1	63	3.43	Yes	No	2007-2008	1	63	80	Male	Non-Hispanic White	Widowed	Some College or AA degree		no	52.7778	9	50	0	75	70	30	80	40	30	100	18876.9
2007-2008	42604	2	70	3.57	Yes	No	2007-2008	2	70	43	Female	Non-Hispanic White	Married	College Graduate or above	no	no	73.8889	9	0	100	75	100	70	20	100	100	100	73972.6
2007-2008	42605	1	66	5	Yes	No	2007-2008	1	66	53	Male	Mexican American	Married	College Graduate or above		no	87.7778	9	100	100	100	100	30	60	100	100	100	9521.35
2007-2008	42606	2	69	5	Yes		2007-2008	2	69	7	Female	Other Race - Including Multi-Racial		1st Grade														20554.2
2007-2008	42607	1	64	2.33	Yes	No	2007-2008	1	64	32	Female	Non-Hispanic Black	Divorced	Some College or AA degree	no	no												12919.2
2007-2008	42608	2	64	2.36	Yes		2007-2008	2	64	8	Female	Non-Hispanic Black		2nd Grade
2007-2008	42609	2	66	4.1	Yes	No	2007-2008	2	66	33	Male	Non-Hispanic Black	Married	9-11th Grade (Includes 12th grade with no diploma)		no												30844.6
2007-2008	42610	1	63	2.52	Yes		2007-2008	1	63	0	Male	Non-Hispanic White																13390.8
2007-2008	42611	2	62	0.47	Yes		2007-2008	2	62	3	Female	Other Hispanic																7651.23
2007-2008	42612	2	68	1.25	No	No	2007-2008	2	68	36	Male	Other Hispanic	Never married	Less Than 9th Grade		no	81.1111	9	25	100	100	100	70	60	100	75	100	27482
2007-2008	42613	1	66	5	No	No	2007-2008	1	66	52	Male	Mexican American	Married	Less Than 9th Grade		no												32589.6
2007-2008	42614	1	68	0.58	Yes		2007-2008	1	68	19	Male	Non-Hispanic Black		12th Grade, No Diploma														7518.97
2007-2008	42615	2	72	2.42	Yes		2007-2008	2	72	0	Female	Mexican American																3883.95
2007-2008	42616	1	67	1.16	Yes		2007-2008	1	67	1	Female	Non-Hispanic White																30996.1
2007-2008	42617	2	67	3.21	Yes	Yes	2007-2008	2	67	71	Male	Other Race - Including Multi-Racial	Married	College Graduate or above		no	77.7778	9	50	100	100	100	100	40	60	75	75	32680.4
2007-2008	42618	1	65	2.8	Yes		2007-2008	1	65	3	Female	Non-Hispanic White																62587.5
2007-2008	42619	2	66	0.63	Yes		2007-2008	2	66	0	Male	Mexican American																3000.98
2007-2008	42620	1	62	5	Yes		2007-2008	1	62	1	Female	Other Hispanic																3718.18
2007-2008	42621	1	67	0.71	Yes	No	2007-2008	1	67	54	Male	Non-Hispanic White	Married	High School Grad/GED or Equivalent		yes	70	9	80	100	100	70	30	100	20	80	50	44586.2
2007-2008	42622	2	71	5	Yes		2007-2008	2	71	9	Male	Mexican American		3rd Grade		no												5374.23
2007-2008	42623	1	68	0.41	Yes		2007-2008	1	68	5	Female	Non-Hispanic Black																8516.14
2007-2008	42624	2	61		Yes		2007-2008	2	61	1	Female	Other Hispanic																5508.97
2007-2008	42625	1	72	0.67	Yes		2007-2008	1	72	10	Male	Non-Hispanic Black		3rd Grade														6011.33
2007-2008	42626	2	68	4.29	Yes	No	2007-2008	2	68	55	Female	Non-Hispanic Black	Married	9-11th Grade (Includes 12th grade with no diploma)		no	55.5556	9	25	40	75	70	0	60	100	80	50	12510.7
2007-2008	42627	1	66	0.94	Yes	No	2007-2008	1	66	80	Male	Mexican American	Never married	Less Than 9th Grade		no												9517.04
2007-2008	42628	1	69	5	Yes	No	2007-2008	1	69	41	Male	Non-Hispanic White	Married	College Graduate or above		no	90	9	80	100	100	100	70	60	100	100	100	71668.6
2007-2008	42629	1	66	1.02	No	No	2007-2008	1	66	60	Female	Mexican American	Separated	Less Than 9th Grade		no	49.4444	9	80	0	100	70	15	60	40	55	25	5281.43
2007-2008	42630	2	61	0.6	No		2007-2008	2	61	11	Female	Mexican American		5th Grade														22823
2007-2008	42631	2	71	0.48	Yes		2007-2008	2	71	0	Female	Non-Hispanic Black																14930.3
2007-2008	42632	1	60	5	Yes	No	2007-2008	1	60	65	Female	Non-Hispanic White	Married	Some College or AA degree		no	72.7778	9	80	100	100	100	70	40	60	5	100	72013.9
2007-2008	42633	2	64		No		2007-2008	2	64	10	Male	Mexican American		4th Grade														4813.42
2007-2008	42634	1	68	0.32	No	No	2007-2008	1	68	22	Female	Non-Hispanic Black	Never married	High School Grad/GED or Equivalent	no	no	67.7778	9	25	100	0	40	70	100	100	100	75	15450.5
2007-2008	42635	1	74	0.3	Yes		2007-2008	1	74	4	Female	Non-Hispanic Black																20884.9
2007-2008	42636	2	71	5	Yes	No	2007-2008	2	71	55	Male	Other Hispanic	Married	Some College or AA degree		no	53.3333	9	25	0	100	70	30	40	60	55	100	14484.1
2007-2008	42637	1	63	5	Yes		2007-2008	1	63	17	Male	Mexican American		10th Grade		no												33304.7
2007-2008	42638	1	74	1.16	Yes	No	2007-2008	1	74	48	Female	Non-Hispanic Black	Never married	High School Grad/GED or Equivalent		yes
2007-2008	42639	1	61	5	Yes	No	2007-2008	1	61	64	Male	Non-Hispanic White	Divorced	High School Grad/GED or Equivalent		yes	48.3333	9	50	0	0	70	30	60	100	25	100	44804.9
2007-2008	42640	1	60	1.57	Yes	Yes	2007-2008	1	60	79	Female	Non-Hispanic White	Widowed	Some College or AA degree		no	80	9	80	0	100	90	70	100	100	80	100	54377.5
2007-2008	42641	1	61	2.59	Yes		2007-2008	1	61	16	Male	Non-Hispanic White		10th Grade														39158.1
2007-2008	42642	2	67	1.64	Yes	No	2007-2008	2	67	58	Female	Non-Hispanic White	Divorced	Some College or AA degree		no												53094.2
2007-2008	42643	2	61	4.81	Yes	No	2007-2008	2	61	31	Female	Non-Hispanic White	Never married	College Graduate or above	no	no												184424
2007-2008	42644	1	67	0.02	Yes		2007-2008	1	67	1	Male	Non-Hispanic White																12510.9
2007-2008	42645	1	68	2.28	No		2007-2008	1	68	17	Male	Other Hispanic		10th Grade														7736.12
2007-2008	42646	1	74	1.36	Yes	No	2007-2008	1	74	30	Female	Mexican American	Married	High School Grad/GED or Equivalent	yes	no												44998
2007-2008	42647	2	65	5	Yes	No	2007-2008	2	65	48	Male	Mexican American	Living with partner	Some College or AA degree		no	77.2222	9	25	60	100	100	70	40	100	100	100	52692.9
2007-2008	42648	1	60	0.58	Yes	No	2007-2008	1	60	44	Male	Non-Hispanic White	Married	9-11th Grade (Includes 12th grade with no diploma)		no	87.7778	9	50	100	100	100	100	40	100	100	100	135573
2007-2008	42649	1	65	1.24	Yes	No	2007-2008	1	65	49	Female	Non-Hispanic Black	Divorced	Some College or AA degree		yes	38.8889	9	25	0	50	70	0	20	30	55	100	22717.5
2007-2008	42650	1	65	5	Yes	No	2007-2008	1	65	34	Male	Non-Hispanic White	Married	College Graduate or above		no
2007-2008	42651	1	60	1.18	Yes	No	2007-2008	1	60	76	Male	Non-Hispanic White	Widowed	High School Grad/GED or Equivalent		no	53.8889	9	50	0	75	40	30	40	100	75	75	11152.7
2007-2008	42652	2	67	3.92	No	No	2007-2008	2	67	49	Male	Non-Hispanic White	Married	9-11th Grade (Includes 12th grade with no diploma)		no	63.3333	9	0	100	55	100	30	60	100	25	100	63437.2
2007-2008	42653	1	65	0.87	Yes		2007-2008	1	65	0	Female	Non-Hispanic Black
2007-2008	42654	2	72	0.7	No	No	2007-2008	2	72	25	Female	Mexican American	Never married	9-11th Grade (Includes 12th grade with no diploma)	no	no	75.5556	9	25	100	80	100	100	40	60	100	75	10610.5
2007-2008	42655	2	64	1.42	Yes	No	2007-2008	2	64	29	Male	Non-Hispanic White	Separated	9-11th Grade (Includes 12th grade with no diploma)		no												23550.9
2007-2008	42656	2	71	5	Yes	No	2007-2008	2	71	55	Female	Mexican American	Married	High School Grad/GED or Equivalent		no	69.4444	9	50	100	100	70	15	100	60	30	100	14587.6
2007-2008	42657	1	72	4.08	Yes	No	2007-2008	1	72	44	Female	Other Hispanic	Divorced	Some College or AA degree	no	no	60.5556	9	50	0	100	40	30	100	100	50	75	11759.9
2007-2008	42658	1	72	1.61	Yes	No	2007-2008	1	72	60	Female	Other Hispanic	Separated	College Graduate or above		no	66.6667	9	50	100	75	40	70	40	100	100	25	6178.45
2007-2008	42659	1	69	1.94	No	No	2007-2008	1	69	40	Male	Mexican American	Living with partner	Less Than 9th Grade		no	82.2222	9	80	100	100	100	70	40	100	100	50	13483.7
2007-2008	42660	1	70		No	No	2007-2008	1	70	29	Female	Mexican American	Living with partner	High School Grad/GED or Equivalent	no	no	73.3333	9	50	0	100	100	70	40	100	100	100	7733.01
2007-2008	42661	1	61	0.94	Yes		2007-2008	1	61	19	Female	Non-Hispanic White		11th Grade
2007-2008	42662	2	69	0.78	No		2007-2008	2	69	4	Female	Non-Hispanic White																33158.5
2007-2008	42663	2	61	0.68	No		2007-2008	2	61	8	Male	Other Hispanic		1st Grade														25292.2
2007-2008	42664	1	68	1.55	Yes	No	2007-2008	1	68	53	Male	Non-Hispanic Black	Married	Some College or AA degree		no	72.2222	9	50	100	0	70	100	100	100	30	100	12109.9
2007-2008	42665	2	60	1.43	Yes	No	2007-2008	2	60	75	Female	Non-Hispanic White	Married	Less Than 9th Grade		no	49.4444	8	50	0	100	100	30	60	30		75	31387.9
2007-2008	42666	2	72	0.69	Yes	Yes	2007-2008	2	72	78	Male	Non-Hispanic Black	Widowed	9-11th Grade (Includes 12th grade with no diploma)		no	47.7778	9	50	0	75	40	15	80	40	30	100	9172.78
2007-2008	42667	1	73	1.14	Yes		2007-2008	1	73	0	Female	Mexican American																7389.2
2007-2008	42668	2	63	5	Yes	No	2007-2008	2	63	65	Female	Non-Hispanic White	Married	High School Grad/GED or Equivalent		no	75	9	25	100	100	100	100	20	100	30	100	60314.7
2007-2008	42669	2	59	5	Yes		2007-2008	2	59	2	Male	Non-Hispanic White																60039
2007-2008	42670	1	63	2.92	Yes	No	2007-2008	1	63	62	Female	Non-Hispanic White	Married	High School Grad/GED or Equivalent		no	67.7778	9	80	100	0	100	70	100	60	0	100	74368.7
2007-2008	42671	1	59	5	Yes		2007-2008	1	59	7	Female	Non-Hispanic White		1st Grade														23294.8
2007-2008	42672	2	60	1.45	Yes	No	2007-2008	2	60	64	Female	Non-Hispanic Black	Widowed	9-11th Grade (Includes 12th grade with no diploma)		no	56.6667	9	0	0	55	70	100	100	60	25	100	8772.94
2007-2008	42673	2	67	3.86	Yes	No	2007-2008	2	67	65	Female	Non-Hispanic Black	Married	9-11th Grade (Includes 12th grade with no diploma)		no	48.3333	7	25	0	100	40	70		100		100	19618.8
2007-2008	42674	1	65	4.38	Yes	Yes	2007-2008	1	65	80	Male	Non-Hispanic White	Married	College Graduate or above		yes	78.3333	9	100	0	75	100	70	80	100	80	100	18631
2007-2008	42675	1	65	0.83	Yes		2007-2008	1	65	1	Female	Mexican American																4594.29
2007-2008	42676	1	70	5	Yes	No	2007-2008	1	70	38	Female	Non-Hispanic White	Married	College Graduate or above	no	no	72.7778	9	80	100	75	40	70	40	100	50	100	35895.9
2007-2008	42677	1	67	2.9	Yes		2007-2008	1	67	12	Female	Non-Hispanic White		6th Grade														30346.7
2007-2008	42678	1	65	1.08	Yes	No	2007-2008	1	65	50	Female	Other Race - Including Multi-Racial	Married	9-11th Grade (Includes 12th grade with no diploma)		no	54.4444	8	80	0	100	40	70	0		100	100	14039.5
2007-2008	42679	2	61	0.6	Yes	No	2007-2008	2	61	37	Female	Other Hispanic	Married	High School Grad/GED or Equivalent	no	no	27.2222	9	0	0	0	20	0	60	60	55	50	13570.1
2007-2008	42680	1	71	0.7	No	No	2007-2008	1	71	39	Female	Mexican American	Married	9-11th Grade (Includes 12th grade with no diploma)	no	no	73.8889	9	0	100	100	100	70	60	60	75	100	13799.4
2007-2008	42681	2	67	0	Yes	No	2007-2008	2	67	59	Male	Non-Hispanic Black	Divorced	High School Grad/GED or Equivalent		no												37440.7
2007-2008	42682	2	62	2.06	Yes	No	2007-2008	2	62	80	Male	Non-Hispanic White	Married	Less Than 9th Grade		no	71.6667	9	50	100	100	40	70	80	100	5	100	25183.4
2007-2008	42683	1	70	5	Yes	No	2007-2008	1	70	75	Male	Non-Hispanic White	Married	College Graduate or above		no	43.8889	9	25	0	50	90	30	0	100	25	75	20466.9
2007-2008	42684	2	64	0.95	Yes		2007-2008	2	64	16	Male	Non-Hispanic Black		10th Grade														9912.38
2007-2008	42685	2	67	1.54	Yes	No	2007-2008	2	67	23	Male	Non-Hispanic Black	Never married	Some College or AA degree		no	60	9	50	100	0	40	30	20	100	100	100	47389.4
2007-2008	42686	2	66	5	Yes	No	2007-2008	2	66	49	Female	Non-Hispanic White	Married	College Graduate or above		no	62.7778	9	0	100	50	100	30	60	100	50	75	63864.8
2007-2008	42687	1	68	4.8	Yes	No	2007-2008	1	68	46	Female	Non-Hispanic Black	Married	College Graduate or above		no	91.6667	9	25	100	100	100	100	100	100	100	100	41558.3
2007-2008	42688	1	73	1.75	Yes		2007-2008	1	73	17	Female	Non-Hispanic White		11th Grade														17718
2007-2008	42689	2	67	2.15	Yes	No	2007-2008	2	67	39	Female	Non-Hispanic Black	Married	High School Grad/GED or Equivalent	no	no												15044.1
2007-2008	42690	2	60	0.88	Yes		2007-2008	2	60	0	Female	Non-Hispanic White																13100.9
2007-2008	42691	2	63	0.69	Yes		2007-2008	2	63	6	Male	Non-Hispanic White		Never Attended / Kindergarten Only														15597.7
2007-2008	42692	1	65	1.83	No	No	2007-2008	1	65	63	Female	Mexican American	Married	Less Than 9th Grade		no	65.5556	9	0	80	100	40	30	40	100	100	100	11261.5
2007-2008	42693	1	60	5	Yes	Yes	2007-2008	1	60	49	Male	Non-Hispanic White	Married	Some College or AA degree		no	93.3333	9	80	100	100	100	100	60	100	100	100	86490.5
2007-2008	42694	2	62	2.73	Yes		2007-2008	2	62	7	Female	Non-Hispanic White		2nd Grade														19984.3
2007-2008	42695	2	69	5	Yes	No	2007-2008	2	69	50	Male	Other Race - Including Multi-Racial	Married	High School Grad/GED or Equivalent		no												102185
2007-2008	42696	2	61	2.24	Yes	No	2007-2008	2	61	78	Male	Non-Hispanic White	Married	High School Grad/GED or Equivalent		yes	77.2222	9	50	100	75	100	70	80	40	80	100	11687.7
2007-2008	42697	1	62	2.9	Yes		2007-2008	1	62	15	Male	Non-Hispanic Black		9th Grade		no												23314
2007-2008	42698	1	68	3.79	No	No	2007-2008	1	68	57	Female	Other Hispanic	Married	High School Grad/GED or Equivalent		yes												27859
2007-2008	42699	2	63	0.96	Yes	No	2007-2008	2	63	62	Male	Non-Hispanic White	Never married	Less Than 9th Grade		no	58.3333	8	0	100	100	100	15	80		30	100	28811
2007-2008	42700	2	69	1.44	Yes	No	2007-2008	2	69	64	Male	Other Race - Including Multi-Racial	Divorced	College Graduate or above		no	81.6667	9	100	100	100	100	70	40	100	25	100	56531.9
2007-2008	42701	1	68	0.69	Yes	No	2007-2008	1	68	25	Female	Other Hispanic	Never married	College Graduate or above	no	no	91.6667	9	25	100	100	100	100	100	100	100	100	50263.7
2007-2008	42702	1	67	1.1	Yes	No	2007-2008	1	67	70	Female	Non-Hispanic White	Widowed	High School Grad/GED or Equivalent		no	50	9	25	0	0	100	15	80	100	30	100	24926
2007-2008	42703	2	71	2.02	Yes	No	2007-2008	2	71	42	Female	Other Hispanic	Married	Less Than 9th Grade	no	no
2007-2008	42704	1	65	2.18	Yes	No	2007-2008	1	65	45	Male	Mexican American	Married	9-11th Grade (Includes 12th grade with no diploma)		no	77.2222	9	25	0	100	100	70	100	100	100	100	10123.6
2007-2008	42705	1	59	5	Yes	No	2007-2008	1	59	54	Female	Non-Hispanic Black	Married	College Graduate or above		no	53.8889	9	25	60	100	70	0	40	60	30	100	12395.1
2007-2008	42706	2	59	2.71	Yes		2007-2008	2	59	6	Female	Non-Hispanic White		2nd Grade														39323.9
2007-2008	42707	2	65	1.41	Yes		2007-2008	2	65	1	Female	Other Hispanic																19733.3
2007-2008	42708	2	71	5	Yes		2007-2008	2	71	13	Male	Non-Hispanic Black		8th Grade		no												7133.75
2007-2008	42709	1	66	1.1	No		2007-2008	1	66	8	Female	Mexican American		2nd Grade														5876.26
2007-2008	42710	2	71	4.33	Yes	No	2007-2008	2	71	29	Male	Non-Hispanic White	Never married	Some College or AA degree		no	81.1111	9	25	100	100	100	70	60	100	75	100	91483.9
2007-2008	42711	1	72	2.66	Yes		2007-2008	1	72	2	Female	Other Hispanic																6094.99
2007-2008	42712	1	59	5	Yes	No	2007-2008	1	59	63	Female	Non-Hispanic Black	Married	Some College or AA degree		no	87.2222	9	80	100	100	100	70	60	100	75	100	9900.68
2007-2008	42713	1	59	5	Yes	No	2007-2008	1	59	39	Female	Non-Hispanic Black	Married	College Graduate or above	no	no	67.2222	9	25	100	100	70	15	60	60	75	100	47914.2
2007-2008	42714	2	61	1.92	Yes	No	2007-2008	2	61	80	Female	Non-Hispanic White	Widowed	College Graduate or above		no
2007-2008	42715	2	62	5	Yes	No	2007-2008	2	62	51	Male	Non-Hispanic White	Married	College Graduate or above		no	62.7778	9	25	80	75	100	15	20	100	50	100	54387
2007-2008	42716	1	68	3.79	Yes	No	2007-2008	1	68	65	Male	Other Hispanic	Married	9-11th Grade (Includes 12th grade with no diploma)		no
2007-2008	42717	2	60	1.13	No	No	2007-2008	2	60	47	Male	Non-Hispanic White	Married	9-11th Grade (Includes 12th grade with no diploma)		no	41.1111	7	25	0	0	90	100			55	100	22616.5
2007-2008	42718	1	61	0.58	Yes		2007-2008	1	61	5	Male	Non-Hispanic White																8213.99
2007-2008	42719	2	60		Yes		2007-2008	2	60	17	Male	Non-Hispanic White		10th Grade														70300.3
2007-2008	42720	2	64	1.05	Yes		2007-2008	2	64	10	Female	Non-Hispanic Black		3rd Grade														10593.2
2007-2008	42721	2	63	1.25	Yes		2007-2008	2	63	18	Male	Non-Hispanic White		10th Grade														15141.1
2007-2008	42722	1	71	0.5	Yes		2007-2008	1	71	3	Male	Mexican American																10333.5
2007-2008	42723	1	65	1.36	No	No	2007-2008	1	65	24	Male	Mexican American	Married	Less Than 9th Grade		no	87.7778	9	80	100	100	100	70	40	100	100	100	60338.7
2007-2008	42724	1	70	5	Yes	No	2007-2008	1	70	32	Female	Non-Hispanic White	Living with partner	College Graduate or above	no	no	95.5556	9	80	80	100	100	100	100	100	100	100	34880.7
2007-2008	42725	2	61		Yes	No	2007-2008	2	61	35	Female	Non-Hispanic White	Never married	Some College or AA degree	no	no												285116
2007-2008	42726	1	65	0.96	No	No	2007-2008	1	65	32	Female	Mexican American	Married	9-11th Grade (Includes 12th grade with no diploma)	no	no	64.4444	9	0	0	100	100	70	60	100	50	100	15405.4
2007-2008	42727	1	71	1.76	Yes	No	2007-2008	1	71	26	Male	Other Hispanic	Never married	High School Grad/GED or Equivalent		no	66.1111	9	25	90	0	70	100	60	100	75	75	19305.1
2007-2008	42728	2	67	4.84	No	No	2007-2008	2	67	43	Female	Non-Hispanic Black	Married	Some College or AA degree	no	no	46.6667	8	50	0	80	70	0	40		80	100	19295.3
2007-2008	42729	2	74	2.99	Yes		2007-2008	2	74	11	Male	Non-Hispanic White		5th Grade														26298.3
2007-2008	42730	2	73		Yes		2007-2008	2	73	17	Female	Other Hispanic		10th Grade														7133.66
2007-2008	42731	1	65	2.33	No		2007-2008	1	65	6	Male	Mexican American		Never Attended / Kindergarten Only		no												13022.6
2007-2008	42732	1	69	0.5	Yes		2007-2008	1	69	7	Male	Non-Hispanic White		1st Grade														15667.3
2007-2008	42733	2	65	2.83	Yes	No	2007-2008	2	65	68	Male	Non-Hispanic Black	Married	9-11th Grade (Includes 12th grade with no diploma)		no												11700.8
2007-2008	42734	1	65	1.22	Yes		2007-2008	1	65	15	Female	Non-Hispanic White		9th Grade														98270.8
2007-2008	42735	1	69	1.75	Yes		2007-2008	1	69	2	Male	Other Hispanic																5031.6
2007-2008	42736	1	66	1.02	Yes	No	2007-2008	1	66	61	Male	Mexican American	Married	Less Than 9th Grade		no	72.2222	9	80	100	100	100	70	0	100	0	100	6775.54
2007-2008	42737	1	61	1.01	Yes		2007-2008	1	61	14	Female	Non-Hispanic Black		8th Grade														32705.3
2007-2008	42738	1	66	0.73	Yes	No	2007-2008	1	66	75	Male	Mexican American	Divorced	High School Grad/GED or Equivalent		no	80.5556	9	80	100	100	90	100	20	60	75	100	6780.59
2007-2008	42739	2	61	5	Yes		2007-2008	2	61	9	Female	Non-Hispanic White		3rd Grade														28517.6
2007-2008	42740	2	62	2.14	Yes	No	2007-2008	2	62	73	Male	Non-Hispanic White	Married	College Graduate or above		no	69.4444	9	50	100	100	100	70	40	60	5	100	28060.7
2007-2008	42741	2	64	5	Yes	No	2007-2008	2	64	58	Male	Mexican American	Married	Some College or AA degree		yes	75.5556	9	50	100	0	100	100	100	100	30	100	6245.31
2007-2008	42742	2	62	0.71	Yes		2007-2008	2	62	10	Female	Non-Hispanic Black		4th Grade														4754.22
2007-2008	42743	1	62	0.58	No	No	2007-2008	1	62	34	Male	Other Hispanic	Married	9-11th Grade (Includes 12th grade with no diploma)		no	80.5556	9	80	100	100	100	30	40	100	75	100	12913.5
2007-2008	42744	1	71	1.5	Yes	No	2007-2008	1	71	23	Male	Mexican American	Living with partner	9-11th Grade (Includes 12th grade with no diploma)		no	57.7778	9	25	100	0	40	70	60	100	50	75	69283.4
2007-2008	42745	1	66	2.68	No	Yes	2007-2008	1	66	51	Female	Mexican American	Married	College Graduate or above		no	52.7778	9	0	0	100	100	0	80	40	55	100	9420.2
2007-2008	42746	1	60	4.75	Yes	Yes	2007-2008	1	60	69	Female	Non-Hispanic White	Married	College Graduate or above		no	84.4444	9	80	60	100	100	100	40	100	80	100	94202.5
2007-2008	42747	1	73	2.54	Yes		2007-2008	1	73	0	Female	Non-Hispanic Black																18045.9
2007-2008	42748	2	72	1.25	Yes	No	2007-2008	2	72	80	Female	Mexican American	Divorced	Less Than 9th Grade		no
2007-2008	42749	2	60	1.18	Yes	No	2007-2008	2	60	77	Female	Non-Hispanic White	Widowed	High School Grad/GED or Equivalent		no
2007-2008	42750	1	60	1.34	Yes	No	2007-2008	1	60	23	Female	Non-Hispanic White	Never married	High School Grad/GED or Equivalent	no	no												107348
2007-2008	42751	1	67	5	Yes	Yes	2007-2008	1	67	76	Male	Non-Hispanic White	Married	High School Grad/GED or Equivalent		no												21790.4
2007-2008	42752	1	64		Yes	No	2007-2008	1	64	63	Female	Non-Hispanic Black	Widowed	Less Than 9th Grade		no	43.3333	9	50	0	75	100	15	20	0	30	100	9544.78
2007-2008	42753	1	65	4.38	Yes	No	2007-2008	1	65	43	Female	Non-Hispanic Black	Never married	Some College or AA degree	no	no	64.4444	9	0	60	0	100	70	100	100	50	100	14571.2
2007-2008	42754	2	68	5	Yes		2007-2008	2	68	11	Female	Non-Hispanic White		5th Grade
2007-2008	42755	2	62		No		2007-2008	2	62	0	Female	Non-Hispanic White																44622.8
2007-2008	42756	2	66	5	Yes		2007-2008	2	66	12	Female	Non-Hispanic Black		6th Grade														8039.57
2007-2008	42757	2	64		Yes		2007-2008	2	64	1	Female	Non-Hispanic Black																16144.8
2007-2008	42758	1	64	2.04	Yes		2007-2008	1	64	6	Male	Non-Hispanic Black		Never Attended / Kindergarten Only														6212.41
2007-2008	42759	1	70	5	Yes	No	2007-2008	1	70	80	Male	Non-Hispanic White	Widowed	College Graduate or above		no
2007-2008	42760	2	71	2.14	Yes	No	2007-2008	2	71	43	Male	Non-Hispanic White	Living with partner	9-11th Grade (Includes 12th grade with no diploma)		no	70	9	25	100	0	100	70	100	60	75	100	65503.8
2007-2008	42761	1	62	1.36	Yes	No	2007-2008	1	62	62	Male	Other Hispanic	Married	High School Grad/GED or Equivalent		no	78.3333	9	80	100	75	100	15	60	100	100	75	4606.06
2007-2008	42762	2	68	2.45	Yes		2007-2008	2	68	4	Male	Non-Hispanic Black																11205.1
2007-2008	42763	1	67	3.49	Yes	No	2007-2008	1	67	46	Male	Non-Hispanic Black	Living with partner	9-11th Grade (Includes 12th grade with no diploma)		yes	47.7778	9	0	0	0	40	100	40	100	50	100	15377.7
2007-2008	42764	2	64	0.71	Yes	No	2007-2008	2	64	68	Female	Non-Hispanic Black	Divorced	9-11th Grade (Includes 12th grade with no diploma)		no	66.6667	9	0	80	0	40	100	100	100	80	100	18217.6
2007-2008	42765	1	62	5	Yes		2007-2008	1	62	3	Male	Non-Hispanic White																28496.1
2007-2008	42766	1	60	1.5	Yes	No	2007-2008	1	60	51	Male	Non-Hispanic White	Married	College Graduate or above		no	94.4444	9	80	100	100	100	70	100	100	100	100	133614
2007-2008	42767	1	64	2.49	Yes		2007-2008	1	64	17	Male	Non-Hispanic White		11th Grade														102327
2007-2008	42768	2	62	1.92	Yes	No	2007-2008	2	62	80	Male	Non-Hispanic White	Widowed	9-11th Grade (Includes 12th grade with no diploma)		no	61.1111	9	80	0	100	70	0	60	60	80	100	37429.2
2007-2008	42769	2	62	3.27	Yes	Yes	2007-2008	2	62	73	Female	Non-Hispanic White	Widowed	Some College or AA degree		no	51.1111	9	25	60	75	40	70	0	60	30	100	56094.6
2007-2008	42770	1	62	0.65	No	No	2007-2008	1	62	24	Male	Other Hispanic	Never married	High School Grad/GED or Equivalent		no	86.1111	9	25	100	100	100	100	100	100	75	75	11892.4
2007-2008	42771	1	63	1.57	Yes	No	2007-2008	1	63	54	Male	Non-Hispanic Black	Married	9-11th Grade (Includes 12th grade with no diploma)		no	58.3333	9	0	0	0	100	100	100	100	50	75	11141.2
2007-2008	42772	1	64	1.43	Yes	No	2007-2008	1	64	65	Female	Non-Hispanic White	Married	High School Grad/GED or Equivalent		no												21550.7
2007-2008	42773	2	72		No		2007-2008	2	72	2	Male	Mexican American																7010.13
2007-2008	42774	1	62	1.04	Yes		2007-2008	1	62	0	Male	Other Race - Including Multi-Racial																4825.73
2007-2008	42775	1	70	5	Yes		2007-2008	1	70	16	Female	Non-Hispanic White		11th Grade														53092.5
2007-2008	42776	1	64	5	Yes		2007-2008	1	64	14	Male	Non-Hispanic White		8th Grade														46492.1
2007-2008	42777	2	72	0.48	No		2007-2008	2	72	10	Male	Mexican American		3rd Grade		no												11281.8
2007-2008	42778	2	68	5	Yes		2007-2008	2	68	16	Female	Other Race - Including Multi-Racial		10th Grade														7814.96
2007-2008	42779	1	59	1.57	Yes	No	2007-2008	1	59	35	Male	Mexican American	Married	9-11th Grade (Includes 12th grade with no diploma)		no	83.8889	9	50	100	75	100	70	60	100	100	100	14320.9
2007-2008	42780	2	62	1.51	Yes		2007-2008	2	62	0	Female	Non-Hispanic White																10645.5
2007-2008	42781	2	60	4.46	No	No	2007-2008	2	60	39	Male	Non-Hispanic White	Living with partner	Some College or AA degree		no	53.3333	9	0	100	0	100	30	40	60	50	100	68316
2007-2008	42782	2	69	5	Yes	No	2007-2008	2	69	36	Male	Non-Hispanic White	Married	College Graduate or above		no												54946.1
2007-2008	42783	2	68	1.08	Yes		2007-2008	2	68	1	Male	Non-Hispanic Black																5163.38
2007-2008	42784	2	59	0.87	Yes		2007-2008	2	59	11	Male	Non-Hispanic White		4th Grade														45996.2
2007-2008	42785	1	69	1.86	No	No	2007-2008	1	69	22	Female	Other Hispanic	Married	Some College or AA degree	no	no	64.4444	9	50	100	0	70	70	40	100	50	100	59770.9
2007-2008	42786	1	71	0.89	Yes		2007-2008	1	71	0	Female	Mexican American																8967.62
2007-2008	42787	1	71	1.86	Yes	No	2007-2008	1	71	35	Female	Non-Hispanic White	Never married	Some College or AA degree	no	no	83.8889	9	25	100	100	100	70	60	100	100	100	99826.9
2007-2008	42788	1	70	5	Yes	Yes	2007-2008	1	70	71	Female	Non-Hispanic White	Married	College Graduate or above		no	65	8	25	100	75	100	30	100		55	100	26736
2007-2008	42789	1	61	0.34	Yes		2007-2008	1	61	11	Male	Non-Hispanic White		5th Grade		no												38506.4
2007-2008	42790	2	59	1.44	No	No	2007-2008	2	59	32	Male	Non-Hispanic White	Divorced	9-11th Grade (Includes 12th grade with no diploma)		no	66.6667	9	0	100	0	40	100	60	100	100	100	142544
2007-2008	42791	2	69	2.84	Yes	No	2007-2008	2	69	60	Male	Other Hispanic	Married	Some College or AA degree		no
2007-2008	42792	2	64		Yes	No	2007-2008	2	64	66	Male	Non-Hispanic White	Married	High School Grad/GED or Equivalent		no	78.3333	9	50	100	75	100	70	80	100	30	100	44470.3
2007-2008	42793	2	65	5	Yes		2007-2008	2	65	8	Female	Non-Hispanic White		2nd Grade														147352
2007-2008	42794	2	66	5	No	No	2007-2008	2	66	26	Male	Non-Hispanic White	Never married	High School Grad/GED or Equivalent		no	64.4444	8	50	60	0	70	100	100	100		100	208534
2007-2008	42795	1	59	1.08	Yes	No	2007-2008	1	59	76	Female	Non-Hispanic Black	Widowed	High School Grad/GED or Equivalent		no	50.5556	7	50	0	100	100	100			5	100	11810.2
2007-2008	42796	2	63	1.81	Yes		2007-2008	2	63	10	Female	Mexican American		4th Grade														28419.9
2007-2008	42797	2	60	1.61	Yes	No	2007-2008	2	60	35	Female	Non-Hispanic White	Married	College Graduate or above	no	no	87.7778	9	50	100	100	70	70	100	100	100	100	62005.1
2007-2008	42798	1	61	0.97	No		2007-2008	1	61	19	Male	Non-Hispanic White		12th Grade, No Diploma														12066.6
2007-2008	42799	2	64	0.69	No	No	2007-2008	2	64	63	Male	Mexican American	Married	Less Than 9th Grade		no	78.3333	9	50	100	75	70	70	60	100	80	100	9182.55
2007-2008	42800	1	66		Yes		2007-2008	1	66	3	Male	Mexican American																7872.81
2007-2008	42801	2	63	2.14	Yes	No	2007-2008	2	63	50	Female	Non-Hispanic White	Married	High School Grad/GED or Equivalent		no	49.4444	9	25	0	0	40	70	60	100	50	100	65106.1
2007-2008	42802	2	70	4.55	Yes	No	2007-2008	2	70	62	Male	Mexican American	Married	High School Grad/GED or Equivalent		no	71.1111	9	0	100	100	70	15	100	100	55	100	6271.53
2007-2008	42803	2	65	1.95	Yes		2007-2008	2	65	3	Female	Other Hispanic																12866.3
2007-2008	42804	2	62	3.07	Yes		2007-2008	2	62	19	Female	Non-Hispanic White		More than high school														180515
2007-2008	42805	1	65	1.81	Yes		2007-2008	1	65	1	Female	Mexican American																11070.5
2007-2008	42806	1	60	4.38	Yes	No	2007-2008	1	60	36	Female	Other Hispanic	Married	Some College or AA degree	no	no	78.3333	9	25	100	100	100	70	60	100	50	100	9867.44
2007-2008	42807	2	66	0.67	No		2007-2008	2	66	16	Male	Mexican American		10th Grade														25306.9
2007-2008	42808	1	70	1.75	Yes	No	2007-2008	1	70	58	Female	Mexican American	Living with partner	Less Than 9th Grade		no
2007-2008	42809	2	69	1.73	No	No	2007-2008	2	69	27	Male	Mexican American	Married	Less Than 9th Grade		no												43191.8
2007-2008	42810	2	59	0.66	Yes		2007-2008	2	59	8	Male	Non-Hispanic White		1st Grade														67141.9
2007-2008	42811	1	68	3.92	Yes	No	2007-2008	1	68	27	Male	Non-Hispanic White	Living with partner	College Graduate or above		no												54200.1
2007-2008	42812	2	62	1.65	Yes		2007-2008	2	62	5	Male	Non-Hispanic White																40014.3
2007-2008	42813	2	62	1.79	Yes	No	2007-2008	2	62	80	Male	Non-Hispanic White	Married	Some College or AA degree		no	83.3333	9	50	100	100	70	100	100	100	30	100	12652.1
2007-2008	42814	1	68	2.07	Yes	Yes	2007-2008	1	68	80	Female	Non-Hispanic Black	Widowed	High School Grad/GED or Equivalent		no	50	9	0	0	100	20	30	100	100	0	100	8972.3
2007-2008	42815	2	63	1.37	Yes		2007-2008	2	63	9	Female	Non-Hispanic Black		3rd Grade														18143
2007-2008	42816	1	64	0.84	No	No	2007-2008	1	64	31	Female	Non-Hispanic White	Married	High School Grad/GED or Equivalent	no	no	56.1111	9	0	100	0	0	70	60	100	100	75	91683.5
2007-2008	42817	2	71	3.71	Yes	No	2007-2008	2	71	51	Male	Mexican American	Married	High School Grad/GED or Equivalent		no	53.8889	9	50	0	75	70	70	60	30	30	100	29005.1
2007-2008	42818	1	60		Yes	No	2007-2008	1	60	77	Female	Non-Hispanic White	Widowed	Less Than 9th Grade		no												16433.4
2007-2008	42819	1	66	0.4	No		2007-2008	1	66	3	Female	Mexican American																11443.5
2007-2008	42820	2	71	1.86	Yes	Yes	2007-2008	2	71	68	Male	Non-Hispanic White	Married	9-11th Grade (Includes 12th grade with no diploma)		no	87.2222	9	80	100	75	100	100	80	100	50	100	54970.2
2007-2008	42821	1	70	2.9	Yes		2007-2008	1	70	2	Female	Other Race - Including Multi-Racial																32886.7
2007-2008	42822	1	64	0.77	Yes	No	2007-2008	1	64	39	Male	Non-Hispanic White	Married	Some College or AA degree		yes	71.6667	9	50	100	75	100	30	40	100	100	50	15437.6
2007-2008	42823	2	62		Yes	No	2007-2008	2	62	49	Male	Other Hispanic	Divorced	Less Than 9th Grade		no	67.7778	9	80	0	0	100	70	60	100	100	100	40368.5
2007-2008	42824	2	70	2.82	Yes	No	2007-2008	2	70	29	Female	Mexican American	Married	High School Grad/GED or Equivalent	no	no	93.3333	9	80	90	100	100	70	100	100	100	100	28598.6
2007-2008	42825	2	62	2.71	No	No	2007-2008	2	62	61	Male	Non-Hispanic White	Married	High School Grad/GED or Equivalent		no	59.4444	9	25	100	75	100	70	0	60	5	100	57410.2
2007-2008	42826	1	68	0.17	Yes	No	2007-2008	1	68	47	Female	Non-Hispanic Black	Never married	9-11th Grade (Includes 12th grade with no diploma)		no												41558.3
2007-2008	42827	2	70	5	Yes	Yes	2007-2008	2	70	69	Female	Mexican American	Married	Some College or AA degree		no	85	9	80	100	100	100	70	40	100	75	100	16083.9
2007-2008	42828	2	60	1.13	Yes		2007-2008	2	60	5	Male	Non-Hispanic White																21264.2
2007-2008	42829	2	61	2.19	Yes		2007-2008	2	61	9	Male	Non-Hispanic Black		2nd Grade														7475.32
2007-2008	42830	1	68	1.69	Yes	No	2007-2008	1	68	65	Female	Non-Hispanic Black	Widowed	9-11th Grade (Includes 12th grade with no diploma)		no	37.2222	8	25	0	55	100	15	20	20		100	20602.4
2007-2008	42831	1	59	0.5	Yes		2007-2008	1	59	0	Female	Mexican American
2007-2008	42832	2	69	5	Yes		2007-2008	2	69	15	Male	Other Race - Including Multi-Racial		9th Grade														42355.1
2007-2008	42833	2	63	3.85	Yes	No	2007-2008	2	63	65	Female	Non-Hispanic White	Widowed	Some College or AA degree		no	62.2222	9	0	100	100	100	30	20	60	50	100	72215.9
2007-2008	42834	2	63	4.83	Yes	No	2007-2008	2	63	45	Male	Non-Hispanic White	Married	College Graduate or above		no	66.6667	9	25	40	100	70	15	100	100	50	100	223324
2007-2008	42835	2	59	2.31	Yes	No	2007-2008	2	59	64	Male	Non-Hispanic White	Widowed	Less Than 9th Grade		yes	84.4444	9	80	100	75	100	70	80	100	55	100	51388.6
2007-2008	42836	1	68	1.61	Yes		2007-2008	1	68	3	Male	Non-Hispanic Black																18766.8
2007-2008	42837	1	69	0.92	No		2007-2008	1	69	13	Male	Mexican American		6th Grade														6381.43
2007-2008	42838	2	59	1.29	Yes	Yes	2007-2008	2	59	54	Female	Other Race - Including Multi-Racial	Married	High School Grad/GED or Equivalent		no	54.4444	9	80	60	0	70	30	40	60	75	75	50301.5
2007-2008	42839	1	64		Yes	No	2007-2008	1	64	29	Female	Non-Hispanic Black	Never married	College Graduate or above	no	no	73.8889	9	0	100	100	100	70	40	100	55	100	42499.8
2007-2008	42840	1	60	1.75	No	No	2007-2008	1	60	45	Female	Other Hispanic	Married	College Graduate or above		no	65.5556	9	50	100	0	100	30	60	100	100	50	19845.7
2007-2008	42841	1	72	0.73	Yes		2007-2008	1	72	5	Male	Other Hispanic
2007-2008	42842	2	69	1.14	No	No	2007-2008	2	69	25	Male	Mexican American	Married	9-11th Grade (Includes 12th grade with no diploma)		no	45.5556	8	25	40	25	70	15	60		75	100	10384.4
2007-2008	42843	1	61	1.41	Yes	No	2007-2008	1	61	56	Male	Non-Hispanic Black	Never married	9-11th Grade (Includes 12th grade with no diploma)		no	46.1111	9	0	60	0	40	70	60	60	25	100	16622.7
2007-2008	42844	1	60	5	Yes	No	2007-2008	1	60	63	Female	Non-Hispanic White	Married	Some College or AA degree		no	79.4444	9	80	100	75	70	70	40	100	80	100	58781.7
2007-2008	42845	2	61		Yes	Yes	2007-2008	2	61	80	Female	Non-Hispanic White	Widowed	High School Grad/GED or Equivalent		no	52.2222	9	25	20	100	70	15	80	30	30	100	54086.2
2007-2008	42846	1	64	2.91	Yes	No	2007-2008	1	64	32	Female	Non-Hispanic Black	Married	Some College or AA degree	no	no	70.5556	9	25	100	100	40	70	40	60	100	100	36924.7
2007-2008	42847	1	62	0.71	No	No	2007-2008	1	62	22	Male	Other Hispanic	Married	9-11th Grade (Includes 12th grade with no diploma)		no												12331.6
2007-2008	42848	1	67	0.9	No		2007-2008	1	67	0	Male	Non-Hispanic White																6891.06
2007-2008	42849	1	63	1.3	Yes		2007-2008	1	63	1	Male	Other Race - Including Multi-Racial																17493.4
2007-2008	42850	2	59	4.5	Yes	No	2007-2008	2	59	53	Male	Non-Hispanic White	Married	9-11th Grade (Includes 12th grade with no diploma)		yes	68.8889	9	80	100	0	70	70	80	40	80	100	16859.5
2007-2008	42851	1	67	0.54	Yes		2007-2008	1	67	0	Female	Non-Hispanic White																9092
2007-2008	42852	1	66	0.58	No		2007-2008	1	66	4	Male	Mexican American																11843.9
2007-2008	42853	2	72	4.48	No	No	2007-2008	2	72	39	Male	Non-Hispanic Black	Married	Some College or AA degree		no												15331.9
2007-2008	42854	1	74	3.58	No		2007-2008	1	74	16	Female	Non-Hispanic Black		9th Grade														46698.6
2007-2008	42855	1	63	5	Yes	No	2007-2008	1	63	36	Female	Other Race - Including Multi-Racial	Married	College Graduate or above	yes	no	70	8	80	60	100	100	70	20		100	100	44723.6
2007-2008	42856	1	64	0.23	Yes		2007-2008	1	64	16	Female	Non-Hispanic Black		10th Grade														6890.5
2007-2008	42857	2	72	0.61	No	No	2007-2008	2	72	28	Male	Mexican American	Married	9-11th Grade (Includes 12th grade with no diploma)		no
2007-2008	42858	1	68	0.83	Yes		2007-2008	1	68	9	Male	Non-Hispanic Black		3rd Grade
2007-2008	42859	2	61	5	Yes		2007-2008	2	61	11	Female	Non-Hispanic White		4th Grade														82911.8
2007-2008	42860	1	66	0.59	Yes		2007-2008	1	66	19	Female	Mexican American		More than high school														30704.1
2007-2008	42861	2	62		No		2007-2008	2	62	18	Female	Non-Hispanic White		Less Than 9th Grade														107675
2007-2008	42862	2	71		Yes	No	2007-2008	2	71	21	Female	Non-Hispanic Black	Never married	Some College or AA degree	no	no	77.7778	9	0	0	100	100	100	100	100	100	100	19429.5
2007-2008	42863	2	63	1.86	Yes		2007-2008	2	63	8	Male	Non-Hispanic White		2nd Grade														28329.1
2007-2008	42864	1	61	0.58	Yes		2007-2008	1	61	0	Female	Non-Hispanic Black																9042.75
2007-2008	42865	1	72	1.66	No	No	2007-2008	1	72	23	Female	Non-Hispanic Black	Married	High School Grad/GED or Equivalent	no	no	61.1111	9	50	0	100	100	15	100	60	75	50	14669.2
2007-2008	42866	2	63	2.14	Yes	No	2007-2008	2	63	80	Female	Non-Hispanic White	Married	9-11th Grade (Includes 12th grade with no diploma)		no	63.8889	9	50	100	100	100	15	20	60	55	75	32213.3
2007-2008	42867	1	73	3.41	Yes	No	2007-2008	1	73	68	Male	Non-Hispanic Black	Never married	Some College or AA degree		no	55	9	25	0	0	100	70	20	100	80	100	5494.57
2007-2008	42868	1	63	3.78	Yes	No	2007-2008	1	63	43	Male	Non-Hispanic White	Married	College Graduate or above		no	52.7778	9	50	0	100	70	0	40	60	55	100	174647
2007-2008	42869	1	67	1.18	Yes	Yes	2007-2008	1	67	64	Female	Non-Hispanic White	Widowed	High School Grad/GED or Equivalent		no	43.8889	9	0	0	0	70	70	20	60	75	100	22418.1
2007-2008	42870	1	66	1.16	No	No	2007-2008	1	66	34	Female	Mexican American	Divorced	College Graduate or above	no	no												54131.9
2007-2008	42871	2	60	4.43	Yes		2007-2008	2	60	3	Female	Non-Hispanic White																43602.1
2007-2008	42872	2	60	0.57	Yes		2007-2008	2	60	2	Male	Non-Hispanic White																14877.7
2007-2008	42873	1	62	0.61	Yes	No	2007-2008	1	62	80	Female	Other Race - Including Multi-Racial	Married	Less Than 9th Grade		no												20186
2007-2008	42874	2	63	0.66	Yes		2007-2008	2	63	1	Male	Other Hispanic																17281.2
2007-2008	42875	1	65	3.87	Yes		2007-2008	1	65	13	Female	Non-Hispanic Black		7th Grade														64192.3
2007-2008	42876	1	61		Yes	Yes	2007-2008	1	61	80	Female	Non-Hispanic White	Never married	High School Grad/GED or Equivalent		no	82.7778	9	25	100	100	100	70	100	100	50	100	41953.1
2007-2008	42877	1	64	2.59	Yes	No	2007-2008	1	64	22	Male	Non-Hispanic White	Never married	Some College or AA degree		no												54183.3
2007-2008	42878	2	59	0.68	Yes	No	2007-2008	2	59	45	Male	Non-Hispanic White	Married	Less Than 9th Grade		no												21364.6
2007-2008	42879	2	74	1.27	Yes		2007-2008	2	74	5	Female	Non-Hispanic Black																8048.6
2007-2008	42880	1	60	2.91	Yes	No	2007-2008	1	60	28	Female	Non-Hispanic White	Married	Some College or AA degree	no	no	86.1111	9	25	100	75	100	100	100	100	75	100	38486.6
2007-2008	42881	1	62	0	Yes		2007-2008	1	62	17	Female	Other Hispanic		10th Grade														4654.52
2007-2008	42882	1	64	0.24	Yes		2007-2008	1	64	2	Male	Non-Hispanic White
2007-2008	42883	2	65	3.87	Yes		2007-2008	2	65	0	Male	Other Race - Including Multi-Racial																22750.9
2007-2008	42884	2	65	4.23	Yes		2007-2008	2	65	13	Female	Mexican American		7th Grade														34541.3
2007-2008	42885	1	60	2.69	Yes		2007-2008	1	60	11	Female	Other Hispanic		5th Grade														8355.55
2007-2008	42886	2	65	5	Yes		2007-2008	2	65	4	Male	Non-Hispanic White																127092
2007-2008	42887	2	72	1.65	Yes		2007-2008	2	72	9	Female	Mexican American		3rd Grade														6550.5
2007-2008	42888	2	70	1.81	No		2007-2008	2	70	3	Female	Mexican American
2007-2008	42889	1	59	1.01	Yes		2007-2008	1	59	13	Female	Non-Hispanic White		6th Grade														12263.8
2007-2008	42890	1	71	2.33	No	No	2007-2008	1	71	35	Male	Mexican American	Married	Some College or AA degree		no	73.3333	9	0	100	100	100	70	40	100	50	100	21737.6
2007-2008	42891	2	65		Yes		2007-2008	2	65	4	Male	Other Hispanic																8710.02
2007-2008	42892	2	62	1.65	Yes		2007-2008	2	62	3	Male	Other Hispanic																8459.59
2007-2008	42893	2	65	4.64	Yes		2007-2008	2	65	0	Female	Non-Hispanic Black																6937.47
2007-2008	42894	1	71	1.36	Yes	No	2007-2008	1	71	37	Male	Mexican American	Married	Less Than 9th Grade		no
2007-2008	42895	2	71	1.45	Yes		2007-2008	2	71	8	Female	Mexican American		2nd Grade														26917.2
2007-2008	42896	1	70	1	No	No	2007-2008	1	70	26	Female	Mexican American	Living with partner	High School Grad/GED or Equivalent	no	no	81.6667	9	25	100	100	100	70	40	100	100	100	14045.4
2007-2008	42897	2	59	0.03	No	No	2007-2008	2	59	32	Female	Non-Hispanic White	Living with partner	9-11th Grade (Includes 12th grade with no diploma)	no	no	62.7778	9	25	100	55	20	15	100	100	75	75	50425.6
2007-2008	42898	1	68	5	No	No	2007-2008	1	68	63	Female	Non-Hispanic Black	Divorced	High School Grad/GED or Equivalent		no	63.3333	9	80	60	0	100	30	80	40	80	100	7445.65
2007-2008	42899	1	71	1.64	Yes		2007-2008	1	71	0	Male	Mexican American																2814.97
2007-2008	42900	1	59	5	Yes	No	2007-2008	1	59	63	Male	Non-Hispanic Black	Married	College Graduate or above		no	52.7778	9	0	100	100	70	15	20	40	30	100	4868.51
2007-2008	42901	1	59	3.92	Yes	No	2007-2008	1	59	33	Male	Non-Hispanic Black	Married	Some College or AA degree		no												10668.4
2007-2008	42902	1	65	0.8	Yes	No	2007-2008	1	65	31	Female	Mexican American	Living with partner	9-11th Grade (Includes 12th grade with no diploma)	no	no	55	9	25	0	80	100	0	40	100	100	50	32744.1
2007-2008	42903	2	62	1.54	No	No	2007-2008	2	62	22	Female	Non-Hispanic White	Living with partner	Some College or AA degree	no	no												146238
2007-2008	42904	2	66	2.14	Yes	No	2007-2008	2	66	47	Female	Mexican American	Separated	9-11th Grade (Includes 12th grade with no diploma)		no	76.6667	9	25	100	100	100	100	60	30	100	75	12237.8
2007-2008	42905	1	70	0.49	Yes	No	2007-2008	1	70	30	Male	Other Hispanic	Living with partner	Some College or AA degree		no												24323.1
2007-2008	42906	2	66	4.57	Yes	No	2007-2008	2	66	56	Male	Non-Hispanic White	Married	Some College or AA degree		no	49.4444	9	0	0	30	70	70	0	100	75	100	187883
2007-2008	42907	1	67	0.91	Yes		2007-2008	1	67	8	Male	Non-Hispanic White		2nd Grade														27010.3
2007-2008	42908	2	60	1.73	Yes	Yes	2007-2008	2	60	80	Female	Non-Hispanic White	Widowed	Some College or AA degree		no	71.6667	9	25	100	100	100	70	40	60	50	100	30401.8
2007-2008	42909	1	64	1.09	Yes		2007-2008	1	64	13	Male	Non-Hispanic White		6th Grade
2007-2008	42910	2	61	2.62	Yes		2007-2008	2	61	0	Male	Mexican American
2007-2008	42911	1	71	1.45	Yes	No	2007-2008	1	71	38	Male	Non-Hispanic White	Living with partner	9-11th Grade (Includes 12th grade with no diploma)		no	58.3333	9	50	100	0	0	100	0	100	100	75	16991.7
2007-2008	42912	1	72	1.69	Yes	No	2007-2008	1	72	46	Male	Other Hispanic	Married	High School Grad/GED or Equivalent		no	68.8889	9	0	100	100	100	70	40	60	50	100	12824.7
2007-2008	42913	2	63	0	Yes		2007-2008	2	63	16	Female	Non-Hispanic White		9th Grade														31494.1
2007-2008	42914	2	70	2.73	No	No	2007-2008	2	70	43	Male	Other Race - Including Multi-Racial	Married	Less Than 9th Grade		no	80	9	0	100	75	100	70	100	100	100	75	178403
2007-2008	42915	2	73	0.03	Yes		2007-2008	2	73	3	Male	Other Hispanic																9215.18
2007-2008	42916	1	66	1.16	Yes		2007-2008	1	66	4	Female	Mexican American																12774.4
2007-2008	42917	2	68	5	Yes		2007-2008	2	68	5	Female	Non-Hispanic White
2007-2008	42918	1	66	0.46	No	No	2007-2008	1	66	60	Female	Mexican American	Married	9-11th Grade (Includes 12th grade with no diploma)		no	68.3333	9	0	100	100	100	30	60	100	50	75	5696.83
2007-2008	42919	1	66		No	No	2007-2008	1	66	20	Female	Mexican American	Living with partner	High School Grad/GED or Equivalent	yes	no	60	7	50	0	100	90	100			100	100	13102.6
2007-2008	42920	2	66	2.14	Yes	Yes	2007-2008	2	66	80	Male	Non-Hispanic White	Married	College Graduate or above		no	65	9	0	0	100	100	100	80	100	5	100	28022.9
2007-2008	42921	2	70	2.36	Yes		2007-2008	2	70	0	Male	Non-Hispanic White																20882.9
2007-2008	42922	1	71	3.53	Yes	No	2007-2008	1	71	70	Male	Other Hispanic	Divorced	High School Grad/GED or Equivalent		no	63.8889	9	50	100	75	70	70	20	60	30	100	10823.3
2007-2008	42923	2	66	2.55	Yes	No	2007-2008	2	66	37	Female	Mexican American	Married	High School Grad/GED or Equivalent	no	no												13246.6
2007-2008	42924	1	62	1.57	Yes		2007-2008	1	62	1	Female	Other Hispanic																5378.51
2007-2008	42925	2	69		Yes		2007-2008	2	69	3	Female	Other Hispanic																6435.57
2007-2008	42926	2	59	1.42	Yes	No	2007-2008	2	59	44	Female	Non-Hispanic White	Married	High School Grad/GED or Equivalent	no	no
2007-2008	42927	1	71		No	No	2007-2008	1	71	61	Female	Mexican American	Divorced	Some College or AA degree		yes	83.8889	9	80	100	75	40	100	60	100	100	100	13782.9
2007-2008	42928	2	66		Yes	Yes	2007-2008	2	66	80	Female	Mexican American	Widowed	Less Than 9th Grade		no
2007-2008	42929	2	61	1.06	Yes		2007-2008	2	61	17	Female	Other Hispanic		High School Graduate														27841.7
2007-2008	42930	1	66	0.73	Yes		2007-2008	1	66	11	Male	Mexican American		4th Grade														7747.99
2007-2008	42931	2	70	0.5	Yes		2007-2008	2	70	4	Male	Non-Hispanic White																20364.6
2007-2008	42932	2	65	5	Yes	No	2007-2008	2	65	42	Female	Non-Hispanic White	Married	College Graduate or above	no	no	91.6667	9	25	100	100	100	100	100	100	100	100	236350
2007-2008	42933	2	73	1.74	No		2007-2008	2	73	10	Female	Mexican American		5th Grade
2007-2008	42934	2	72	0.66	No		2007-2008	2	72	2	Female	Mexican American																8230.88
2007-2008	42935	2	73	5	Yes	No	2007-2008	2	73	59	Female	Non-Hispanic White	Married	College Graduate or above		no	59.4444	9	80	0	75	40	70	40	100	30	100	147351
2007-2008	42936	1	65	2.28	Yes		2007-2008	1	65	11	Female	Mexican American		4th Grade														26247.2
2007-2008	42937	1	63	1.28	No	No	2007-2008	1	63	22	Male	Mexican American	Never married	High School Grad/GED or Equivalent		no												24306.8
2007-2008	42938	1	63	0.7	Yes		2007-2008	1	63	2	Female	Non-Hispanic White																16281.8
2007-2008	42939	1	72	1.66	No	No	2007-2008	1	72	26	Male	Non-Hispanic Black	Married	High School Grad/GED or Equivalent		no	58.3333	9	0	100	100	20	30	40	60	100	75	23807.6
2007-2008	42940	1	61	0.69	Yes	No	2007-2008	1	61	71	Female	Non-Hispanic White	Separated	9-11th Grade (Includes 12th grade with no diploma)		yes	61.1111	9	100	100	0	40	70	80	60	50	50	19858.6
2007-2008	42941	1	61	1.42	Yes	Yes	2007-2008	1	61	70	Female	Non-Hispanic White	Married	High School Grad/GED or Equivalent		no	81.6667	9	80	100	100	70	70	40	100	75	100	30539.1
2007-2008	42942	1	65	1.36	No		2007-2008	1	65	5	Male	Mexican American																23822.5
2007-2008	42943	2	61	0.42	Yes		2007-2008	2	61	0	Female	Other Hispanic																11929.5
2007-2008	42944	2	70	4.83	Yes		2007-2008	2	70	11	Female	Non-Hispanic Black		5th Grade														3893.14
2007-2008	42945	1	71	1.16	Yes		2007-2008	1	71	6	Male	Non-Hispanic White		1st Grade														69007.4
2007-2008	42946	2	59	2.42	Yes	No	2007-2008	2	59	67	Male	Non-Hispanic Black	Widowed	High School Grad/GED or Equivalent		no												13900.7
2007-2008	42947	2	69	5	Yes	No	2007-2008	2	69	66	Male	Non-Hispanic White	Married	Less Than 9th Grade		no	67.7778	9	0	100	30	100	100	40	60	80	100	32323.4
2007-2008	42948	1	63	4.75	Yes	No	2007-2008	1	63	41	Male	Non-Hispanic White	Never married	Some College or AA degree		no	75.5556	9	50	80	100	100	30	100	40	80	100	61079.6
2007-2008	42949	1	67	5	Yes	No	2007-2008	1	67	60	Female	Non-Hispanic White	Married	Some College or AA degree		no	73.3333	9	50	90	100	100	70	0	100	50	100	67461.9
2007-2008	42950	2	66	5	Yes	No	2007-2008	2	66	40	Female	Non-Hispanic White	Married	Some College or AA degree	no	no												72714.4
2007-2008	42951	1	74	1.36	Yes		2007-2008	1	74	7	Female	Mexican American		1st Grade														23686.1
2007-2008	42952	2	62	3.54	Yes		2007-2008	2	62	11	Male	Non-Hispanic White		4th Grade														26282.5
2007-2008	42953	2	61	3.85	Yes	No	2007-2008	2	61	31	Female	Non-Hispanic White	Never married	College Graduate or above	no	no	80	9	100	100	100	70	100	0	100	50	100	155576
2007-2008	42954	2	62	0.94	Yes		2007-2008	2	62	10	Female	Other Hispanic		3rd Grade														3820.63
2007-2008	42955	2	59	1.21	Yes		2007-2008	2	59	0	Female	Non-Hispanic White																8102.98
2007-2008	42956	2	68	1.65	No		2007-2008	2	68	19	Female	Other Hispanic		11th Grade														6414.29
2007-2008	42957	2	64	3.13	Yes		2007-2008	2	64	8	Male	Mexican American		2nd Grade														10148.3
2007-2008	42958	2	74	1.85	No	No	2007-2008	2	74	37	Male	Non-Hispanic Black	Married	Some College or AA degree		no	60.5556	9	0	100	100	40	70	0	60	75	100	35134.8
2007-2008	42959	2	71		Yes		2007-2008	2	71	9	Male	Mexican American		3rd Grade														29994.1
2007-2008	42960	1	60	5	Yes	No	2007-2008	1	60	59	Female	Non-Hispanic White	Married	High School Grad/GED or Equivalent		no												177907
2007-2008	42961	2	60	2.59	Yes	No	2007-2008	2	60	80	Female	Non-Hispanic White	Widowed	Less Than 9th Grade		no	45.5556	9	50	0	100	40	70	60	60	5	25	53340.6
2007-2008	42962	2	69		Yes		2007-2008	2	69	18	Male	Non-Hispanic White		11th Grade														23132
2007-2008	42963	2	70	5	Yes		2007-2008	2	70	11	Female	Mexican American		5th Grade														7104.25
2007-2008	42964	2	72	1.01	No		2007-2008	2	72	10	Male	Mexican American		5th Grade
2007-2008	42965	1	65	1.3	Yes		2007-2008	1	65	5	Male	Mexican American																4823.98
2007-2008	42966	2	61	1.17	No		2007-2008	2	61	9	Female	Other Hispanic		3rd Grade														10555.5
2007-2008	42967	2	71		Yes		2007-2008	2	71	19	Female	Mexican American		More than high school														26096.1
2007-2008	42968	1	74	0.6	Yes		2007-2008	1	74	4	Female	Mexican American																29849.3
2007-2008	42969	1	69	0.5	Yes	No	2007-2008	1	69	34	Male	Non-Hispanic White	Married	College Graduate or above		no	80	9	50	80	100	100	30	60	100	100	100	14452.1
2007-2008	42970	2	72	2.36	Yes		2007-2008	2	72	3	Female	Other Hispanic																41246
2007-2008	42971	2	61	0.34	Yes		2007-2008	2	61	10	Male	Other Hispanic		4th Grade														14581.9
2007-2008	42972	2	62	0.75	Yes		2007-2008	2	62	10	Male	Non-Hispanic White		3rd Grade														66775.4
2007-2008	42973	2	59	3.54	Yes	No	2007-2008	2	59	37	Female	Non-Hispanic White	Married	High School Grad/GED or Equivalent	no	no	73.3333	9	0	100	0	100	100	100	60	100	100	46040.4
2007-2008	42974	2	59	0.57	Yes	No	2007-2008	2	59	37	Male	Non-Hispanic White	Married	9-11th Grade (Includes 12th grade with no diploma)		yes	73.8889	9	50	100	25	100	30	80	100	80	100	38813.6
2007-2008	42975	1	63	2.76	Yes	No	2007-2008	1	63	80	Male	Non-Hispanic White	Widowed	High School Grad/GED or Equivalent		no												27004.7
2007-2008	42976	1	63	1.14	Yes		2007-2008	1	63	5	Female	Non-Hispanic Black																8525.28
2007-2008	42977	2	61	1.06	No	No	2007-2008	2	61	38	Female	Other Hispanic	Married	High School Grad/GED or Equivalent	no	no	71.1111	9	0	60	100	100	70	60	100	75	75	58275.7
2007-2008	42978	1	67	1.1	Yes	Yes	2007-2008	1	67	79	Male	Non-Hispanic White	Married	Less Than 9th Grade		no	63.8889	9	50	0	100	20	70	80	100	80	75	7825.94
2007-2008	42979	1	71	0	No	No	2007-2008	1	71	44	Male	Mexican American	Married	9-11th Grade (Includes 12th grade with no diploma)		no	81.1111	9	80	100	100	70	70	60	100	50	100	14100
2007-2008	42980	1	68	1.69	Yes		2007-2008	1	68	14	Male	Non-Hispanic Black		9th Grade														23680.1
2007-2008	42981	1	71		Yes	No	2007-2008	1	71	65	Female	Mexican American	Married	9-11th Grade (Includes 12th grade with no diploma)		no	56.6667	9	50	0	75	100	70	40	100	0	75	6267.12
2007-2008	42982	1	60	5	Yes	Yes	2007-2008	1	60	58	Male	Non-Hispanic White	Married	Some College or AA degree		no	86.6667	9	50	100	100	70	100	60	100	100	100	145824
2007-2008	42983	2	65	3.22	Yes		2007-2008	2	65	14	Male	Non-Hispanic Black		7th Grade														14492.2
2007-2008	42984	1	69	0.58	No	No	2007-2008	1	69	28	Male	Mexican American	Living with partner	Less Than 9th Grade		no	70.5556	9	25	100	0	100	70	40	100	100	100	17303.2
2007-2008	42985	1	59	0.95	Yes	No	2007-2008	1	59	63	Male	Non-Hispanic White	Married	9-11th Grade (Includes 12th grade with no diploma)		no												14234.6
2007-2008	42986	2	74	1.27	Yes	No	2007-2008	2	74	32	Female	Non-Hispanic Black	Living with partner	Some College or AA degree	no	no												12122.4
2007-2008	42987	1	63	4.38	Yes	Yes	2007-2008	1	63	61	Female	Non-Hispanic White	Married	College Graduate or above		no	81.6667	9	50	100	75	100	30	100	100	80	100	69146.5
2007-2008	42988	2	59	0.88	Yes		2007-2008	2	59	9	Male	Non-Hispanic White		3rd Grade														13252.6
2007-2008	42989	2	64		No		2007-2008	2	64	12	Male	Mexican American		6th Grade														6147.34
2007-2008	42990	2	62	2.12	Yes		2007-2008	2	62	2	Male	Non-Hispanic White																24282.6
2007-2008	42991	2	71	1.93	No	No	2007-2008	2	71	30	Female	Mexican American	Separated	Less Than 9th Grade	yes	no	71.1111	8	25	100	100	100	15	100		100	100	11573.5
2007-2008	42992	2	68	3.07	Yes		2007-2008	2	68	12	Female	Non-Hispanic Black		6th Grade														6166.02
2007-2008	42993	2	61	2.36	Yes	No	2007-2008	2	61	55	Male	Other Hispanic	Married	High School Grad/GED or Equivalent		no	51.1111	9	50	0	0	100	30	0	100	80	100	8226.61
2007-2008	42994	1	64	0.55	No	No	2007-2008	1	64	24	Male	Non-Hispanic White	Never married	Some College or AA degree		no
2007-2008	42995	2	63	1.17	No		2007-2008	2	63	2	Female	Non-Hispanic White																17986.7
2007-2008	42996	2	67	0.06	Yes		2007-2008	2	67	12	Female	Other Race - Including Multi-Racial		5th Grade														57920.3
2007-2008	42997	1	60	0.59	No	No	2007-2008	1	60	32	Male	Non-Hispanic White	Separated	High School Grad/GED or Equivalent		no												20541.7
2007-2008	42998	1	74	5	Yes		2007-2008	1	74	17	Female	Non-Hispanic White		11th Grade														28157.3
2007-2008	42999	1	61	5	Yes		2007-2008	1	61	3	Male	Non-Hispanic White																62287.1
2007-2008	43000	1	62	0.99	Yes		2007-2008	1	62	0	Female	Mexican American																2624.55
2007-2008	43001	1	59	1.17	Yes	No	2007-2008	1	59	57	Female	Non-Hispanic Black	Widowed	Some College or AA degree		yes	69.4444	9	25	100	100	100	100	40	60	0	100	25101.6
2007-2008	43002	1	66	0.66	Yes		2007-2008	1	66	8	Male	Mexican American		1st Grade														6947.91
2007-2008	43003	2	62	4.01	Yes		2007-2008	2	62	3	Female	Non-Hispanic White																93571.2
2007-2008	43004	1	60	1.62	Yes	No	2007-2008	1	60	64	Female	Non-Hispanic White	Married	Less Than 9th Grade		no	77.2222	9	100	100	100	100	15	0	100	80	100	32801.7
2007-2008	43005	2	60	0.14	Yes	No	2007-2008	2	60	80	Female	Non-Hispanic White	Widowed	9-11th Grade (Includes 12th grade with no diploma)		no
2007-2008	43006	2	66	3.98	Yes		2007-2008	2	66	0	Male	Other Hispanic																10432.6
2007-2008	43007	1	73	5	Yes	No	2007-2008	1	73	47	Male	Other Race - Including Multi-Racial	Married	College Graduate or above		no												51486.1
2007-2008	43008	1	63	2.9	Yes	No	2007-2008	1	63	31	Female	Non-Hispanic White	Married	Some College or AA degree	no	no												43207.1
2007-2008	43009	1	68	0.9	No		2007-2008	1	68	16	Male	Non-Hispanic White		8th Grade														50722.4
2007-2008	43010	1	61	1.18	Yes		2007-2008	1	61	19	Male	Non-Hispanic Black		11th Grade														8405.97
2007-2008	43011	2	67	2.17	Yes		2007-2008	2	67	19	Male	Non-Hispanic Black		High School Graduate														6901.04
2007-2008	43012	1	65	1.45	No		2007-2008	1	65	13	Female	Mexican American		6th Grade		no												5514.98
2007-2008	43013	2	62	1.85	Yes		2007-2008	2	62	0	Male	Mexican American																9107.93
2007-2008	43014	2	66	0.91	No		2007-2008	2	66	10	Female	Mexican American		4th Grade														6437.51
2007-2008	43015	1	61	1.92	Yes	No	2007-2008	1	61	80	Male	Non-Hispanic White	Never married	High School Grad/GED or Equivalent		no	70	8	0	100	100	100	70	80		80	100	20475.8
2007-2008	43016	2	66	2.1	Yes	Yes	2007-2008	2	66	73	Female	Non-Hispanic White	Married	High School Grad/GED or Equivalent		no	59.4444	9	0	0	75	100	100	60	100	0	100	36978.1
2007-2008	43017	2	59	1.15	Yes	No	2007-2008	2	59	55	Female	Non-Hispanic White	Divorced	High School Grad/GED or Equivalent		no	43.8889	8	25	100	0	40		20	60	100	50	50465.8
2007-2008	43018	2	67	0.7	No	No	2007-2008	2	67	68	Female	Mexican American	Never married	Less Than 9th Grade		no	56.1111	9	25	100	100	40	15	60	60	5	100	4887.39
2007-2008	43019	2	62	1.46	Yes	No	2007-2008	2	62	60	Male	Non-Hispanic White	Divorced	Less Than 9th Grade		no	62.7778	9	0	80	100	100	30	100	0	55	100	99629
2007-2008	43020	1	70		No	No	2007-2008	1	70	80	Female	Non-Hispanic White	Widowed	9-11th Grade (Includes 12th grade with no diploma)		no	52.2222	9	100	0	75	40	30	20	100	5	100	18079.7
2007-2008	43021	2	63	4.72	Yes		2007-2008	2	63	15	Male	Non-Hispanic White		9th Grade														112919
2007-2008	43022	1	67	0.8	Yes	No	2007-2008	1	67	46	Female	Non-Hispanic Black	Divorced	9-11th Grade (Includes 12th grade with no diploma)		no	49.4444	8	25	0	75	100	70	40	60		75	11861
2007-2008	43023	1	60	4.75	Yes	No	2007-2008	1	60	61	Female	Mexican American	Married	High School Grad/GED or Equivalent		no	70	9	50	100	100	70	30	40	60	80	100	8657.39
2007-2008	43024	2	66	5	Yes	No	2007-2008	2	66	50	Female	Other Hispanic	Married	Some College or AA degree		no	53.3333	9	0	100	0	100	30	20	100	80	50	8214.58
2007-2008	43025	1	63	0.88	Yes	No	2007-2008	1	63	80	Female	Non-Hispanic White	Widowed	Some College or AA degree		no	70.5556	9	80	60	75	100	70	60	60	30	100	31617
2007-2008	43026	1	65	1.45	No	No	2007-2008	1	65	38	Female	Mexican American	Living with partner	9-11th Grade (Includes 12th grade with no diploma)	no	no												9084.76
2007-2008	43027	1	72		Yes		2007-2008	1	72	9	Female	Other Hispanic		3rd Grade
2007-2008	43028	2	67	3.13	Yes		2007-2008	2	67	11	Male	Non-Hispanic White		4th Grade														81214.1
2007-2008	43029	1	72	2.05	Yes	Yes	2007-2008	1	72	80	Male	Other Hispanic	Married	College Graduate or above		yes	52.2222	7	80	40	75	100	70			5	100	11730.9
2007-2008	43030	2	67	1.15	Yes	No	2007-2008	2	67	72	Male	Non-Hispanic White	Divorced	High School Grad/GED or Equivalent		no												16246.1
2007-2008	43031	2	70	3.43	Yes	No	2007-2008	2	70	80	Female	Mexican American	Divorced	Less Than 9th Grade		no	80	9	80	0	100	100	100	100	60	80	100	17625.1
2007-2008	43032	1	67	0.87	Yes	No	2007-2008	1	67	26	Male	Non-Hispanic White	Married	Some College or AA degree		no												64344.1
2007-2008	43033	2	64	0.3	Yes		2007-2008	2	64	4	Female	Non-Hispanic Black																6701.2
2007-2008	43034	2	66	2.45	Yes		2007-2008	2	66	3	Male	Mexican American																12612.9
2007-2008	43035	1	65	3.2	Yes		2007-2008	1	65	16	Female	Mexican American		10th Grade
2007-2008	43036	1	64	1.69	No	No	2007-2008	1	64	56	Female	Non-Hispanic Black	Divorced	Some College or AA degree		no	42.2222	8	50	0	80	70	0	0		80	100	33404.6
2007-2008	43037	1	65	0.73	Yes	No	2007-2008	1	65	28	Female	Non-Hispanic Black	Never married	High School Grad/GED or Equivalent	no	no	52.2222	9	0	0	100	100	30	40	100	100	0	23492.8
2007-2008	43038	2	62	2.74	Yes		2007-2008	2	62	0	Male	Non-Hispanic White																12370.2
2007-2008	43039	2	67	0.59	Yes		2007-2008	2	67	1	Male	Non-Hispanic Black																11116.1
2007-2008	43040	2	65	2.01	Yes		2007-2008	2	65	4	Male	Mexican American
2007-2008	43041	1	71	1.45	Yes	No	2007-2008	1	71	32	Female	Non-Hispanic White	Never married	9-11th Grade (Includes 12th grade with no diploma)	no	yes	64.4444	9	0	100	0	70	70	40	100	100	100	25954.3
2007-2008	43042	1	59	4.31	Yes		2007-2008	1	59	12	Female	Non-Hispanic White		6th Grade														35335.6
2007-2008	43043	2	70	0.63	Yes		2007-2008	2	70	5	Male	Mexican American																10225.3
2007-2008	43044	2	63	3.98	Yes	No	2007-2008	2	63	28	Female	Non-Hispanic White	Married	College Graduate or above	no	no	76.1111	9	0	60	25	100	100	100	100	100	100	167660
2007-2008	43045	1	65	5	Yes		2007-2008	1	65	1	Female	Non-Hispanic White
2007-2008	43046	1	61	1.24	Yes		2007-2008	1	61	10	Female	Non-Hispanic White		3rd Grade														15059.2
2007-2008	43047	1	59		Yes	Yes	2007-2008	1	59	71	Female	Other Race - Including Multi-Racial	Widowed	High School Grad/GED or Equivalent		yes	73.3333	9	25	100	75	70	100	80	30	80	100	43590.8
2007-2008	43048	2	64		Yes		2007-2008	2	64	16	Female	Non-Hispanic Black		12th Grade, No Diploma														9128.97
2007-2008	43049	2	64	1.1	Yes	No	2007-2008	2	64	73	Female	Non-Hispanic Black	Widowed	9-11th Grade (Includes 12th grade with no diploma)		no	56.6667	8	25	100	100	70	0	80	60		75	10991.3
2007-2008	43050	1	59	3.57	Yes	No	2007-2008	1	59	44	Female	Non-Hispanic Black	Married	High School Grad/GED or Equivalent	no	no												27729.4
2007-2008	43051	2	64		No	No	2007-2008	2	64	46	Female	Non-Hispanic Black	Never married	9-11th Grade (Includes 12th grade with no diploma)		no	59.4444	9	80	0	100	70	15	60	60	50	100	22387.4
2007-2008	43052	1	69	1.16	Yes		2007-2008	1	69	14	Male	Other Hispanic		8th Grade														27207
2007-2008	43053	1	70	1.47	No	No	2007-2008	1	70	46	Male	Mexican American	Never married	College Graduate or above		no												35709.9
2007-2008	43054	1	74		Yes		2007-2008	1	74	16	Female	Other Race - Including Multi-Racial		11th Grade
2007-2008	43055	1	59	1.9	Yes		2007-2008	1	59	15	Female	Non-Hispanic White		8th Grade														35335.6
2007-2008	43056	1	65	0.9	No	No	2007-2008	1	65	37	Female	Mexican American	Married	Less Than 9th Grade	no	no												8481.8
2007-2008	43057	2	66	0.15	Yes		2007-2008	2	66	2	Male	Non-Hispanic White																9390.99
2007-2008	43058	1	70	1.16	Yes		2007-2008	1	70	8	Female	Mexican American		2nd Grade														25899.8
2007-2008	43059	1	61	1.48	Yes		2007-2008	1	61	5	Male	Non-Hispanic White																11506.9
2007-2008	43060	2	69	5	Yes	No	2007-2008	2	69	39	Male	Non-Hispanic White	Divorced	College Graduate or above		no	82.2222	9	80	100	100	100	70	40	100	100	50	54946.1
2007-2008	43061	1	71	0.69	Yes		2007-2008	1	71	2	Male	Mexican American																14826.9
2007-2008	43062	2	65	5	Yes	No	2007-2008	2	65	44	Male	Non-Hispanic White	Married	College Graduate or above		no	86.6667	9	50	100	100	100	70	60	100	100	100	262563
2007-2008	43063	1	72	0.59	No	No	2007-2008	1	72	66	Male	Other Hispanic	Divorced	Less Than 9th Grade		no												6945.32
2007-2008	43064	1	64	0.8	No	No	2007-2008	1	64	33	Female	Non-Hispanic White	Married	Some College or AA degree	no	no												76683.8
2007-2008	43065	1	65	5	Yes	No	2007-2008	1	65	33	Female	Mexican American	Never married	Some College or AA degree	no	no	71.1111	9	0	0	100	70	70	100	100	100	100	9622.8
2007-2008	43066	2	67	0.8	Yes	No	2007-2008	2	67	80	Female	Non-Hispanic Black	Married	Some College or AA degree		no
2007-2008	43067	2	65	3.82	Yes	No	2007-2008	2	65	30	Female	Mexican American	Never married	Some College or AA degree	no	no	77.7778	9	50	60	75	70	70	100	100	100	75	15252.9
2007-2008	43068	2	74	1.27	Yes		2007-2008	2	74	4	Female	Non-Hispanic Black																8048.6
2007-2008	43069	1	68	3.49	Yes		2007-2008	1	68	10	Female	Non-Hispanic Black		3rd Grade														11086.4
2007-2008	43070	1	63	5	Yes		2007-2008	1	63	14	Male	Non-Hispanic White		8th Grade														38144.5
2007-2008	43071	2	62	2.29	No	No	2007-2008	2	62	40	Male	Other Hispanic	Living with partner	Less Than 9th Grade		no	78.8889	9	50	100	100	100	70	40	100	50	100	20200.2
2007-2008	43072	1	65	0.7	No		2007-2008	1	65	7	Male	Mexican American		1st Grade														4600.25
2007-2008	43073	2	61	1.57	Yes	No	2007-2008	2	61	75	Male	Non-Hispanic White	Married	High School Grad/GED or Equivalent		no	66.6667	9	50	0	75	100	70	80	100	25	100	10219.1
2007-2008	43074	1	67	1.99	Yes	No	2007-2008	1	67	43	Male	Non-Hispanic White	Married	Some College or AA degree		no	64.4444	9	25	100	0	100	100	20	60	75	100	62538.6
2007-2008	43075	2	64	0.88	Yes		2007-2008	2	64	10	Female	Mexican American		4th Grade
2007-2008	43076	1	67	1.45	Yes		2007-2008	1	67	18	Male	Non-Hispanic White		High School Graduate
2007-2008	43077	1	71	0.95	No	No	2007-2008	1	71	62	Female	Mexican American	Divorced	9-11th Grade (Includes 12th grade with no diploma)		no	50	8	80	0	100	70	30	20		50	100	6569.75
2007-2008	43078	2	60	5	Yes	No	2007-2008	2	60	44	Male	Non-Hispanic White	Married	High School Grad/GED or Equivalent		no	73.3333	9	25	100	30	100	70	60	100	75	100	218609
2007-2008	43079	1	63	4.9	Yes	No	2007-2008	1	63	68	Male	Non-Hispanic White	Divorced	College Graduate or above		no	91.1111	9	80	90	100	100	70	80	100	100	100	78471.6
2007-2008	43080	1	59	2.19	Yes	No	2007-2008	1	59	80	Female	Non-Hispanic White	Married	College Graduate or above		no
2007-2008	43081	1	71	3.15	Yes		2007-2008	1	71	0	Female	Non-Hispanic White																19205.4
2007-2008	43082	2	61		Yes		2007-2008	2	61	6	Female	Other Hispanic		2nd Grade														7482.16
2007-2008	43083	1	71	5	Yes		2007-2008	1	71	12	Female	Non-Hispanic White		6th Grade														239186
2007-2008	43084	2	60	1.83	Yes	Yes	2007-2008	2	60	68	Male	Non-Hispanic White	Never married	High School Grad/GED or Equivalent		no	53.8889	9	80	0	5	100	30	80	60	55	75	17307.1
2007-2008	43085	2	67	2.54	Yes	No	2007-2008	2	67	73	Male	Non-Hispanic Black	Married	9-11th Grade (Includes 12th grade with no diploma)		no												11778.5
2007-2008	43086	1	69	5	Yes	No	2007-2008	1	69	42	Female	Non-Hispanic White	Married	College Graduate or above	no	no	89.4444	9	25	90	100	90	100	100	100	100	100	71526.4
2007-2008	43087	1	73	5	Yes	No	2007-2008	1	73	39	Female	Other Race - Including Multi-Racial	Married	College Graduate or above	no	no	83.3333	9	80	100	100	0	70	100	100	100	100	40979.8
2007-2008	43088	1	64	1.94	Yes		2007-2008	1	64	10	Male	Non-Hispanic Black		2nd Grade
2007-2008	43089	2	67	3.3	Yes	No	2007-2008	2	67	29	Female	Other Race - Including Multi-Racial	Married	College Graduate or above	yes	no	75.5556	8	100	100	100	70	70	40		100	100	161226
2007-2008	43090	2	64	0.7	No		2007-2008	2	64	9	Female	Mexican American		3rd Grade														4731.79
2007-2008	43091	1	65	1.45	No	No	2007-2008	1	65	47	Female	Mexican American	Married	Some College or AA degree		no	67.7778	9	50	0	100	70	30	60	100	100	100	9376.74
2007-2008	43092	1	62	0.58	Yes	No	2007-2008	1	62	48	Female	Other Race - Including Multi-Racial	Divorced	Some College or AA degree		no	65.5556	9	80	0	100	40	30	60	100	80	100	14804.5
2007-2008	43093	2	70		Yes	No	2007-2008	2	70	57	Female	Mexican American	Married	High School Grad/GED or Equivalent		no	67.7778	9	80	0	100	100	30	40	60	100	100	16359.2
2007-2008	43094	1	62	0.8	Yes		2007-2008	1	62	3	Female	Other Race - Including Multi-Racial																23249.3
2007-2008	43095	1	71	4.37	No	No	2007-2008	1	71	33	Male	Mexican American	Living with partner	Some College or AA degree		no	60	9	50	100	0	100	70	20	100	25	75	36861.2
2007-2008	43096	2	69	5	Yes	No	2007-2008	2	69	50	Male	Non-Hispanic White	Married	Some College or AA degree		no	72.2222	9	25	100	75	100	100	0	100	50	100	62631.1
2007-2008	43097	2	69	1.16	Yes	Yes	2007-2008	2	69	80	Female	Non-Hispanic White	Widowed	High School Grad/GED or Equivalent		no	46.6667	7	0	0	100	100		60	60		100	22803.6
2007-2008	43098	2	60	4.01	Yes		2007-2008	2	60	18	Male	Non-Hispanic White		12th Grade, No Diploma														114919
2007-2008	43099	1	64	2.14	Yes	Yes	2007-2008	1	64	70	Male	Non-Hispanic White	Married	9-11th Grade (Includes 12th grade with no diploma)		no	68.8889	9	50	100	75	100	70	40	10	75	100	26472.5
2007-2008	43100	2	59	1.43	Yes	No	2007-2008	2	59	38	Male	Non-Hispanic White	Living with partner	9-11th Grade (Includes 12th grade with no diploma)		no	67.2222	9	50	0	100	90	30	60	100	100	75	15326.3
2007-2008	43101	2	70	0.75	No		2007-2008	2	70	2	Male	Other Hispanic
2007-2008	43102	1	63	4.08	Yes		2007-2008	1	63	4	Female	Non-Hispanic White																28265.7
2007-2008	43103	2	60	1.06	Yes		2007-2008	2	60	0	Female	Non-Hispanic White																8223.18
2007-2008	43104	2	72	2.5	No		2007-2008	2	72	5	Male	Mexican American																37503.4
2007-2008	43105	1	59	1.08	Yes		2007-2008	1	59	10	Female	Non-Hispanic Black		3rd Grade														10424.2
2007-2008	43106	2	59	0.07	Yes	No	2007-2008	2	59	46	Male	Non-Hispanic White	Married	Less Than 9th Grade		no	62.2222	9	0	100	100	100	30	40	60	30	100	76904.4
2007-2008	43107	1	62		Yes		2007-2008	1	62	4	Female	Other Race - Including Multi-Racial
2007-2008	43108	2	65	4.03	Yes		2007-2008	2	65	1	Male	Mexican American																7748.37
2007-2008	43109	2	66	3.71	No		2007-2008	2	66	14	Male	Non-Hispanic White		8th Grade														20772.6
2007-2008	43110	2	61	2.86	Yes		2007-2008	2	61	10	Male	Other Hispanic		3rd Grade														9409.67
2007-2008	43111	1	62	0.93	No	No	2007-2008	1	62	62	Male	Other Hispanic	Married	Less Than 9th Grade		no	51.1111	9	0	100	55	0	30	40	60	75	100	4936.43
2007-2008	43112	1	67	1.57	Yes	No	2007-2008	1	67	23	Male	Non-Hispanic White	Living with partner	9-11th Grade (Includes 12th grade with no diploma)		no	77.2222	9	50	100	0	70	100	100	100	75	100	48423.9
2007-2008	43113	1	68	0.79	Yes		2007-2008	1	68	2	Male	Non-Hispanic Black																2993.12
2007-2008	43114	2	60	0.7	Yes	No	2007-2008	2	60	24	Male	Non-Hispanic White	Never married	Some College or AA degree		no	48.8889	9	0	0	0	100	15	100	100	50	75	22753.5
2007-2008	43115	1	63	5	Yes	Yes	2007-2008	1	63	80	Female	Non-Hispanic White	Widowed	College Graduate or above		no	64.4444	9	50	0	75	100	100	40	60	55	100	29285
2007-2008	43116	2	62	1.65	Yes	No	2007-2008	2	62	35	Female	Non-Hispanic White	Never married	High School Grad/GED or Equivalent	no	no	88.8889	9	0	100	100	100	100	100	100	100	100	81236.6
2007-2008	43117	2	69	5	Yes	No	2007-2008	2	69	33	Female	Non-Hispanic White	Married	College Graduate or above	no	no
2007-2008	43118	2	65	2.02	Yes		2007-2008	2	65	4	Female	Non-Hispanic Black																24547.1
2007-2008	43119	1	61	5	Yes	No	2007-2008	1	61	39	Male	Non-Hispanic White	Married	High School Grad/GED or Equivalent		no												199694
2007-2008	43120	1	65	1.99	Yes		2007-2008	1	65	11	Female	Mexican American		4th Grade														4225.34
2007-2008	43121	2	74	1.89	Yes		2007-2008	2	74	9	Female	Mexican American		4th Grade
2007-2008	43122	2	66	2.55	Yes		2007-2008	2	66	11	Female	Mexican American		5th Grade														5442.87
2007-2008	43123	1	62	1.74	Yes	Yes	2007-2008	1	62	80	Male	Other Hispanic	Married	Less Than 9th Grade		no
2007-2008	43124	2	68	1.15	Yes	No	2007-2008	2	68	46	Female	Non-Hispanic White	Widowed	9-11th Grade (Includes 12th grade with no diploma)		no	56.6667	9	80	0	100	40	0	60	100	80	50	43617
2007-2008	43125	1	68	2.91	No		2007-2008	1	68	7	Female	Non-Hispanic Black		1st Grade														5012.2
2007-2008	43126	1	60	2.91	Yes		2007-2008	1	60	13	Male	Non-Hispanic White		7th Grade		no												26035.7
2007-2008	43127	1	63	0.97	No	No	2007-2008	1	63	53	Female	Non-Hispanic Black	Married	Some College or AA degree		no	78.3333	9	80	100	100	70	70	60	100	25	100	16904.4
2007-2008	43128	1	64	2.37	Yes	No	2007-2008	1	64	61	Male	Non-Hispanic Black	Divorced	High School Grad/GED or Equivalent		no												5618.53
2007-2008	43129	2	68	2.22	Yes		2007-2008	2	68	0	Male	Non-Hispanic White																26526.2
2007-2008	43130	1	70	2.17	Yes		2007-2008	1	70	8	Male	Other Race - Including Multi-Racial		2nd Grade														19693.6
2007-2008	43131	2	64	2.22	Yes	No	2007-2008	2	64	64	Male	Non-Hispanic White	Never married	High School Grad/GED or Equivalent		no	65	9	80	100	75	90	30	20	60	30	100	59612.6
2007-2008	43132	2	65	1.37	Yes		2007-2008	2	65	4	Male	Non-Hispanic Black																33870.1
2007-2008	43133	1	67	2.19	Yes	No	2007-2008	1	67	46	Male	Non-Hispanic White	Married	Some College or AA degree		no	50	9	25	100	0	100	70	20	60	75	0	94146.3
2007-2008	43134	2	60	3.94	No	No	2007-2008	2	60	38	Female	Non-Hispanic Black	Married	Some College or AA degree	no	no	88.8889	9	0	100	100	100	100	100	100	100	100	44577.7
2007-2008	43135	2	60	0.05	Yes		2007-2008	2	60	0	Female	Non-Hispanic White																11413.7
2007-2008	43136	2	65	1.95	Yes		2007-2008	2	65	7	Female	Other Hispanic		1st Grade														7778.07
2007-2008	43137	1	71	1.16	Yes		2007-2008	1	71	15	Male	Mexican American		9th Grade														8038.66
2007-2008	43138	1	64	0.23	No	No	2007-2008	1	64	46	Male	Non-Hispanic Black	Divorced	College Graduate or above		yes	57.7778	9	50	0	100	0	70	100	100	50	50	12886
2007-2008	43139	2	70	1.15	No	No	2007-2008	2	70	21	Female	Mexican American	Never married	High School Grad/GED or Equivalent	no	no	83.8889	9	25	100	100	100	30	100	100	100	100	43639.5
2007-2008	43140	2	61	3.57	Yes	No	2007-2008	2	61	41	Male	Non-Hispanic White	Married	High School Grad/GED or Equivalent		no	56.6667	9	0	0	100	100	0	80	100	30	100	153481
2007-2008	43141	1	67	0.91	Yes		2007-2008	1	67	2	Female	Non-Hispanic White																25483.1
2007-2008	43142	2	66	2.26	Yes	No	2007-2008	2	66	48	Male	Mexican American	Married	9-11th Grade (Includes 12th grade with no diploma)		no	79.4444	9	80	100	25	100	70	80	60	100	100	6853.23
2007-2008	43143	1	64	1.26	Yes	No	2007-2008	1	64	80	Female	Non-Hispanic Black	Widowed	9-11th Grade (Includes 12th grade with no diploma)		no	36.1111	5	25	0	100	100					100	10753.1
2007-2008	43144	2	72	1.18	No	No	2007-2008	2	72	26	Male	Non-Hispanic White	Never married	Some College or AA degree		no	62.7778	8	50	100	0		100	40	100	100	75	40649.6
2007-2008	43145	1	69	1.46	Yes		2007-2008	1	69	1	Male	Mexican American																5031.6
2007-2008	43146	1	66	1.21	No		2007-2008	1	66	4	Male	Mexican American																24734.3
2007-2008	43147	1	70	5	Yes		2007-2008	1	70	14	Male	Other Hispanic		8th Grade														25414.8
2007-2008	43148	1	61	0.58	Yes		2007-2008	1	61	16	Female	Non-Hispanic White		8th Grade														34929.2
2007-2008	43149	2	68	2.45	Yes		2007-2008	2	68	4	Male	Non-Hispanic Black																7896.25
2007-2008	43150	1	69	5	Yes		2007-2008	1	69	2	Male	Non-Hispanic White																38876.4
2007-2008	43151	1	68	5	Yes	No	2007-2008	1	68	50	Male	Non-Hispanic Black	Divorced	High School Grad/GED or Equivalent		no	54.4444	9	25	100	0	20	70	60	40	75	100	48503.2
2007-2008	43152	2	69	2.16	Yes		2007-2008	2	69	5	Male	Other Race - Including Multi-Racial
2007-2008	43153	2	65	1.57	No	No	2007-2008	2	65	64	Male	Non-Hispanic Black	Never married	Less Than 9th Grade		no	41.1111	9	0	0	0	100	30	40	100	0	100	16919.5
2007-2008	43154	2	69	0	No	No	2007-2008	2	69	52	Female	Other Hispanic	Separated	Less Than 9th Grade		no	67.7778	8	50	100	0	100	100	100	60		100	5379.93
2007-2008	43155	2	63	5	Yes	No	2007-2008	2	63	80	Male	Non-Hispanic White	Married	Some College or AA degree		no
2007-2008	43156	1	62	1.46	Yes		2007-2008	1	62	18	Male	Other Hispanic		11th Grade														4505.8
2007-2008	43157	2	61		No	No	2007-2008	2	61	20	Female	Mexican American	Married	Some College or AA degree	no	no	34.4444	7	25	0	0	70	15			100	100	16243.7
2007-2008	43158	1	59	0.91	Yes		2007-2008	1	59	1	Male	Mexican American																5406.57
2007-2008	43159	2	68	1.11	Yes		2007-2008	2	68	1	Male	Other Hispanic																11340.5
2007-2008	43160	1	62		Yes		2007-2008	1	62	2	Female	Other Hispanic																18062.1
2007-2008	43161	1	60	0.81	No		2007-2008	1	60	5	Male	Non-Hispanic White																28942.1
2007-2008	43162	1	62	0.62	No	No	2007-2008	1	62	20	Female	Mexican American	Never married	9-11th Grade (Includes 12th grade with no diploma)	no	no	86.1111	9	80	100	100	100	70	100	100	100	25	33283.3
2007-2008	43163	1	69	1.03	Yes		2007-2008	1	69	3	Female	Mexican American																11202.4
2007-2008	43164	1	64	0	Yes		2007-2008	1	64	0	Female	Non-Hispanic White																8651.95
2007-2008	43165	2	61	1.14	No	No	2007-2008	2	61	49	Female	Non-Hispanic White	Never married	High School Grad/GED or Equivalent		no	74.4444	9	0	100	0	100	70	100	100	100	100	69009.6
2007-2008	43166	2	65	5	Yes	No	2007-2008	2	65	54	Male	Non-Hispanic White	Married	College Graduate or above		no	77.2222	9	0	100	100	100	70	100	100	25	100	121291
2007-2008	43167	1	60	1.83	No	No	2007-2008	1	60	38	Female	Non-Hispanic White	Married	College Graduate or above	no	no												119645
2007-2008	43168	1	66	1.28	Yes	No	2007-2008	1	66	78	Male	Mexican American	Married	Less Than 9th Grade		yes	52.7778	9	0	0	75	100	30	80	60	30	100	9280.55
2007-2008	43169	1	69	3.65	Yes	No	2007-2008	1	69	52	Male	Non-Hispanic White	Married	Some College or AA degree		no	53.3333	9	25	0	0	40	100	40	100	100	75	70719.1
2007-2008	43170	2	71	5	Yes	No	2007-2008	2	71	50	Male	Non-Hispanic White	Married	College Graduate or above		no	64.4444	9	25	0	75	70	70	40	100	100	100	55471.9
2007-2008	43171	1	72	0.73	Yes		2007-2008	1	72	2	Male	Other Hispanic
2007-2008	43172	2	68	5	Yes	No	2007-2008	2	68	48	Male	Non-Hispanic White	Married	College Graduate or above		yes	81.1111	9	50	100	100	70	70	60	100	80	100	53427.5
2007-2008	43173	2	67		No	No	2007-2008	2	67	34	Male	Non-Hispanic White	Never married			no	58.3333	9	0	40	75	100	30	20	60	100	100	46735.1
2007-2008	43174	1	70	5	Yes	No	2007-2008	1	70	49	Male	Other Race - Including Multi-Racial	Married	Some College or AA degree		no	58.3333	9	25	100	0	70	30	0	100	100	100	66159.7
2007-2008	43175	1	65	1.99	No	No	2007-2008	1	65	39	Male	Mexican American	Married	Less Than 9th Grade		no	88.3333	9	25	100	100	100	70	100	100	100	100	12804.3
2007-2008	43176	2	59	4.25	Yes	No	2007-2008	2	59	36	Female	Non-Hispanic White	Married	College Graduate or above	no	no	65.5556	8	0	100	100	100	30	60	100		100	91542
2007-2008	43177	2	60	1.61	Yes	No	2007-2008	2	60	36	Male	Non-Hispanic White	Married	College Graduate or above		no	80.5556	9	80	100	75	100	70	0	100	100	100	39497.6
2007-2008	43178	1	68	2.52	Yes		2007-2008	1	68	1	Female	Non-Hispanic Black																8214.49
2007-2008	43179	1	61	2.7	Yes	No	2007-2008	1	61	80	Female	Non-Hispanic White	Widowed	High School Grad/GED or Equivalent		no
2007-2008	43180	1	68	4.96	No	No	2007-2008	1	68	64	Female	Non-Hispanic Black	Divorced	Some College or AA degree		no	73.8889	9	100	0	100	70	15	100	100	80	100	10300.9
2007-2008	43181	2	59	0.07	Yes		2007-2008	2	59	4	Male	Non-Hispanic White
2007-2008	43182	2	68	0.61	No		2007-2008	2	68	2	Male	Other Race - Including Multi-Racial																11987.3
2007-2008	43183	2	72	2.5	No		2007-2008	2	72	0	Female	Mexican American																9715.95
2007-2008	43184	2	72	5	Yes		2007-2008	2	72	0	Female	Non-Hispanic White																15509.2
2007-2008	43185	2	69	3.85	Yes	No	2007-2008	2	69	77	Male	Non-Hispanic White	Never married	College Graduate or above		no	80.5556	9	50	0	75	100	100	100	100	100	100	20462.7
2007-2008	43186	2	64	2.43	Yes	Yes	2007-2008	2	64	67	Male	Non-Hispanic White	Married	Some College or AA degree		no	65	9	25	100	75	100	30	60	40	55	100	45525.7
2007-2008	43187	2	60	5	Yes	No	2007-2008	2	60	80	Male	Non-Hispanic White	Widowed	College Graduate or above		no	82.7778	9	100	100	80	100	70	80	60	55	100	24029.4
2007-2008	43188	1	64	2.33	Yes		2007-2008	1	64	11	Female	Other Race - Including Multi-Racial		5th Grade														6217.93
2007-2008	43189	1	69	5	No	No	2007-2008	1	69	48	Male	Non-Hispanic White	Living with partner	College Graduate or above		yes	65.5556	9	50	100	75	70	70	20	100	5	100	191500
2007-2008	43190	2	70	2.12	Yes	No	2007-2008	2	70	53	Male	Mexican American	Married	Less Than 9th Grade		no	76.1111	9	50	100	50	100	70	40	100	75	100	5064.36
2007-2008	43191	1	72		No	No	2007-2008	1	72	56	Female	Other Hispanic	Divorced	Less Than 9th Grade		no	73.8889	9	25	0	100	70	70	100	100	100	100	20022.3
2007-2008	43192	1	67	4.66	Yes		2007-2008	1	67	2	Female	Non-Hispanic White																23206.3
2007-2008	43193	2	62	4.55	Yes	No	2007-2008	2	62	28	Female	Non-Hispanic White	Married	College Graduate or above	no	no	60.5556	9	50	100	100	100	0	60	30	30	75	47380.2
2007-2008	43194	2	71	0.64	Yes		2007-2008	2	71	8	Female	Mexican American		2nd Grade														5605.24
2007-2008	43195	2	71	1.66	Yes	No	2007-2008	2	71	52	Female	Non-Hispanic Black	Never married	College Graduate or above		no
2007-2008	43196	2	72	0.53	Yes		2007-2008	2	72	5	Female	Mexican American																38847.6
2007-2008	43197	2	64	0.57	Yes		2007-2008	2	64	6	Female	Non-Hispanic Black		Never Attended / Kindergarten Only														4989.64
2007-2008	43198	2	59	1.73	Yes	No	2007-2008	2	59	24	Male	Non-Hispanic White	Never married	Some College or AA degree		no	85.5556	9	0	100	100	70	100	100	100	100	100	61329.4
2007-2008	43199	2	66	0.79	Yes	No	2007-2008	2	66	22	Female	Mexican American	Separated	9-11th Grade (Includes 12th grade with no diploma)	yes	no	61.1111	8	25	0	25	100	100	100		100	100	12241
2007-2008	43200	2	67	5	No	No	2007-2008	2	67	44	Female	Non-Hispanic Black	Divorced	Some College or AA degree	no	no
2007-2008	43201	1	65	1.86	Yes		2007-2008	1	65	16	Female	Non-Hispanic White		9th Grade														29645
2007-2008	43202	2	59	1.43	No	No	2007-2008	2	59	34	Female	Non-Hispanic White	Living with partner	9-11th Grade (Includes 12th grade with no diploma)	no	no	69.4444	9	0	100	100	100	30	60	60	100	75	21925.2
2007-2008	43203	1	74	0.37	Yes		2007-2008	1	74	0	Female	Non-Hispanic White																25576.5
2007-2008	43204	1	71		Yes	No	2007-2008	1	71	80	Female	Mexican American	Widowed	9-11th Grade (Includes 12th grade with no diploma)		no												12126
2007-2008	43205	1	66	2.3	Yes	No	2007-2008	1	66	24	Female	Mexican American	Never married	Some College or AA degree	no	no	80.5556	9	50	100	100	70	30	100	100	75	100	14865.3
2007-2008	43206	2	68	3.07	Yes		2007-2008	2	68	8	Female	Non-Hispanic Black		2nd Grade														4692.17
2007-2008	43207	2	67		Yes		2007-2008	2	67	1	Female	Non-Hispanic White																10440.6
2007-2008	43208	2	67	2.15	Yes		2007-2008	2	67	3	Female	Non-Hispanic Black																10221.9
2007-2008	43209	1	63		Yes		2007-2008	1	63	4	Female	Non-Hispanic White
2007-2008	43210	2	71	3.57	Yes	Yes	2007-2008	2	71	71	Male	Other Race - Including Multi-Racial	Married	High School Grad/GED or Equivalent		yes	61.1111	8	25	0	75	70	100	80		100	100	42437.3
2007-2008	43211	2	64	0.69	Yes	No	2007-2008	2	64	80	Female	Non-Hispanic White	Never married	9-11th Grade (Includes 12th grade with no diploma)		no												46714.2
2007-2008	43212	2	74	1.27	Yes		2007-2008	2	74	17	Male	Non-Hispanic Black		11th Grade														5252.78
2007-2008	43213	1	63	2.9	Yes		2007-2008	1	63	7	Male	Non-Hispanic White		1st Grade
2007-2008	43214	1	59	4.75	Yes	No	2007-2008	1	59	54	Female	Non-Hispanic White	Married	College Graduate or above		no	61.6667	9	25	60	75	100	15	40	60	80	100	175659
2007-2008	43215	1	74	1.32	Yes	No	2007-2008	1	74	31	Female	Non-Hispanic Black	Living with partner	9-11th Grade (Includes 12th grade with no diploma)	no	no	70.5556	9	50	100	0	70	15	100	100	100	100	14598.3
2007-2008	43216	1	72	1.16	Yes	No	2007-2008	1	72	48	Male	Other Hispanic	Married	High School Grad/GED or Equivalent		no	46.1111	9	0	0	0	70	100	20	100	50	75	81218
2007-2008	43217	1	63	3.78	Yes		2007-2008	1	63	3	Female	Non-Hispanic White																35082.9
2007-2008	43218	2	64	4.83	Yes		2007-2008	2	64	3	Male	Non-Hispanic White																22504.6
2007-2008	43219	1	62	2.54	Yes		2007-2008	1	62	14	Female	Non-Hispanic White		7th Grade														15034.3
2007-2008	43220	2	71	0.77	Yes		2007-2008	2	71	2	Male	Mexican American																5954.58
2007-2008	43221	2	59	0.51	No	No	2007-2008	2	59	34	Male	Non-Hispanic White	Married	9-11th Grade (Includes 12th grade with no diploma)		no												22780
2007-2008	43222	2	65	1.94	Yes		2007-2008	2	65	15	Female	Non-Hispanic Black		9th Grade
2007-2008	43223	1	71	5	Yes		2007-2008	1	71	15	Male	Mexican American		9th Grade														8038.66
2007-2008	43224	2	61	3.57	Yes	No	2007-2008	2	61	42	Female	Non-Hispanic White	Married	College Graduate or above	no	no	55.5556	9	0	0	100	40	30	80	100	100	50	138268
2007-2008	43225	2	62	5	Yes		2007-2008	2	62	11	Male	Non-Hispanic White		5th Grade														21225.2
2007-2008	43226	2	59	0.71	Yes		2007-2008	2	59	10	Male	Non-Hispanic White		4th Grade														14622.2
2007-2008	43227	1	68	5	Yes	No	2007-2008	1	68	39	Male	Non-Hispanic Black	Married	Some College or AA degree		no	65.5556	9	50	100	100	100	15	80	40	5	100	14367.3
2007-2008	43228	2	62	1.13	No		2007-2008	2	62	19	Male	Other Hispanic		10th Grade														25177.2
2007-2008	43229	1	67	1.45	Yes	No	2007-2008	1	67	53	Male	Other Race - Including Multi-Racial	Married	College Graduate or above		no	55	9	0	100	0	70	70	40	60	55	100	12593.3
2007-2008	43230	2	61	1.7	Yes	Yes	2007-2008	2	61	29	Female	Non-Hispanic White	Divorced	High School Grad/GED or Equivalent	no	no	80	9	80	100	0	100	100	40	100	100	100	65592.6
2007-2008	43231	2	61	5	Yes		2007-2008	2	61	8	Female	Non-Hispanic White		3rd Grade														130315
2007-2008	43232	2	68	5	Yes	No	2007-2008	2	68	46	Male	Non-Hispanic White	Married	College Graduate or above		no												60830.8
2007-2008	43233	2	65	4.29	Yes	No	2007-2008	2	65	40	Male	Mexican American	Separated	Some College or AA degree		no	54.4444	9	0	100	0	20	70	40	60	100	100	17133.6
2007-2008	43234	2	67	0.49	No	No	2007-2008	2	67	44	Male	Non-Hispanic Black	Divorced	High School Grad/GED or Equivalent		no	21.6667	7	0	100	0	40	30			0	25	13818.8
2007-2008	43235	2	72	3.57	Yes	No	2007-2008	2	72	66	Male	Mexican American	Married	Some College or AA degree		no	56.6667	8	50	0	100	90	30	60		80	100	14338.7
2007-2008	43236	1	67	0.48	Yes		2007-2008	1	67	8	Male	Non-Hispanic White		1st Grade														12715.5
2007-2008	43237	2	63	2.45	Yes	No	2007-2008	2	63	68	Male	Non-Hispanic White	Living with partner	High School Grad/GED or Equivalent		no	73.8889	9	50	100	75	100	100	40	100	25	75	44804.9
2007-2008	43238	1	67	0.99	No	No	2007-2008	1	67	48	Male	Non-Hispanic White	Divorced	9-11th Grade (Includes 12th grade with no diploma)		no	63.3333	9	25	100	0	100	70	0	100	75	100	17063.4
2007-2008	43239	1	64	0.58	Yes		2007-2008	1	64	8	Female	Non-Hispanic Black		1st Grade														22811.3
2007-2008	43240	1	62	3.29	Yes	No	2007-2008	1	62	72	Female	Other Hispanic	Divorced	9-11th Grade (Includes 12th grade with no diploma)		no	45	8	50	100	30	40	30	20	60		75	4634.03
2007-2008	43241	2	70		Yes	No	2007-2008	2	70	47	Female	Mexican American	Married	Some College or AA degree		no	80.5556	9	25	40	100	100	100	60	100	100	100	7914.38
2007-2008	43242	1	68	1.57	Yes	No	2007-2008	1	68	53	Male	Non-Hispanic White	Never married	9-11th Grade (Includes 12th grade with no diploma)		yes	62.2222	9	0	100	100	40	100	60	60	50	50	22742.5
2007-2008	43243	1	67	4.75	Yes	No	2007-2008	1	67	57	Male	Non-Hispanic White	Married	College Graduate or above		no	76.1111	9	0	100	100	100	30	80	100	75	100	145441
2007-2008	43244	2	67		Yes	No	2007-2008	2	67	77	Female	Non-Hispanic Black	Divorced	Less Than 9th Grade		no	49.4444	7	50	40	100	70	30			55	100	11145.6
2007-2008	43245	2	59	1.07	Yes	No	2007-2008	2	59	62	Male	Non-Hispanic White	Married	9-11th Grade (Includes 12th grade with no diploma)		no	38.8889	9	80	0	0	100	15	40	60	5	50	18870
2007-2008	43246	1	64		Yes	No	2007-2008	1	64	21	Female	Non-Hispanic Black	Living with partner	Some College or AA degree	yes	no	53.3333	8	25	0	25	100	70	60		100	100	14043.7
2007-2008	43247	1	71	0.98	Yes	No	2007-2008	1	71	52	Male	Mexican American	Living with partner	High School Grad/GED or Equivalent		no	88.8889	9	50	100	100	100	100	100	100	50	100	9217.23
2007-2008	43248	2	71		No	No	2007-2008	2	71	24	Female	Non-Hispanic Black	Never married	Some College or AA degree	no	no
2007-2008	43249	1	65		Yes		2007-2008	1	65	12	Female	Other Race - Including Multi-Racial		6th Grade														29645
2007-2008	43250	1	64		No	No	2007-2008	1	64	20	Male	Non-Hispanic Black	Never married	High School Grad/GED or Equivalent		no	83.3333	9	25	100	100	100	100	100	100	25	100	15194.8
2007-2008	43251	1	67	1.46	Yes	No	2007-2008	1	67	67	Female	Non-Hispanic White	Married	High School Grad/GED or Equivalent		no	62.2222	9	50	40	80	90	70	40	60	30	100	31930.5
2007-2008	43252	2	73	3.87	Yes	No	2007-2008	2	73	31	Female	Mexican American	Married	College Graduate or above	yes	no	66.6667	8	50	100	100	100	30	20		100	100	44751.8
2007-2008	43253	2	62	1.27	Yes		2007-2008	2	62	14	Male	Other Hispanic		7th Grade														5797.41
2007-2008	43254	2	60	2.5	Yes	No	2007-2008	2	60	71	Male	Non-Hispanic White	Married	Some College or AA degree		no	75	9	50	100	75	100	100	0	100	50	100	26201.7
2007-2008	43255	2	68	0.23	Yes		2007-2008	2	68	3	Male	Non-Hispanic Black																9067.87
2007-2008	43256	1	62	0.87	No	No	2007-2008	1	62	36	Female	Other Hispanic	Separated	9-11th Grade (Includes 12th grade with no diploma)	no	no	85.5556	9	0	100	100	100	70	100	100	100	100	8551.04
2007-2008	43257	2	63	2.12	Yes		2007-2008	2	63	5	Male	Other Hispanic																7205.22
2007-2008	43258	2	67	0.7	No		2007-2008	2	67	12	Female	Mexican American		5th Grade														7472.98
2007-2008	43259	1	66	0.58	Yes	No	2007-2008	1	66	53	Female	Mexican American	Married	Less Than 9th Grade		no	49.4444	9	80	0	100	40	30	40	0	80	75	8704.95
2007-2008	43260	1	70	5	Yes		2007-2008	1	70	6	Female	Non-Hispanic White		Never Attended / Kindergarten Only														91054.4
2007-2008	43261	2	63	3.69	Yes	Yes	2007-2008	2	63	62	Male	Non-Hispanic Black	Married	Some College or AA degree		no	41.6667	9	50	0	55	20	30	0	40	80	100	7356.95
2007-2008	43262	2	62	0.71	Yes		2007-2008	2	62	9	Female	Non-Hispanic Black		2nd Grade														4754.22
2007-2008	43263	2	69	2.88	Yes	No	2007-2008	2	69	27	Female	Other Hispanic	Never married	College Graduate or above	no	no	90.5556	9	25	90	100	100	100	100	100	100	100	8887.4
2007-2008	43264	1	68	5	Yes	No	2007-2008	1	68	46	Female	Other Hispanic	Married	College Graduate or above		no	73.8889	9	25	100	75	100	70	20	100	75	100	10705.4
2007-2008	43265	1	63	0.97	No		2007-2008	1	63	19	Male	Non-Hispanic Black		More than high school														9328.27
2007-2008	43266	2	67	0.85	No		2007-2008	2	67	10	Female	Non-Hispanic Black		4th Grade
2007-2008	43267	2	61	0.68	No		2007-2008	2	61	2	Male	Other Hispanic																12486.8
2007-2008	43268	2	65	0	Yes	No	2007-2008	2	65	70	Female	Mexican American	Divorced	9-11th Grade (Includes 12th grade with no diploma)		no	53.8889	9	25	0	0	100	70	80	60	100	50	18385.7
2007-2008	43269	2	69	1.16	Yes	Yes	2007-2008	2	69	65	Female	Non-Hispanic White	Widowed	High School Grad/GED or Equivalent		no	51.6667	9	25	60	100	70	15	20	100	25	50	32365.5
2007-2008	43270	1	71	3.92	No	No	2007-2008	1	71	37	Male	Mexican American	Separated	High School Grad/GED or Equivalent		no
2007-2008	43271	1	61	0.69	Yes	No	2007-2008	1	61	53	Female	Non-Hispanic White	Separated	Some College or AA degree		no	63.8889	9	0	100	50	100	0	100	100	100	25	59268.8
2007-2008	43272	1	66	0.43	Yes		2007-2008	1	66	0	Female	Mexican American																3683.41
2007-2008	43273	1	68	2.42	Yes	No	2007-2008	1	68	28	Female	Non-Hispanic Black	Married	Some College or AA degree	no	no	68.8889	9	25	20	100	100	15	100	60	100	100	27092.3
2007-2008	43274	1	68	4.14	Yes		2007-2008	1	68	0	Male	Non-Hispanic White																13553.1
2007-2008	43275	1	61	1.61	Yes	No	2007-2008	1	61	68	Male	Non-Hispanic Black	Married	Some College or AA degree		no	56.6667	9	0	0	30	100	70	100	60	50	100	5203.59
2007-2008	43276	2	62	0.29	Yes		2007-2008	2	62	5	Female	Other Hispanic																29350.8
2007-2008	43277	2	64	4.83	Yes	No	2007-2008	2	64	28	Male	Non-Hispanic White	Married	Some College or AA degree		no	82.7778	9	25	100	50	70	100	100	100	100	100	51874.9
2007-2008	43278	2	67	1.7	Yes		2007-2008	2	67	19	Female	Non-Hispanic Black		High School Graduate														16276.3
2007-2008	43279	1	64	0.47	Yes		2007-2008	1	64	16	Female	Non-Hispanic Black		10th Grade														16544.4
2007-2008	43280	1	61	5	Yes	No	2007-2008	1	61	45	Female	Non-Hispanic White	Married	College Graduate or above		no	62.2222	9	0	0	0	100	100	60	100	100	100	182794
2007-2008	43281	2	60	1.65	Yes	No	2007-2008	2	60	46	Male	Non-Hispanic White	Married	Some College or AA degree		no												71002.5
2007-2008	43282	1	64	4.01	Yes	No	2007-2008	1	64	31	Female	Non-Hispanic White	Married	Some College or AA degree	no	no	55	9	0	40	0	70	100	60	100	100	25	47535.3
2007-2008	43283	2	71		Yes	No	2007-2008	2	71	53	Male	Mexican American	Married	Less Than 9th Grade		no	83.8889	9	50	100	75	100	70	60	100	100	100	13443.6
2007-2008	43284	1	66	0.15	No	No	2007-2008	1	66	55	Male	Mexican American	Separated	Less Than 9th Grade		no	72.2222	9	0	90	75	100	70	40	100	75	100	37791.1
2007-2008	43285	1	69	3.29	No	No	2007-2008	1	69	24	Male	Non-Hispanic White	Married	High School Grad/GED or Equivalent		no	71.1111	9	25	100	0	100	15	100	100	100	100	62046.9
2007-2008	43286	2	59	0.79	Yes		2007-2008	2	59	5	Male	Non-Hispanic White																9144.17
2007-2008	43287	1	64	3.03	Yes	No	2007-2008	1	64	50	Male	Non-Hispanic Black	Married	High School Grad/GED or Equivalent		no
2007-2008	43288	1	61	1.07	Yes	No	2007-2008	1	61	61	Female	Non-Hispanic White	Married	High School Grad/GED or Equivalent		no												32174.8
2007-2008	43289	1	62	0.87	No		2007-2008	1	62	6	Male	Other Hispanic		Never Attended / Kindergarten Only														4444.69
2007-2008	43290	2	61	0.73	Yes	No	2007-2008	2	61	51	Female	Other Hispanic	Separated	Less Than 9th Grade		no												40334.1
2007-2008	43291	2	65	3.22	Yes		2007-2008	2	65	5	Male	Non-Hispanic Black																10876.2
2007-2008	43292	2	63	4.72	Yes		2007-2008	2	63	7	Male	Non-Hispanic White		1st Grade														47441.8
2007-2008	43293	1	65	2.42	Yes	No	2007-2008	1	65	52	Female	Mexican American	Married	Less Than 9th Grade		no	63.8889	9	50	0	75	100	70	20	60	100	100	6294.1
2007-2008	43294	1	71		Yes	No	2007-2008	1	71	63	Female	Mexican American	Married	Some College or AA degree		no												7804.67
2007-2008	43295	2	70	5	Yes	No	2007-2008	2	70	29	Female	Other Hispanic	Married	College Graduate or above	no	no	97.7778	9	80	100	100	100	100	100	100	100	100	64437.1
2007-2008	43296	1	64	2.59	Yes	No	2007-2008	1	64	65	Female	Non-Hispanic White	Married	High School Grad/GED or Equivalent		no	73.3333	9	50	0	80	70	100	60	100	100	100	69782.4
2007-2008	43297	1	73	1.75	Yes	No	2007-2008	1	73	67	Male	Mexican American	Married	Less Than 9th Grade		no	66.1111	9	100	0	100	100	30	60	100	30	75	3963.31
2007-2008	43298	1	73		Yes	No	2007-2008	1	73	27	Male	Other Hispanic	Never married	9-11th Grade (Includes 12th grade with no diploma)		no												12223.1
2007-2008	43299	2	73	2.45	Yes	No	2007-2008	2	73	33	Male	Non-Hispanic White	Never married	College Graduate or above		no
2007-2008	43300	1	68	3.49	Yes	No	2007-2008	1	68	45	Female	Non-Hispanic Black	Married	9-11th Grade (Includes 12th grade with no diploma)		no	67.2222	8	100	60	100	100	30	40		100	75	15435.8
2007-2008	43301	1	65	1.45	No	No	2007-2008	1	65	66	Female	Mexican American	Widowed	Less Than 9th Grade		no	56.1111	9	0	0	100	100	30	80	40	55	100	3748.66
2007-2008	43302	2	60	2.83	Yes	No	2007-2008	2	60	68	Female	Non-Hispanic White	Married	High School Grad/GED or Equivalent		no												34440
2007-2008	43303	1	70		Yes	No	2007-2008	1	70	55	Female	Non-Hispanic White	Married	Some College or AA degree		no												131827
2007-2008	43304	1	72	1.27	No		2007-2008	1	72	19	Male	Non-Hispanic Black		More than high school														10281.6
2007-2008	43305	1	59		Yes	Yes	2007-2008	1	59	77	Female	Non-Hispanic White	Married	9-11th Grade (Includes 12th grade with no diploma)		no	38.3333	9	80	0	0	0	30	40	40	55	100	47745.7
2007-2008	43306	2	65	5	Yes	No	2007-2008	2	65	26	Female	Non-Hispanic White	Married	College Graduate or above	no	no	76.6667	9	80	100	0	100	70	40	100	100	100	280599
2007-2008	43307	1	65	1.45	Yes		2007-2008	1	65	3	Female	Mexican American																7403.57
2007-2008	43308	1	73	0.77	Yes		2007-2008	1	73	18	Male	Non-Hispanic White		High School Graduate														96052.1
2007-2008	43309	2	63	2.84	Yes		2007-2008	2	63	15	Female	Non-Hispanic White		9th Grade														53052.3
2007-2008	43310	1	61	1.42	Yes	No	2007-2008	1	61	78	Male	Non-Hispanic White	Married	9-11th Grade (Includes 12th grade with no diploma)		no	61.1111	9	50	100	75	70	30	60	60	5	100	25333.5
2007-2008	43311	1	70	1.07	No	No	2007-2008	1	70	47	Male	Mexican American	Married	Some College or AA degree		no	69.4444	9	25	0	100	100	100	40	60	100	100	8720.28
2007-2008	43312	2	72		Yes	No	2007-2008	2	72	77	Female	Mexican American	Divorced	High School Grad/GED or Equivalent		yes
2007-2008	43313	1	60	4.62	Yes	No	2007-2008	1	60	68	Female	Non-Hispanic White	Never married	College Graduate or above		no	63.3333	9	25	100	100	70	100	40	60	0	75	17727.5
2007-2008	43314	1	72	1.21	Yes	No	2007-2008	1	72	80	Female	Non-Hispanic Black	Widowed	Less Than 9th Grade		no												10842.7
2007-2008	43315	2	66	4.72	Yes	No	2007-2008	2	66	49	Female	Mexican American	Married	High School Grad/GED or Equivalent		no	74.4444	9	80	0	100	20	70	100	100	100	100	42589.1
2007-2008	43316	2	64		Yes	No	2007-2008	2	64	39	Male	Non-Hispanic Black	Married	Some College or AA degree		no	59.4444	9	25	0	0	100	100	60	100	100	50	13237.6
2007-2008	43317	2	64		Yes	No	2007-2008	2	64	60	Female	Non-Hispanic White	Married	High School Grad/GED or Equivalent		no	87.2222	9	80	100	25	100	100	80	100	100	100	51554.6
2007-2008	43318	1	60	5	Yes	No	2007-2008	1	60	63	Female	Non-Hispanic White	Married	Some College or AA degree		yes	58.8889	9	50	100	0	100	70	20	60	30	100	54446.2
2007-2008	43319	1	64	0.58	Yes		2007-2008	1	64	3	Male	Non-Hispanic Black																17975.2
2007-2008	43320	2	61	0.85	Yes	No	2007-2008	2	61	69	Male	Other Hispanic	Married	Less Than 9th Grade		no	64.4444	9	25	80	75	40	30	100	100	30	100	5108.33
2007-2008	43321	1	59	0.91	Yes		2007-2008	1	59	17	Male	Non-Hispanic White		10th Grade														12606.2
2007-2008	43322	1	65	1.45	No		2007-2008	1	65	17	Female	Mexican American		11th Grade														6239.48
2007-2008	43323	2	62	2.42	Yes	No	2007-2008	2	62	52	Male	Other Race - Including Multi-Racial	Married	Some College or AA degree		no												45613.9
2007-2008	43324	1	74	1.21	No	No	2007-2008	1	74	20	Male	Non-Hispanic Black	Living with partner	9-11th Grade (Includes 12th grade with no diploma)		no	76.6667	9	50	0	100	40	100	100	100	100	100	21386.8
2007-2008	43325	1	61	0.27	Yes		2007-2008	1	61	12	Male	Non-Hispanic White		5th Grade														15581.9
2007-2008	43326	2	59	0.65	Yes		2007-2008	2	59	0	Male	Non-Hispanic White																10067.9
2007-2008	43327	1	60	3.87	Yes		2007-2008	1	60	0	Female	Non-Hispanic White																44793.2
2007-2008	43328	1	72	0.87	Yes		2007-2008	1	72	5	Male	Non-Hispanic Black																23353.3
2007-2008	43329	2	69	5	Yes	No	2007-2008	2	69	37	Male	Non-Hispanic White	Married	College Graduate or above		no	68.3333	9	80	100	100	70	0	40	100	25	100	93619.7
2007-2008	43330	2	59	1.14	Yes	No	2007-2008	2	59	72	Female	Non-Hispanic White	Married	Less Than 9th Grade		no	44.4444	9	0	0	75	100	15	80	30	0	100	26149.3
2007-2008	43331	1	62	1.74	Yes		2007-2008	1	62	8	Female	Other Hispanic		3rd Grade														8458.11
2007-2008	43332	2	64	0.3	Yes		2007-2008	2	64	10	Male	Non-Hispanic Black		5th Grade														4449.71
2007-2008	43333	2	64	0.95	Yes	No	2007-2008	2	64	38	Male	Non-Hispanic Black	Separated	9-11th Grade (Includes 12th grade with no diploma)		no	56.1111	9	0	100	0	40	100	40	100	50	75	13237.6
2007-2008	43334	1	60	1.5	Yes	No	2007-2008	1	60	50	Female	Non-Hispanic White	Married	Some College or AA degree		no	37.7778	6	50	0	100	40				50	100	153980
2007-2008	43335	1	65	5	Yes	No	2007-2008	1	65	54	Female	Non-Hispanic White	Married	Some College or AA degree		no												54177.4
2007-2008	43336	2	72	2.83	Yes	No	2007-2008	2	72	23	Female	Non-Hispanic Black	Married	Some College or AA degree	no	no	73.8889	9	25	0	100	70	70	100	100	100	100	47124.6
2007-2008	43337	1	63	1.28	Yes		2007-2008	1	63	0	Female	Mexican American																2946.02
2007-2008	43338	1	73	5	Yes	No	2007-2008	1	73	26	Female	Non-Hispanic White	Living with partner	College Graduate or above	no	no	85.5556	9	25	100	100	70	100	100	100	100	75	53096.4
2007-2008	43339	1	66	4.97	Yes	No	2007-2008	1	66	34	Female	Mexican American	Married	High School Grad/GED or Equivalent	no	no	51.1111	9	0	0	100	0	100	60	100	100	0	14402.2
2007-2008	43340	1	71	1.99	Yes	No	2007-2008	1	71	34	Female	Other Hispanic	Married	High School Grad/GED or Equivalent	no	no	80.5556	9	25	0	100	100	100	100	100	100	100	11935.5
2007-2008	43341	2	69	5	No	No	2007-2008	2	69	34	Male	Non-Hispanic White	Never married	Some College or AA degree		no
2007-2008	43342	2	63	3.57	Yes	No	2007-2008	2	63	56	Male	Non-Hispanic White	Married	Some College or AA degree		no	73.8889	9	50	100	75	100	70	40	100	30	100	135011
2007-2008	43343	1	60	1.46	Yes	No	2007-2008	1	60	66	Male	Other Hispanic	Married	Less Than 9th Grade		no												5426.26
2007-2008	43344	2	69		Yes	No	2007-2008	2	69	59	Female	Other Hispanic	Married	Less Than 9th Grade		no	54.4444	9	80	0	100	100	30	0	30	50	100	11803.4
2007-2008	43345	2	59	0.81	Yes	No	2007-2008	2	59	42	Male	Non-Hispanic White	Married	Some College or AA degree		no	83.3333	9	80	100	100	40	30	100	100	100	100	57952.9
2007-2008	43346	2	68	0.46	Yes		2007-2008	2	68	9	Male	Non-Hispanic Black		3rd Grade														4642.01
2007-2008	43347	2	72	4.48	Yes	No	2007-2008	2	72	37	Female	Non-Hispanic Black	Married	College Graduate or above	no	no	70.5556	9	80	0	100	40	15	100	100	100	100	15167.7
2007-2008	43348	1	59	0.82	Yes		2007-2008	1	59	16	Female	Non-Hispanic Black		9th Grade														7183.74
2007-2008	43349	1	65	4.66	Yes	No	2007-2008	1	65	26	Female	Other Hispanic	Living with partner	Some College or AA degree	no	no	76.6667	9	80	100	100	70	0	40	100	100	100	44762.9
2007-2008	43350	1	69	0.62	Yes		2007-2008	1	69	11	Female	Mexican American		5th Grade														6289.16
2007-2008	43351	2	70	1.81	No	No	2007-2008	2	70	63	Male	Mexican American	Married	Less Than 9th Grade		no	77.7778	9	50	100	100	100	70	40	40	100	100	6899.12
2007-2008	43352	1	62	4.37	Yes	No	2007-2008	1	62	80	Female	Non-Hispanic White	Married	College Graduate or above		no												35495.6
2007-2008	43353	1	60	2.92	Yes	No	2007-2008	1	60	71	Female	Non-Hispanic White	Married	High School Grad/GED or Equivalent		no	66.1111	9	0	100	50	40	100	100	100	5	100	27231
2007-2008	43354	1	68		No		2007-2008	1	68	18	Female	Other Hispanic		11th Grade														11308
2007-2008	43355	2	69	5	Yes		2007-2008	2	69	3	Male	Other Race - Including Multi-Racial																26516.5
2007-2008	43356	2	68	4.25	Yes	No	2007-2008	2	68	34	Female	Non-Hispanic Black	Living with partner	High School Grad/GED or Equivalent	no	no	78.8889	9	0	40	100	100	70	100	100	100	100	15015.8
2007-2008	43357	2	63	2.82	Yes		2007-2008	2	63	9	Male	Non-Hispanic White		3rd Grade														31662.9
2007-2008	43358	1	61		Yes	Yes	2007-2008	1	61	71	Male	Non-Hispanic Black	Married	9-11th Grade (Includes 12th grade with no diploma)		no	78.3333	9	50	100	75	100	70	60	100	50	100	9282.4
2007-2008	43359	2	67	3.63	Yes		2007-2008	2	67	19	Female	Non-Hispanic White		More than high school														52285.2
2007-2008	43360	1	66	0.39	Yes		2007-2008	1	66	12	Male	Mexican American		5th Grade														10194.6
2007-2008	43361	2	63	4.72	Yes		2007-2008	2	63	15	Female	Non-Hispanic White		8th Grade														53052.3
2007-2008	43362	1	70	1.74	No	No	2007-2008	1	70	24	Male	Mexican American	Never married	Less Than 9th Grade		no	68.8889	9	50	100	75	70	15	60	100	75	75	11985.9
2007-2008	43363	1	63	2.18	Yes	No	2007-2008	1	63	23	Female	Non-Hispanic White	Married	9-11th Grade (Includes 12th grade with no diploma)	no	no	83.3333	9	50	100	100	70	70	60	100	100	100	51774.5
2007-2008	43364	2	68	0.19	Yes	No	2007-2008	2	68	25	Male	Non-Hispanic White	Never married	Some College or AA degree		no	80.5556	9	25	100	100	100	100	0	100	100	100	48315.7
2007-2008	43365	1	71	0.58	Yes	No	2007-2008	1	71	56	Male	Mexican American	Never married	9-11th Grade (Includes 12th grade with no diploma)		no
2007-2008	43366	1	66	1.26	Yes	No	2007-2008	1	66	61	Female	Mexican American	Married	Less Than 9th Grade		no	76.6667	9	80	90	100	40	30	100	100	50	100	8434.86
2007-2008	43367	2	64	4.83	Yes	No	2007-2008	2	64	41	Female	Non-Hispanic White	Married	College Graduate or above	no	no	59.4444	9	25	60	0	40	100	60	100	50	100	50811.3
2007-2008	43368	1	73		No		2007-2008	1	73	19	Male	Other Hispanic		11th Grade		no												5593.55
2007-2008	43369	1	59	2.9	Yes		2007-2008	1	59	6	Female	Non-Hispanic White		Never Attended / Kindergarten Only														125364
2007-2008	43370	2	61	0.92	Yes	No	2007-2008	2	61	38	Female	Other Hispanic	Never married	9-11th Grade (Includes 12th grade with no diploma)	no	no	28.3333	9	50	0	75	0	15	0	60	5	50	12493.9
2007-2008	43371	2	61	0.09	Yes		2007-2008	2	61	1	Male	Non-Hispanic Black																8776.18
2007-2008	43372	2	72		No	No	2007-2008	2	72	28	Female	Non-Hispanic White	Married	Some College or AA degree	no	no
2007-2008	43373	2	67		Yes		2007-2008	2	67	3	Male	Mexican American																20469.9
2007-2008	43374	1	62	0.96	Yes		2007-2008	1	62	0	Male	Other Race - Including Multi-Racial																13677.2
2007-2008	43375	2	68	5	Yes	No	2007-2008	2	68	47	Female	Non-Hispanic White	Married	Some College or AA degree		no	81.1111	9	50	100	75	100	30	100	100	75	100	145931
2007-2008	43376	1	65	1.45	No	No	2007-2008	1	65	33	Male	Mexican American	Married	High School Grad/GED or Equivalent		no												12804.3
2007-2008	43377	1	65	0.7	No		2007-2008	1	65	14	Male	Mexican American		6th Grade														5884.08
2007-2008	43378	1	65	0.62	No	No	2007-2008	1	65	24	Female	Mexican American	Living with partner	Less Than 9th Grade	no	no	78.8889	8	80	100	100	100	30	100	100		100	7813.6
2007-2008	43379	2	61	5	Yes	No	2007-2008	2	61	52	Male	Non-Hispanic White	Married	High School Grad/GED or Equivalent		no	67.2222	9	25	100	100	40	70	20	100	50	100	96647.5
2007-2008	43380	2	60	3.94	No		2007-2008	2	60	9	Female	Non-Hispanic Black		4th Grade														20467.6
2007-2008	43381	1	59	4.38	Yes	No	2007-2008	1	59	28	Male	Non-Hispanic White	Married	Some College or AA degree		no												52595.1
2007-2008	43382	2	61		Yes	No	2007-2008	2	61	46	Female	Non-Hispanic White	Married	College Graduate or above		no	90	9	80	100	100	100	30	100	100	100	100	174493
2007-2008	43383	2	67	5	Yes	No	2007-2008	2	67	60	Female	Non-Hispanic White	Married	College Graduate or above		no	71.1111	9	50	40	100	100	70	40	60	80	100	67378.2
2007-2008	43384	2	67	1.01	Yes	No	2007-2008	2	67	70	Male	Non-Hispanic Black	Never married	Less Than 9th Grade		no												7898.12
2007-2008	43385	1	65	0.73	No	No	2007-2008	1	65	29	Male	Mexican American	Living with partner	Less Than 9th Grade		no	55.5556	7	0	100	0	100	100			100	100	13122.4
2007-2008	43386	2	71	1.66	Yes	Yes	2007-2008	2	71	80	Male	Non-Hispanic Black	Married	College Graduate or above		yes	75.5556	9	100	60	75	100	100	80	60	5	100	7504.72
2007-2008	43387	2	61	4.26	Yes	No	2007-2008	2	61	45	Male	Non-Hispanic White	Living with partner	9-11th Grade (Includes 12th grade with no diploma)		no	58.8889	9	0	100	55	100	0	40	60	100	75	71578.5
2007-2008	43388	2	67	3.11	Yes		2007-2008	2	67	7	Female	Non-Hispanic Black		1st Grade		no												5259.04
2007-2008	43389	2	59	0.94	Yes		2007-2008	2	59	1	Female	Non-Hispanic White																16966.6
2007-2008	43390	1	65	0.96	Yes		2007-2008	1	65	10	Male	Mexican American		4th Grade														7987.11
2007-2008	43391	2	67	3.41	Yes	No	2007-2008	2	67	71	Male	Non-Hispanic White	Married	Less Than 9th Grade		no	50.5556	9	0	0	75	40	30	100	60	50	100	45382.3
2007-2008	43392	2	68	0.23	Yes		2007-2008	2	68	5	Female	Non-Hispanic Black																11405.8
2007-2008	43393	2	68	4.72	No	No	2007-2008	2	68	21	Male	Other Race - Including Multi-Racial	Never married	9-11th Grade (Includes 12th grade with no diploma)		no	48.8889	9	0	0	0	40	100	100	100	25	75	62705.9
2007-2008	43394	2	72	1.47			2007-2008	2	72	4	Female	Other Hispanic																8427.96
2007-2008	43395	1	66	1.86	Yes		2007-2008	1	66	11	Male	Mexican American		5th Grade		no												30780.3
2007-2008	43396	1	64	1.09	Yes	No	2007-2008	1	64	43	Male	Non-Hispanic White	Divorced	9-11th Grade (Includes 12th grade with no diploma)		no
2007-2008	43397	1	62	1.36	Yes		2007-2008	1	62	11	Female	Other Hispanic		5th Grade														3144.41
2007-2008	43398	1	68	4.8	Yes		2007-2008	1	68	8	Female	Non-Hispanic Black		2nd Grade														7070.52
2007-2008	43399	2	67		Yes	Yes	2007-2008	2	67	58	Female	Non-Hispanic Black	Divorced	High School Grad/GED or Equivalent		no	71.6667	9	25	100	100	70	30	20	100	100	100	39037.8
2007-2008	43400	1	71	0.33	Yes	No	2007-2008	1	71	80	Female	Mexican American	Widowed	Less Than 9th Grade		no
2007-2008	43401	1	73	5	Yes	No	2007-2008	1	73	48	Male	Non-Hispanic White	Married	College Graduate or above		yes	63.3333	7	0	100	100	100	70			100	100	153054
2007-2008	43402	1	59	0.33	Yes	No	2007-2008	1	59	23	Female	Non-Hispanic Black	Never married	9-11th Grade (Includes 12th grade with no diploma)	no	no												71596.6
2007-2008	43403	2	73	1.25	Yes		2007-2008	2	73	8	Female	Other Hispanic		2nd Grade														4279.4
2007-2008	43404	2	66	1.76	No	No	2007-2008	2	66	40	Female	Non-Hispanic White	Divorced	Some College or AA degree	no	no												32158.8
2007-2008	43405	2	71		Yes		2007-2008	2	71	17	Male	Non-Hispanic Black		11th Grade														15677.8
2007-2008	43406	1	66	0.39	No	No	2007-2008	1	66	38	Female	Mexican American	Married	9-11th Grade (Includes 12th grade with no diploma)	no	no	52.2222	9	25	0	100	70	0	40	60	100	75	14022
2007-2008	43407	1	66	2.15	Yes	No	2007-2008	1	66	55	Female	Mexican American	Divorced	9-11th Grade (Includes 12th grade with no diploma)		no	50.5556	9	0	20	75	70	100	0	60	30	100	9220.49
2007-2008	43408	1	59	1.16	No	No	2007-2008	1	59	22	Male	Non-Hispanic Black	Living with partner	Less Than 9th Grade		no	72.2222	9	0	100	0	90	100	60	100	100	100	36315.7
2007-2008	43409	2	67	5	Yes		2007-2008	2	67	14	Female	Non-Hispanic White		8th Grade														138329
2007-2008	43410	1	71	0.58	Yes		2007-2008	1	71	12	Male	Mexican American		5th Grade														30456.2
2007-2008	43411	1	62	4.66	Yes	No	2007-2008	1	62	47	Male	Non-Hispanic Black	Married	9-11th Grade (Includes 12th grade with no diploma)		no	84.4444	9	80	100	75	70	100	60	100	75	100	11936.6
2007-2008	43412	2	72	0.64	No	No	2007-2008	2	72	27	Female	Non-Hispanic Black	Never married	Some College or AA degree	no	no												17949.1
2007-2008	43413	2	59	0.58	No	No	2007-2008	2	59	61	Female	Non-Hispanic White	Divorced	Some College or AA degree		no	46.6667	9	0	100	0	70	30	60	60	25	75	22868.9
2007-2008	43414	2	61	0.81	Yes	No	2007-2008	2	61	67	Male	Non-Hispanic Black	Married	Some College or AA degree		no	75.5556	9	50	100	0	70	100	100	60	100	100	6511.07
2007-2008	43415	2	63	5	Yes	No	2007-2008	2	63	52	Male	Non-Hispanic White	Married	High School Grad/GED or Equivalent		no	55.5556	9	50	0	100	100	30	80	10	30	100	56494.8
2007-2008	43416	1	65	3.26	Yes		2007-2008	1	65	13	Male	Non-Hispanic Black		6th Grade														27600.5
2007-2008	43417	1	63	1.28	No		2007-2008	1	63	16	Female	Mexican American		9th Grade														28606.4
2007-2008	43418	1	62	1.31	Yes	Yes	2007-2008	1	62	63	Female	Non-Hispanic Black	Married	Some College or AA degree		no	63.3333	9	50	100	75	40	30	40	60	100	75	16071.2
2007-2008	43419	2	64	2.1	Yes		2007-2008	2	64	18	Female	Non-Hispanic Black		More than high school														7122.01
2007-2008	43420	1	68	2.78	Yes	No	2007-2008	1	68	46	Female	Non-Hispanic Black	Divorced	Some College or AA degree		no												26198.3
2007-2008	43421	1	72	1.09	Yes		2007-2008	1	72	0	Male	Other Hispanic																9839.39
2007-2008	43422	1	73	3.15	No		2007-2008	1	73	7	Female	Non-Hispanic White		2nd Grade
2007-2008	43423	1	71	3.94	Yes		2007-2008	1	71	12	Female	Mexican American		5th Grade														9801.42
2007-2008	43424	2	60	3.41	Yes	No	2007-2008	2	60	37	Female	Non-Hispanic White	Married	Some College or AA degree	no	no	82.7778	9	25	100	100	100	100	20	100	100	100	47535.3
2007-2008	43425	2	63	2.02	Yes	No	2007-2008	2	63	32	Female	Non-Hispanic White	Married	Some College or AA degree	no	no	72.7778	9	25	0	100	100	30	100	100	100	100	117235
2007-2008	43426	1	72		Yes	No	2007-2008	1	72	73	Female	Other Hispanic	Never married	Less Than 9th Grade		no
2007-2008	43427	1	62	0.62	Yes		2007-2008	1	62	4	Female	Other Hispanic																8227.61
2007-2008	43428	2	64	1.65	Yes		2007-2008	2	64	15	Male	Non-Hispanic Black		7th Grade														25962.6
2007-2008	43429	2	64	1.14	Yes	No	2007-2008	2	64	59	Female	Non-Hispanic Black	Married	9-11th Grade (Includes 12th grade with no diploma)		yes
2007-2008	43430	2	63	1.44	Yes	No	2007-2008	2	63	74	Male	Non-Hispanic White	Divorced	9-11th Grade (Includes 12th grade with no diploma)		yes												22585.8
2007-2008	43431	1	69	4.95	Yes		2007-2008	1	69	16	Male	Non-Hispanic White		10th Grade														136762
2007-2008	43432	2	71	2.27	Yes	No	2007-2008	2	71	64	Male	Non-Hispanic White	Married	Some College or AA degree		no	83.3333	9	50	100	75	100	70	80	100	75	100	46129.8
2007-2008	43433	1	69	3.33	Yes	No	2007-2008	1	69	55	Female	Non-Hispanic White	Divorced	Some College or AA degree		no	82.7778	9	100	100	100	40	100	100	100	30	75	74670.5
2007-2008	43434	2	61	0.21	Yes		2007-2008	2	61	8	Male	Other Hispanic		2nd Grade														25091.9
2007-2008	43435	2	71	1.93	Yes	Yes	2007-2008	2	71	34	Female	Mexican American	Living with partner	Some College or AA degree	no	no	88.3333	9	80	100	100	70	70	100	100	100	75	11573.5
2007-2008	43436	2	59	2.62	Yes		2007-2008	2	59	11	Female	Non-Hispanic White		4th Grade														43735.2
2007-2008	43437	1	67	0.91	Yes		2007-2008	1	67	10	Female	Non-Hispanic White		4th Grade														60269.9
2007-2008	43438	1	61	0.88	Yes	Yes	2007-2008	1	61	77	Female	Non-Hispanic White	Divorced	Less Than 9th Grade		yes	33.8889	9	0	0	0	40	30	80	100	5	50	16495.9
2007-2008	43439	2	67	1.25	No		2007-2008	2	67	19	Female	Non-Hispanic Black		More than high school														9984.24
2007-2008	43440	1	62	1.45	Yes	No	2007-2008	1	62	42	Male	Other Hispanic	Married	High School Grad/GED or Equivalent		yes	81.1111	9	50	100	100	100	70	60	100	50	100	36728
2007-2008	43441	2	59	1.64	Yes	Yes	2007-2008	2	59	63	Female	Non-Hispanic White	Married	9-11th Grade (Includes 12th grade with no diploma)		yes	54.4444	9	50	0	75	90	30	60	60	25	100	30530.5
2007-2008	43442	2	72	1.7	Yes		2007-2008	2	72	6	Female	Mexican American		Never Attended / Kindergarten Only														5762.95
2007-2008	43443	2	59	0.57	Yes		2007-2008	2	59	17	Male	Non-Hispanic White		9th Grade														14794.4
2007-2008	43444	1	65	0.73	Yes	No	2007-2008	1	65	54	Female	Non-Hispanic Black	Divorced	College Graduate or above		no	56.6667	9	25	60	100	40	15	40	100	80	50	17429
2007-2008	43445	1	69	1.13	No	No	2007-2008	1	69	50	Male	Mexican American	Living with partner	Less Than 9th Grade		no	59.4444	8	25	100	0	100	70	40		100	100	26245.5
2007-2008	43446	2	60	4.01	Yes		2007-2008	2	60	14	Male	Non-Hispanic White		7th Grade														36954.6
2007-2008	43447	1	70	5	Yes	No	2007-2008	1	70	76	Female	Non-Hispanic White	Widowed	College Graduate or above		no	86.6667	9	25	100	75	100	100	100	100	80	100	26996.8
2007-2008	43448	2	66	2.59	Yes		2007-2008	2	66	0	Female	Mexican American																10505.7
2007-2008	43449	2	59	2.71	Yes	No	2007-2008	2	59	39	Male	Non-Hispanic White	Married	Some College or AA degree		no	67.7778	9	50	100	75	100	15	40	100	30	100	66320.1
2007-2008	43450	2	62	5	Yes		2007-2008	2	62	8	Male	Non-Hispanic White		1st Grade														59041
2007-2008	43451	2	72	5	Yes	No	2007-2008	2	72	36	Male	Non-Hispanic White	Divorced	College Graduate or above		no												79214.9
2007-2008	43452	2	70	2.36	Yes	No	2007-2008	2	70	80	Female	Non-Hispanic Black	Widowed	9-11th Grade (Includes 12th grade with no diploma)		no	60	9	50	0	75	100	70	40	100	30	75	41134.1
2007-2008	43453	1	71	0.5	No	No	2007-2008	1	71	40	Male	Mexican American	Married	9-11th Grade (Includes 12th grade with no diploma)		no	77.7778	9	25	100	100	100	15	60	100	100	100	13959.1
2007-2008	43454	1	63	2.04	No		2007-2008	1	63	0	Female	Other Hispanic																8003.02
2007-2008	43455	2	60	5	Yes	No	2007-2008	2	60	25	Male	Other Race - Including Multi-Racial	Married	Some College or AA degree		no												46191.7
2007-2008	43456	2	63	2.12	Yes	No	2007-2008	2	63	43	Male	Non-Hispanic White	Separated	High School Grad/GED or Equivalent		no	64.4444	9	0	100	0	40	100	40	100	100	100	87680.1
2007-2008	43457	1	70	5	Yes		2007-2008	1	70	18	Female	Non-Hispanic White		11th Grade														89129.6
2007-2008	43458	2	65	4.01	No	No	2007-2008	2	65	62	Female	Mexican American	Married	Less Than 9th Grade		no	71.1111	9	50	0	100	100	70	80	60	80	100	7774.18
2007-2008	43459	2	60	3.69	Yes	No	2007-2008	2	60	28	Female	Non-Hispanic White	Married	Some College or AA degree	no	no	67.7778	9	0	100	0	100	70	40	100	100	100	203472
2007-2008	43460	1	59	0.63	Yes		2007-2008	1	59	6	Female	Non-Hispanic White		Never Attended / Kindergarten Only														21226.7
2007-2008	43461	2	62	1.02	Yes		2007-2008	2	62	5	Female	Non-Hispanic White
2007-2008	43462	1	74	0.53	Yes		2007-2008	1	74	12	Female	Non-Hispanic Black		6th Grade														6569.86
2007-2008	43463	1	61	3.43	Yes	No	2007-2008	1	61	20	Male	Non-Hispanic White	Living with partner	High School Grad/GED or Equivalent		no	91.1111	9	50	100	100	70	100	100	100	100	100	238586
2007-2008	43464	2	71	5	Yes	Yes	2007-2008	2	71	76	Male	Non-Hispanic White	Widowed	Some College or AA degree		no	82.7778	9	100	100	100	40	70	80	100	55	100	43682
2007-2008	43465	2	64	2.83	Yes	No	2007-2008	2	64	49	Female	Non-Hispanic Black	Married	9-11th Grade (Includes 12th grade with no diploma)		no	64.4444	8	50	0	100	70	100	60	100		100	20316.6
2007-2008	43466	2	60	5	Yes	No	2007-2008	2	60	47	Female	Non-Hispanic White	Married	College Graduate or above		no	87.7778	9	50	100	100	70	70	100	100	100	100	80629.4
2007-2008	43467	1	66	5	Yes		2007-2008	1	66	18	Female	Mexican American		11th Grade														17184.7
2007-2008	43468	2	60	5	Yes	Yes	2007-2008	2	60	47	Male	Non-Hispanic White	Married	9-11th Grade (Includes 12th grade with no diploma)		no
2007-2008	43469	1	60	1.46	Yes	No	2007-2008	1	60	78	Male	Non-Hispanic White	Married	High School Grad/GED or Equivalent		no	61.1111	9	25	0	100	40	70	60	100	55	100	10334
2007-2008	43470	1	59	1.04	Yes		2007-2008	1	59	19	Female	Non-Hispanic Black		11th Grade
2007-2008	43471	2	71	0.78	No		2007-2008	2	71	5	Female	Other Hispanic
2007-2008	43472	1	61	0.58	Yes		2007-2008	1	61	9	Male	Non-Hispanic White		3rd Grade														19599.5
[truncated: 73,404 more rows]

## Sheet: Supplementary File 2 
LC9 Scoring Details
Domain	CVH metric	Method of measurement	Quantification and scoring of CVH metric: adults (≥ 20 years of age)
Health behaviors	Diet	Healthy Eating Index-2015 diet score percentile	Quantiles of DASH-style diet adherence HEI-2015 (population)
			Scoring (Population):
			Points Quantile
			100 ≥ 95th percentile (top/ideal diet)
			80 75th-94th percentile
			50 50th-74th percentile
			25 25th-49th percentile
			0 1st-24th percentile (bottom/least ideal quartile)
	Physical activity	Self-reported minutes of moderate or vigorous physical activity per week	Metric: Minutes of moderate (or greater) intensity activity per week
			Scoring:
			Points Minutes
			100 ≥ 150
			90 120-149
			80 90-119
			60 60-89
			40 30-59
			20 1-29
			0 0
	Tobacco	Self-reported use of cigarettes or inhaled NDS	Metric: Combustible tobacco use and/or inhaled NDS use; or secondhand smoke exposure
			Scoring:
			Points Status
			100 Never smoker
			75 Former smoker, quit ≥5 years
			50 Former smoker, quit 1-< 5 years
			25 Former smoker, quit < 1 year, or currently using inhaled NDS
			0 Current smoker
			Subtract 20 points (unless score is 0) for living with active indoor smoker in home
	Sleep	Self-reported average hours of sleep per night	Metric: Average hours of sleep per night
			Scoring:
			Points Level
			100 7-< 9
			90 9-< 10
			70 6-< 7
			40 5-< 6 or ≥ 10
			20 4-< 5
			0 < 4
Health factors	Weight	Assessment was performed using the body mass index, which is calculated by weight (kg) /height squared (m2)	Metric: Body mass index (kg/m2)
			Scoring:
			Points Level
			100 < 25
			70 25.0-29.9
			30 30.0-34.9
			15 35.0-39.9
			0 ≥ 40.0
	Cholesterol	Plasma total and HDL-cholesterol with calculation of non-HDL-cholesterol	Metric: Non-HDL-cholesterol (mg/dL)
			Scoring:
			Points Level
			100 < 130
			60 130-159
			40 160-189
			20 190-219
			0 ≥ 220
			If drug-treated level, subtract 20 points
	Blood glucose	Fasting blood glucose or casual hemoglobin A1c	Metric: Fasting blood glucose (mg/dL) or hemoglobin A1c (%)
			Scoring:
			Points Level
			100 No history of diabetes and FBG < 100 (or HbA1c < 5.7)
			60 No diabetes and FBG 100 – 125 (or HbA1c 5.7-6.4) (Pre-diabetes)
			40 Diabetes with HbA1c < 7.0
			30 Diabetes with HbA1c 7.0-7.9
			20 Diabetes with HbA1c 8.0-8.9
			10 Diabetes with Hb A1c 9.0-9.9
			0 Diabetes with HbA1c ≥ 10.0
	Blood pressure	Appropriately measured systolic and diastolic blood pressure	Metric: Systolic and diastolic blood pressure (mm Hg)
			Scoring:
			Points Level
			100 < 120/< 80 (Optimal)
			75 120-129/< 80 (Elevated)
			50 130-139 or 80-89 (Stage 1 hypertension)
			25 140-159 or 90-99
			0 ≥ 160 or ≥ 100
			Subtract 20 points if treated level
	Psychological health	Assessment was performed using the depression score, which was calculated from the Patient Health Questionnaire-9 (PHQ-9) score.	Metric: (PHQ-9) score
			Scoring:
			Points Level
			100 0-4
			75 5-9
			50 10-14
			25 15-19
			0 20-27
